# Supplementary material
Source: Research Square preprint supplement (doi:10.21203/rs.3.rs-9337261/v1)
Supplement: Supplementary file 2 [file f72f20e21ab1d716f96cab58.xlsx]

## Sheet: CoverSheet
Journal of Industrial Ecology – www.wileyonlinelibrary.com/journal/jie
SUPPORTING INFORMATION FOR:
Citterio, C., Golinucci, N., Rinaldi, L. & Rocco, M. V. Carbon footprint of electricity: a systematic methodological and quantitative review. Journal of Industrial Ecology.
This supporting information provides the data points of carbon intensity and footprint from the considered sources, and results of computations to obtain factors for country electricity generation. "Data sources's details" extends Table 1 of the article.
Sheets summary
Intensity by technology
Statistic analysis CI by nology
Footprint by technology
Statistic analysis CF by technology
Intensity by country 2017&2023
Footprint by country 2017&2023
Statistic analyisis national CI 2017
Statistic analyisis national CI 2023
Statistic analyisis national CF 2017
Statistic analyisis national CF 2023
Data sources' details

## Sheet: Intensity by technology
Source	Technology_aggr	Technology	Country	GWP100	Unit	Notes	Data from figure 1a in manuscript
Electricity Maps	Natural Gas	NG	AT	380	g/kWh	EU-ETS, ENTSO-E 2023
Electricity Maps	Natural Gas	NG	CZ	364.25	g/kWh	EU-ETS, ENTSO-E 2023
Electricity Maps	Natural Gas	NG	US	406.034	g/kWh	eGrid 2020
Electricity Maps	Natural Gas	NG	NL	404.39	g/kWh	EU-ETS, ENTSO-E 2023
Electricity Maps	Natural Gas	NG	IE	473.89	g/kWh	EU-ETS, ENTSO-E 2023
Electricity Maps	Natural Gas	NG	BG	410.39	g/kWh	EU-ETS, ENTSO-E 2023
Electricity Maps	Natural Gas	NG	CY	410.39	g/kWh	EU-ETS, ENTSO-E 2023
Electricity Maps	Natural Gas	NG	EE	410.39	g/kWh	EU-ETS, ENTSO-E 2023
Electricity Maps	Natural Gas	NG	HR	410.39	g/kWh	EU-ETS, ENTSO-E 2023
Electricity Maps	Natural Gas	NG	LU	410.39	g/kWh	EU-ETS, ENTSO-E 2023
Electricity Maps	Natural Gas	NG	MT	410.39	g/kWh	EU-ETS, ENTSO-E 2023
Electricity Maps	Natural Gas	NG	SI	410.39	g/kWh	EU-ETS, ENTSO-E 2023
Electricity Maps	Natural Gas	NG	EL	396.14	g/kWh	EU-ETS, ENTSO-E 2023
Electricity Maps	Natural Gas	NG	BE	393.56	g/kWh	EU-ETS, ENTSO-E 2023
Electricity Maps	Natural Gas	NG	PT	375.95	g/kWh	EU-ETS, ENTSO-E 2023
Electricity Maps	Natural Gas	NG	SE	312.59	g/kWh	EU-ETS, ENTSO-E 2023
Electricity Maps	Natural Gas	NG	IT	415.98	g/kWh	EU-ETS, ENTSO-E 2023
Electricity Maps	Natural Gas	NG	DE	409.62	g/kWh	EU-ETS, ENTSO-E 2023
Electricity Maps	Natural Gas	NG	DK	299.26	g/kWh	EU-ETS, ENTSO-E 2023
Electricity Maps	Natural Gas	NG	SK	514.8	g/kWh	EU-ETS, ENTSO-E 2023
Electricity Maps	Natural Gas	NG	FR	391.79	g/kWh	EU-ETS, ENTSO-E 2023
Electricity Maps	Natural Gas	NG	ES	399.79	g/kWh	EU-ETS, ENTSO-E 2023
Electricity Maps	Natural Gas	NG	LV	371.24	g/kWh	EU-ETS, ENTSO-E 2023
Electricity Maps	Natural Gas	NG	HU	441.99	g/kWh	EU-ETS, ENTSO-E 2023
Electricity Maps	Natural Gas	NG	RO	567.48	g/kWh	EU-ETS, ENTSO-E 2023
Electricity Maps	Natural Gas	NG	LT	375.63	g/kWh	EU-ETS, ENTSO-E 2023
Electricity Maps	Natural Gas	NG	PL	408.97	g/kWh	EU-ETS, ENTSO-E 2023
Electricity Maps	Natural Gas	NG	FI	476.61	g/kWh	EU-ETS, ENTSO-E 2023
Electricity Maps	Oil	OI	FR	657.06	g/kWh	EU-ETS, ENTSO-E 2023
Electricity Maps	Oil	OI	AT	641.08	g/kWh	EU-ETS, ENTSO-E 2023
Electricity Maps	Oil	OI	BE	641.08	g/kWh	EU-ETS, ENTSO-E 2023
Electricity Maps	Oil	OI	CY	641.08	g/kWh	EU-ETS, ENTSO-E 2023
Electricity Maps	Oil	OI	DE	641.08	g/kWh	EU-ETS, ENTSO-E 2023
Electricity Maps	Oil	OI	DK	641.08	g/kWh	EU-ETS, ENTSO-E 2023
Electricity Maps	Oil	OI	EE	641.08	g/kWh	EU-ETS, ENTSO-E 2023
Electricity Maps	Oil	OI	ES	641.08	g/kWh	EU-ETS, ENTSO-E 2023
Electricity Maps	Oil	OI	FI	641.08	g/kWh	EU-ETS, ENTSO-E 2023
Electricity Maps	Oil	OI	HR	641.08	g/kWh	EU-ETS, ENTSO-E 2023
Electricity Maps	Oil	OI	HU	641.08	g/kWh	EU-ETS, ENTSO-E 2023
Electricity Maps	Oil	OI	IE	641.08	g/kWh	EU-ETS, ENTSO-E 2023
Electricity Maps	Oil	OI	LV	641.08	g/kWh	EU-ETS, ENTSO-E 2023
Electricity Maps	Oil	OI	MT	641.08	g/kWh	EU-ETS, ENTSO-E 2023
Electricity Maps	Oil	OI	PL	641.08	g/kWh	EU-ETS, ENTSO-E 2023
Electricity Maps	Oil	OI	RO	641.08	g/kWh	EU-ETS, ENTSO-E 2023
Electricity Maps	Oil	OI	SI	641.08	g/kWh	EU-ETS, ENTSO-E 2023
Electricity Maps	Oil	OI	SK	641.08	g/kWh	EU-ETS, ENTSO-E 2023
Electricity Maps	Oil	OI	US	803.899	g/kWh	eGrid 2020
Electricity Maps	Oil	OI	BG	925.95	g/kWh	EU-ETS, ENTSO-E 2022
Electricity Maps	Oil	OI	CZ	925.95	g/kWh	EU-ETS, ENTSO-E 2022
Electricity Maps	Oil	OI	EL	925.95	g/kWh	EU-ETS, ENTSO-E 2022
Electricity Maps	Oil	OI	LT	925.95	g/kWh	EU-ETS, ENTSO-E 2022
Electricity Maps	Oil	OI	LU	925.95	g/kWh	EU-ETS, ENTSO-E 2022
Electricity Maps	Oil	OI	NL	925.95	g/kWh	EU-ETS, ENTSO-E 2022
Electricity Maps	Oil	OI	PT	925.95	g/kWh	EU-ETS, ENTSO-E 2022
Electricity Maps	Oil	OI	SE	373.49	g/kWh	EU-ETS, ENTSO-E 2023
Electricity Maps	Oil	OI	IT	860.73	g/kWh	EU-ETS, ENTSO-E 2023
Electricity Maps	Coal	CO	AT	1075.5	g/kWh	EU-ETS, ENTSO-E 2022
Electricity Maps	Coal	CO	LU	1075.5	g/kWh	EU-ETS, ENTSO-E 2022
Electricity Maps	Coal	CO	PT	1075.5	g/kWh	EU-ETS, ENTSO-E 2022
Electricity Maps	Coal	CO	SE	1075.5	g/kWh	EU-ETS, ENTSO-E 2022
Electricity Maps	Coal	CO	BE	1037.31	g/kWh	EU-ETS, ENTSO-E 2023
Electricity Maps	Coal	CO	CY	1037.31	g/kWh	EU-ETS, ENTSO-E 2023
Electricity Maps	Coal	CO	EE	1037.31	g/kWh	EU-ETS, ENTSO-E 2023
Electricity Maps	Coal	CO	HR	1037.31	g/kWh	EU-ETS, ENTSO-E 2023
Electricity Maps	Coal	CO	LT	1037.31	g/kWh	EU-ETS, ENTSO-E 2023
Electricity Maps	Coal	CO	LV	1037.31	g/kWh	EU-ETS, ENTSO-E 2023
Electricity Maps	Coal	CO	MT	1037.31	g/kWh	EU-ETS, ENTSO-E 2023
Electricity Maps	Coal	CO	SI	1037.31	g/kWh	EU-ETS, ENTSO-E 2023
Electricity Maps	Coal	CO	IT	1001.28	g/kWh	EU-ETS, ENTSO-E 2023
Electricity Maps	Coal	CO	CZ	1051.99	g/kWh	EU-ETS, ENTSO-E 2023
Electricity Maps	Coal	CO	NL	799.37	g/kWh	EU-ETS, ENTSO-E 2023
Electricity Maps	Coal	CO	SK	764.9	g/kWh	EU-ETS, ENTSO-E 2023
Electricity Maps	Coal	CO	ES	1221.36	g/kWh	EU-ETS, ENTSO-E 2023
Electricity Maps	Coal	CO	BG	1123.53	g/kWh	EU-ETS, ENTSO-E 2023
Electricity Maps	Coal	CO	EL	1218.46	g/kWh	EU-ETS, ENTSO-E 2023
Electricity Maps	Coal	CO	US	989.615	g/kWh	eGrid 2020
Electricity Maps	Coal	CO	DK	720.51	g/kWh	EU-ETS, ENTSO-E 2023
Electricity Maps	Coal	CO	FR	923.04	g/kWh	EU-ETS, ENTSO-E 2023
Electricity Maps	Coal	CO	FI	718.07	g/kWh	EU-ETS, ENTSO-E 2023
Electricity Maps	Coal	CO	IE	1201.64	g/kWh	EU-ETS, ENTSO-E 2023
Electricity Maps	Coal	CO	HU	1231.95	g/kWh	EU-ETS, ENTSO-E 2023
Electricity Maps	Coal	CO	RO	1224.26	g/kWh	EU-ETS, ENTSO-E 2023
Electricity Maps	Coal	CO	DE	1018.94	g/kWh	EU-ETS, ENTSO-E 2023
Electricity Maps	Coal	CO	PL	1078.88	g/kWh	EU-ETS, ENTSO-E 2023
Electricity Maps	Wind	WI	AT	0	g/kWh	IPCC 2014
Electricity Maps	Wind	WI	BE	0	g/kWh	IPCC 2014
Electricity Maps	Wind	WI	BG	0	g/kWh	IPCC 2014
Electricity Maps	Wind	WI	CY	0	g/kWh	IPCC 2014
Electricity Maps	Wind	WI	CZ	0	g/kWh	IPCC 2014
Electricity Maps	Wind	WI	DE	0	g/kWh	IPCC 2014
Electricity Maps	Wind	WI	DK	0	g/kWh	IPCC 2014
Electricity Maps	Wind	WI	EE	0	g/kWh	IPCC 2014
Electricity Maps	Wind	WI	ES	0	g/kWh	IPCC 2014
Electricity Maps	Wind	WI	FI	0	g/kWh	IPCC 2014
Electricity Maps	Wind	WI	FR	0	g/kWh	IPCC 2014
Electricity Maps	Wind	WI	EL	0	g/kWh	IPCC 2014
Electricity Maps	Wind	WI	HR	0	g/kWh	IPCC 2014
Electricity Maps	Wind	WI	HU	0	g/kWh	IPCC 2014
Electricity Maps	Wind	WI	IE	0	g/kWh	IPCC 2014
Electricity Maps	Wind	WI	IT	0	g/kWh	IPCC 2014
Electricity Maps	Wind	WI	LT	0	g/kWh	IPCC 2014
Electricity Maps	Wind	WI	LU	0	g/kWh	IPCC 2014
Electricity Maps	Wind	WI	LV	0	g/kWh	IPCC 2014
Electricity Maps	Wind	WI	MT	0	g/kWh	IPCC 2014
Electricity Maps	Wind	WI	NL	0	g/kWh	IPCC 2014
Electricity Maps	Wind	WI	PL	0	g/kWh	IPCC 2014
Electricity Maps	Wind	WI	PT	0	g/kWh	IPCC 2014
Electricity Maps	Wind	WI	RO	0	g/kWh	IPCC 2014
Electricity Maps	Wind	WI	SE	0	g/kWh	IPCC 2014
Electricity Maps	Wind	WI	SI	0	g/kWh	IPCC 2014
Electricity Maps	Wind	WI	SK	0	g/kWh	IPCC 2014
Electricity Maps	Wind	WI	US	0	g/kWh	IPCC 2014
Electricity Maps	Hydro	HY	AT	0	g/kWh	IPCC 2014
Electricity Maps	Hydro	HY	BE	0	g/kWh	IPCC 2014
Electricity Maps	Hydro	HY	BG	0	g/kWh	IPCC 2014
Electricity Maps	Hydro	HY	CY	0	g/kWh	IPCC 2014
Electricity Maps	Hydro	HY	CZ	0	g/kWh	IPCC 2014
Electricity Maps	Hydro	HY	DE	0	g/kWh	IPCC 2014
Electricity Maps	Hydro	HY	DK	0	g/kWh	IPCC 2014
Electricity Maps	Hydro	HY	EE	0	g/kWh	IPCC 2014
Electricity Maps	Hydro	HY	ES	0	g/kWh	IPCC 2014
Electricity Maps	Hydro	HY	FI	0	g/kWh	IPCC 2014
Electricity Maps	Hydro	HY	FR	0	g/kWh	IPCC 2014
Electricity Maps	Hydro	HY	EL	0	g/kWh	IPCC 2014
Electricity Maps	Hydro	HY	HR	0	g/kWh	IPCC 2014
Electricity Maps	Hydro	HY	HU	0	g/kWh	IPCC 2014
Electricity Maps	Hydro	HY	IE	0	g/kWh	IPCC 2014
Electricity Maps	Hydro	HY	IT	0	g/kWh	IPCC 2014
Electricity Maps	Hydro	HY	LT	0	g/kWh	IPCC 2014
Electricity Maps	Hydro	HY	LU	0	g/kWh	IPCC 2014
Electricity Maps	Hydro	HY	LV	0	g/kWh	IPCC 2014
Electricity Maps	Hydro	HY	MT	0	g/kWh	IPCC 2014
Electricity Maps	Hydro	HY	NL	0	g/kWh	IPCC 2014
Electricity Maps	Hydro	HY	PL	0	g/kWh	IPCC 2014
Electricity Maps	Hydro	HY	PT	0	g/kWh	IPCC 2014
Electricity Maps	Hydro	HY	RO	0	g/kWh	IPCC 2014
Electricity Maps	Hydro	HY	SE	0	g/kWh	IPCC 2014
Electricity Maps	Hydro	HY	SI	0	g/kWh	IPCC 2014
Electricity Maps	Hydro	HY	SK	0	g/kWh	IPCC 2014
Electricity Maps	Hydro	HY	US	0	g/kWh	IPCC 2014
Electricity Maps	Solar	SO	AT	0	g/kWh	IPCC 2014
Electricity Maps	Solar	SO	BE	0	g/kWh	IPCC 2014
Electricity Maps	Solar	SO	BG	0	g/kWh	IPCC 2014
Electricity Maps	Solar	SO	CY	0	g/kWh	IPCC 2014
Electricity Maps	Solar	SO	CZ	0	g/kWh	IPCC 2014
Electricity Maps	Solar	SO	DE	0	g/kWh	IPCC 2014
Electricity Maps	Solar	SO	DK	0	g/kWh	IPCC 2014
Electricity Maps	Solar	SO	EE	0	g/kWh	IPCC 2014
Electricity Maps	Solar	SO	ES	0	g/kWh	IPCC 2014
Electricity Maps	Solar	SO	FI	0	g/kWh	IPCC 2014
Electricity Maps	Solar	SO	FR	0	g/kWh	IPCC 2014
Electricity Maps	Solar	SO	EL	0	g/kWh	IPCC 2014
Electricity Maps	Solar	SO	HR	0	g/kWh	IPCC 2014
Electricity Maps	Solar	SO	HU	0	g/kWh	IPCC 2014
Electricity Maps	Solar	SO	IE	0	g/kWh	IPCC 2014
Electricity Maps	Solar	SO	IT	0	g/kWh	IPCC 2014
Electricity Maps	Solar	SO	LT	0	g/kWh	IPCC 2014
Electricity Maps	Solar	SO	LU	0	g/kWh	IPCC 2014
Electricity Maps	Solar	SO	LV	0	g/kWh	IPCC 2014
Electricity Maps	Solar	SO	MT	0	g/kWh	IPCC 2014
Electricity Maps	Solar	SO	NL	0	g/kWh	IPCC 2014
Electricity Maps	Solar	SO	PL	0	g/kWh	IPCC 2014
Electricity Maps	Solar	SO	PT	0	g/kWh	IPCC 2014
Electricity Maps	Solar	SO	RO	0	g/kWh	IPCC 2014
Electricity Maps	Solar	SO	SE	0	g/kWh	IPCC 2014
Electricity Maps	Solar	SO	SI	0	g/kWh	IPCC 2014
Electricity Maps	Solar	SO	SK	0	g/kWh	IPCC 2014
Electricity Maps	Solar	SO	US	0	g/kWh	IPCC 2014
Electricity Maps	Biomass and waste	BWB	AT	0	g/kWh	BEIS 2021
Electricity Maps	Biomass and waste	BWB	BE	0	g/kWh	BEIS 2021
Electricity Maps	Biomass and waste	BWB	BG	0	g/kWh	BEIS 2021
Electricity Maps	Biomass and waste	BWB	CY	0	g/kWh	BEIS 2021
Electricity Maps	Biomass and waste	BWB	CZ	0	g/kWh	BEIS 2021
Electricity Maps	Biomass and waste	BWB	DE	0	g/kWh	BEIS 2021
Electricity Maps	Biomass and waste	BWB	DK	0	g/kWh	BEIS 2021
Electricity Maps	Biomass and waste	BWB	EE	0	g/kWh	BEIS 2021
Electricity Maps	Biomass and waste	BWB	ES	0	g/kWh	BEIS 2021
Electricity Maps	Biomass and waste	BWB	FI	0	g/kWh	BEIS 2021
Electricity Maps	Biomass and waste	BWB	FR	0	g/kWh	BEIS 2021
Electricity Maps	Biomass and waste	BWB	EL	0	g/kWh	BEIS 2021
Electricity Maps	Biomass and waste	BWB	HR	0	g/kWh	BEIS 2021
Electricity Maps	Biomass and waste	BWB	HU	0	g/kWh	BEIS 2021
Electricity Maps	Biomass and waste	BWB	IE	0	g/kWh	BEIS 2021
Electricity Maps	Biomass and waste	BWB	IT	0	g/kWh	BEIS 2021
Electricity Maps	Biomass and waste	BWB	LT	0	g/kWh	BEIS 2021
Electricity Maps	Biomass and waste	BWB	LU	0	g/kWh	BEIS 2021
Electricity Maps	Biomass and waste	BWB	LV	0	g/kWh	BEIS 2021
Electricity Maps	Biomass and waste	BWB	MT	0	g/kWh	BEIS 2021
Electricity Maps	Biomass and waste	BWB	NL	0	g/kWh	EU-ETS 2021
Electricity Maps	Biomass and waste	BWB	PL	0	g/kWh	BEIS 2021
Electricity Maps	Biomass and waste	BWB	PT	0	g/kWh	BEIS 2021
Electricity Maps	Biomass and waste	BWB	RO	0	g/kWh	BEIS 2021
Electricity Maps	Biomass and waste	BWB	SE	0	g/kWh	BEIS 2021
Electricity Maps	Biomass and waste	BWB	SI	0	g/kWh	BEIS 2021
Electricity Maps	Biomass and waste	BWB	SK	0	g/kWh	BEIS 2021
Electricity Maps	Biomass and waste	BWB	US	0	g/kWh	eGrid 2020
Electricity Maps	Nuclear	NU	AT	0	g/kWh	IPCC 2014
Electricity Maps	Nuclear	NU	BE	0	g/kWh	IPCC 2014
Electricity Maps	Nuclear	NU	BG	0	g/kWh	IPCC 2014
Electricity Maps	Nuclear	NU	CY	0	g/kWh	IPCC 2014
Electricity Maps	Nuclear	NU	CZ	0	g/kWh	IPCC 2014
Electricity Maps	Nuclear	NU	DE	0	g/kWh	IPCC 2014
Electricity Maps	Nuclear	NU	DK	0	g/kWh	IPCC 2014
Electricity Maps	Nuclear	NU	EE	0	g/kWh	IPCC 2014
Electricity Maps	Nuclear	NU	ES	0	g/kWh	IPCC 2014
Electricity Maps	Nuclear	NU	FI	0	g/kWh	IPCC 2014
Electricity Maps	Nuclear	NU	FR	0	g/kWh	IPCC 2014
Electricity Maps	Nuclear	NU	EL	0	g/kWh	IPCC 2014
Electricity Maps	Nuclear	NU	HR	0	g/kWh	IPCC 2014
Electricity Maps	Nuclear	NU	HU	0	g/kWh	IPCC 2014
Electricity Maps	Nuclear	NU	IE	0	g/kWh	IPCC 2014
Electricity Maps	Nuclear	NU	IT	0	g/kWh	IPCC 2014
Electricity Maps	Nuclear	NU	LT	0	g/kWh	IPCC 2014
Electricity Maps	Nuclear	NU	LU	0	g/kWh	IPCC 2014
Electricity Maps	Nuclear	NU	LV	0	g/kWh	IPCC 2014
Electricity Maps	Nuclear	NU	MT	0	g/kWh	IPCC 2014
Electricity Maps	Nuclear	NU	NL	0	g/kWh	IPCC 2014
Electricity Maps	Nuclear	NU	PL	0	g/kWh	IPCC 2014
Electricity Maps	Nuclear	NU	PT	0	g/kWh	IPCC 2014
Electricity Maps	Nuclear	NU	RO	0	g/kWh	IPCC 2014
Electricity Maps	Nuclear	NU	SE	0	g/kWh	IPCC 2014
Electricity Maps	Nuclear	NU	SI	0	g/kWh	IPCC 2014
Electricity Maps	Nuclear	NU	SK	0	g/kWh	IPCC 2014
Electricity Maps	Nuclear	NU	US	0	g/kWh	IPCC 2014
Electricity Maps	Nec	NC	AT	575	g/kWh	assumes thermal (coal, gas, or oil)
Electricity Maps	Nec	NC	BE	575	g/kWh	assumes thermal (coal, gas, or oil)
Electricity Maps	Nec	NC	BG	575	g/kWh	assumes thermal (coal, gas, or oil)
Electricity Maps	Nec	NC	CY	575	g/kWh	assumes thermal (coal, gas, or oil)
Electricity Maps	Nec	NC	CZ	575	g/kWh	assumes thermal (coal, gas, or oil)
Electricity Maps	Nec	NC	DE	575	g/kWh	assumes thermal (coal, gas, or oil)
Electricity Maps	Nec	NC	DK	575	g/kWh	assumes thermal (coal, gas, or oil)
Electricity Maps	Nec	NC	EE	575	g/kWh	assumes thermal (coal, gas, or oil)
Electricity Maps	Nec	NC	ES	575	g/kWh	assumes thermal (coal, gas, or oil)
Electricity Maps	Nec	NC	FI	575	g/kWh	assumes thermal (coal, gas, or oil)
Electricity Maps	Nec	NC	FR	575	g/kWh	assumes thermal (coal, gas, or oil)
Electricity Maps	Nec	NC	EL	575	g/kWh	assumes thermal (coal, gas, or oil)
Electricity Maps	Nec	NC	HR	575	g/kWh	assumes thermal (coal, gas, or oil)
Electricity Maps	Nec	NC	HU	575	g/kWh	assumes thermal (coal, gas, or oil)
Electricity Maps	Nec	NC	IE	575	g/kWh	assumes thermal (coal, gas, or oil)
Electricity Maps	Nec	NC	IT	575	g/kWh	assumes thermal (coal, gas, or oil)
Electricity Maps	Nec	NC	LT	575	g/kWh	assumes thermal (coal, gas, or oil)
Electricity Maps	Nec	NC	LU	575	g/kWh	assumes thermal (coal, gas, or oil)
Electricity Maps	Nec	NC	LV	575	g/kWh	assumes thermal (coal, gas, or oil)
Electricity Maps	Nec	NC	MT	575	g/kWh	assumes thermal (coal, gas, or oil)
Electricity Maps	Nec	NC	NL	575	g/kWh	assumes thermal (coal, gas, or oil)
Electricity Maps	Nec	NC	PL	575	g/kWh	assumes thermal (coal, gas, or oil)
Electricity Maps	Nec	NC	PT	575	g/kWh	assumes thermal (coal, gas, or oil)
Electricity Maps	Nec	NC	RO	575	g/kWh	assumes thermal (coal, gas, or oil)
Electricity Maps	Nec	NC	SI	575	g/kWh	assumes thermal (coal, gas, or oil)
Electricity Maps	Nec	NC	SK	575	g/kWh	assumes thermal (coal, gas, or oil)
Electricity Maps	Nec	NC	US	575	g/kWh	assumes thermal (coal, gas, or oil)
Electricity Maps	Nec	NC	SE	28.6	g/kWh	Eurostat 2022; assumes 98.26% biomass, 1.09% oil, 0.64% peat, 0.01% coal
Electricity Maps	Geothermal	GE	AT	0	g/kWh	IPCC 2014
Electricity Maps	Geothermal	GE	BE	0	g/kWh	IPCC 2014
Electricity Maps	Geothermal	GE	BG	0	g/kWh	IPCC 2014
Electricity Maps	Geothermal	GE	CY	0	g/kWh	IPCC 2014
Electricity Maps	Geothermal	GE	CZ	0	g/kWh	IPCC 2014
Electricity Maps	Geothermal	GE	DE	0	g/kWh	IPCC 2014
Electricity Maps	Geothermal	GE	DK	0	g/kWh	IPCC 2014
Electricity Maps	Geothermal	GE	EE	0	g/kWh	IPCC 2014
Electricity Maps	Geothermal	GE	ES	0	g/kWh	IPCC 2014
Electricity Maps	Geothermal	GE	FI	0	g/kWh	IPCC 2014
Electricity Maps	Geothermal	GE	FR	0	g/kWh	IPCC 2014
Electricity Maps	Geothermal	GE	EL	0	g/kWh	IPCC 2014
Electricity Maps	Geothermal	GE	HR	0	g/kWh	IPCC 2014
Electricity Maps	Geothermal	GE	HU	0	g/kWh	IPCC 2014
Electricity Maps	Geothermal	GE	IE	0	g/kWh	IPCC 2014
Electricity Maps	Geothermal	GE	IT	0	g/kWh	IPCC 2014
Electricity Maps	Geothermal	GE	LT	0	g/kWh	IPCC 2014
Electricity Maps	Geothermal	GE	LU	0	g/kWh	IPCC 2014
Electricity Maps	Geothermal	GE	LV	0	g/kWh	IPCC 2014
Electricity Maps	Geothermal	GE	MT	0	g/kWh	IPCC 2014
Electricity Maps	Geothermal	GE	NL	0	g/kWh	IPCC 2014
Electricity Maps	Geothermal	GE	PL	0	g/kWh	IPCC 2014
Electricity Maps	Geothermal	GE	PT	0	g/kWh	IPCC 2014
Electricity Maps	Geothermal	GE	RO	0	g/kWh	IPCC 2014
Electricity Maps	Geothermal	GE	SE	0	g/kWh	IPCC 2014
Electricity Maps	Geothermal	GE	SI	0	g/kWh	IPCC 2014
Electricity Maps	Geothermal	GE	SK	0	g/kWh	IPCC 2014
Electricity Maps	Geothermal	GE	US	70.8799	g/kWh	eGrid 2020
EXIO Hybrid	Biomass and waste	BW	AT	9.82329	g/kWh	activity
EXIO Hybrid	Biomass and waste	BW	BE	4.89639	g/kWh	activity
EXIO Hybrid	Biomass and waste	BW	CZ	14.5525	g/kWh	activity
EXIO Hybrid	Biomass and waste	BW	DE	0.598167	g/kWh	activity
EXIO Hybrid	Biomass and waste	BW	DK	5.6334	g/kWh	activity
EXIO Hybrid	Biomass and waste	BW	EE	1.44966	g/kWh	activity
EXIO Hybrid	Biomass and waste	BW	ES	14.1008	g/kWh	activity
EXIO Hybrid	Biomass and waste	BW	FI	0.877987	g/kWh	activity
EXIO Hybrid	Biomass and waste	BW	FR	15.4031	g/kWh	activity
EXIO Hybrid	Biomass and waste	BW	HR	17.787	g/kWh	activity
EXIO Hybrid	Biomass and waste	BW	HU	11.9309	g/kWh	activity
EXIO Hybrid	Biomass and waste	BW	IE	3.43502	g/kWh	activity
EXIO Hybrid	Biomass and waste	BW	IT	9.19617	g/kWh	activity
EXIO Hybrid	Biomass and waste	BW	LT	15.6195	g/kWh	activity
EXIO Hybrid	Biomass and waste	BW	LV	9.03968	g/kWh	activity
EXIO Hybrid	Biomass and waste	BW	NL	1.94123	g/kWh	activity
EXIO Hybrid	Biomass and waste	BW	PL	7.70285	g/kWh	activity
EXIO Hybrid	Biomass and waste	BW	PT	0.731832	g/kWh	activity
EXIO Hybrid	Biomass and waste	BW	RO	7.35807	g/kWh	activity
EXIO Hybrid	Biomass and waste	BW	SE	2.66539	g/kWh	activity
EXIO Hybrid	Biomass and waste	BW	SI	0.697349	g/kWh	activity
EXIO Hybrid	Biomass and waste	BW	SK	5.83728	g/kWh	activity
EXIO Hybrid	Biomass and waste	BW	US	6.1074	g/kWh	activity
EXIO Hybrid	Coal	CO	AT	927.123	g/kWh	activity
EXIO Hybrid	Coal	CO	BE	904.787	g/kWh	activity
EXIO Hybrid	Coal	CO	BG	1105.09	g/kWh	activity
EXIO Hybrid	Coal	CO	CZ	1039.41	g/kWh	activity
EXIO Hybrid	Coal	CO	DE	908.66	g/kWh	activity
EXIO Hybrid	Coal	CO	DK	931.237	g/kWh	activity
EXIO Hybrid	Coal	CO	EE	1204.07	g/kWh	activity
EXIO Hybrid	Coal	CO	EL	1066.35	g/kWh	activity
EXIO Hybrid	Coal	CO	ES	921.311	g/kWh	activity
EXIO Hybrid	Coal	CO	FI	966.774	g/kWh	activity
EXIO Hybrid	Coal	CO	FR	791.435	g/kWh	activity
EXIO Hybrid	Coal	CO	HR	861.216	g/kWh	activity
EXIO Hybrid	Coal	CO	HU	1050.27	g/kWh	activity
EXIO Hybrid	Coal	CO	IE	824.209	g/kWh	activity
EXIO Hybrid	Coal	CO	IT	887.369	g/kWh	activity
EXIO Hybrid	Coal	CO	NL	720.772	g/kWh	activity
EXIO Hybrid	Coal	CO	PL	878.022	g/kWh	activity
EXIO Hybrid	Coal	CO	PT	892.287	g/kWh	activity
EXIO Hybrid	Coal	CO	RO	1050.5	g/kWh	activity
EXIO Hybrid	Coal	CO	SE	942.516	g/kWh	activity
EXIO Hybrid	Coal	CO	SI	981.88	g/kWh	activity
EXIO Hybrid	Coal	CO	SK	1014.87	g/kWh	activity
EXIO Hybrid	Coal	CO	US	927.342	g/kWh	activity
EXIO Hybrid	Geothermal	GE	AT	0.106453	g/kWh	activity
EXIO Hybrid	Geothermal	GE	IT	0.0851871	g/kWh	activity
EXIO Hybrid	Geothermal	GE	PT	0.238707	g/kWh	activity
EXIO Hybrid	Geothermal	GE	US	0.322826	g/kWh	activity
EXIO Hybrid	Hydro	HY	AT	0.0576258	g/kWh	activity
EXIO Hybrid	Hydro	HY	BE	0.0855517	g/kWh	activity
EXIO Hybrid	Hydro	HY	BG	0.278452	g/kWh	activity
EXIO Hybrid	Hydro	HY	CZ	0.0978405	g/kWh	activity
EXIO Hybrid	Hydro	HY	DE	0.0451807	g/kWh	activity
EXIO Hybrid	Hydro	HY	DK	0.239431	g/kWh	activity
EXIO Hybrid	Hydro	HY	EE	0.169105	g/kWh	activity
EXIO Hybrid	Hydro	HY	EL	0.141031	g/kWh	activity
EXIO Hybrid	Hydro	HY	ES	0.111441	g/kWh	activity
EXIO Hybrid	Hydro	HY	FI	0.142572	g/kWh	activity
EXIO Hybrid	Hydro	HY	FR	0.0497783	g/kWh	activity
EXIO Hybrid	Hydro	HY	HR	0.046541	g/kWh	activity
EXIO Hybrid	Hydro	HY	HU	0.503671	g/kWh	activity
EXIO Hybrid	Hydro	HY	IE	0.404871	g/kWh	activity
EXIO Hybrid	Hydro	HY	IT	0.0621075	g/kWh	activity
EXIO Hybrid	Hydro	HY	LT	0.762886	g/kWh	activity
EXIO Hybrid	Hydro	HY	LU	0.530041	g/kWh	activity
EXIO Hybrid	Hydro	HY	LV	1.01846	g/kWh	activity
EXIO Hybrid	Hydro	HY	NL	0.420041	g/kWh	activity
EXIO Hybrid	Hydro	HY	PL	0.47143	g/kWh	activity
EXIO Hybrid	Hydro	HY	PT	0.218195	g/kWh	activity
EXIO Hybrid	Hydro	HY	RO	1.00862	g/kWh	activity
EXIO Hybrid	Hydro	HY	SE	0.0189936	g/kWh	activity
EXIO Hybrid	Hydro	HY	SI	0.0808775	g/kWh	activity
EXIO Hybrid	Hydro	HY	SK	0.370419	g/kWh	activity
EXIO Hybrid	Hydro	HY	US	0.266625	g/kWh	activity
EXIO Hybrid	Nec	NC	AT	6.51368	g/kWh	activity
EXIO Hybrid	Nec	NC	BE	0.594928	g/kWh	activity
EXIO Hybrid	Nec	NC	BG	13.3366	g/kWh	activity
EXIO Hybrid	Nec	NC	FI	0.391802	g/kWh	activity
EXIO Hybrid	Nec	NC	LT	7.6573e-07	g/kWh	activity
EXIO Hybrid	Nec	NC	NL	6.28456	g/kWh	activity
EXIO Hybrid	Natural Gas	NG	AT	794.712	g/kWh	activity
EXIO Hybrid	Natural Gas	NG	BE	690.055	g/kWh	activity
EXIO Hybrid	Natural Gas	NG	BG	537.634	g/kWh	activity
EXIO Hybrid	Natural Gas	NG	CZ	642.337	g/kWh	activity
EXIO Hybrid	Natural Gas	NG	DE	757.122	g/kWh	activity
EXIO Hybrid	Natural Gas	NG	DK	540.318	g/kWh	activity
EXIO Hybrid	Natural Gas	NG	EE	676.312	g/kWh	activity
EXIO Hybrid	Natural Gas	NG	EL	537.325	g/kWh	activity
EXIO Hybrid	Natural Gas	NG	ES	559.263	g/kWh	activity
EXIO Hybrid	Natural Gas	NG	FI	1457.42	g/kWh	activity
EXIO Hybrid	Natural Gas	NG	FR	671.447	g/kWh	activity
EXIO Hybrid	Natural Gas	NG	HR	648.385	g/kWh	activity
EXIO Hybrid	Natural Gas	NG	HU	584.108	g/kWh	activity
EXIO Hybrid	Natural Gas	NG	IE	537.295	g/kWh	activity
EXIO Hybrid	Natural Gas	NG	IT	567.768	g/kWh	activity
EXIO Hybrid	Natural Gas	NG	LT	648.409	g/kWh	activity
EXIO Hybrid	Natural Gas	NG	LU	502.713	g/kWh	activity
EXIO Hybrid	Natural Gas	NG	LV	648.385	g/kWh	activity
EXIO Hybrid	Natural Gas	NG	NL	628.313	g/kWh	activity
EXIO Hybrid	Natural Gas	NG	PL	631.121	g/kWh	activity
EXIO Hybrid	Natural Gas	NG	PT	537.297	g/kWh	activity
EXIO Hybrid	Natural Gas	NG	RO	670.473	g/kWh	activity
EXIO Hybrid	Natural Gas	NG	SE	910.506	g/kWh	activity
EXIO Hybrid	Natural Gas	NG	SI	537.298	g/kWh	activity
EXIO Hybrid	Natural Gas	NG	SK	633.728	g/kWh	activity
EXIO Hybrid	Natural Gas	NG	US	468.339	g/kWh	activity
EXIO Hybrid	Nuclear	NU	BE	0.0430532	g/kWh	activity
EXIO Hybrid	Nuclear	NU	BG	0.251292	g/kWh	activity
EXIO Hybrid	Nuclear	NU	CZ	0.0755135	g/kWh	activity
EXIO Hybrid	Nuclear	NU	DE	0.0485196	g/kWh	activity
EXIO Hybrid	Nuclear	NU	ES	0.118308	g/kWh	activity
EXIO Hybrid	Nuclear	NU	FI	0.126273	g/kWh	activity
EXIO Hybrid	Nuclear	NU	FR	0.0382797	g/kWh	activity
EXIO Hybrid	Nuclear	NU	HU	0.498224	g/kWh	activity
EXIO Hybrid	Nuclear	NU	NL	0.226798	g/kWh	activity
EXIO Hybrid	Nuclear	NU	RO	0.327237	g/kWh	activity
EXIO Hybrid	Nuclear	NU	SE	0.021121	g/kWh	activity
EXIO Hybrid	Nuclear	NU	SI	0.0807475	g/kWh	activity
EXIO Hybrid	Nuclear	NU	SK	0.306709	g/kWh	activity
EXIO Hybrid	Nuclear	NU	US	0.349092	g/kWh	activity
EXIO Hybrid	Oil	OI	AT	603.73	g/kWh	activity
EXIO Hybrid	Oil	OI	BE	671.386	g/kWh	activity
EXIO Hybrid	Oil	OI	BG	893.233	g/kWh	activity
EXIO Hybrid	Oil	OI	CY	780.592	g/kWh	activity
EXIO Hybrid	Oil	OI	CZ	1112.71	g/kWh	activity
EXIO Hybrid	Oil	OI	DE	594.339	g/kWh	activity
EXIO Hybrid	Oil	OI	DK	595.685	g/kWh	activity
EXIO Hybrid	Oil	OI	EE	595.635	g/kWh	activity
EXIO Hybrid	Oil	OI	EL	980.73	g/kWh	activity
EXIO Hybrid	Oil	OI	ES	735.425	g/kWh	activity
EXIO Hybrid	Oil	OI	FI	756.242	g/kWh	activity
EXIO Hybrid	Oil	OI	FR	817.556	g/kWh	activity
EXIO Hybrid	Oil	OI	HR	635.489	g/kWh	activity
EXIO Hybrid	Oil	OI	HU	1113.33	g/kWh	activity
EXIO Hybrid	Oil	OI	IE	758.855	g/kWh	activity
EXIO Hybrid	Oil	OI	IT	746.235	g/kWh	activity
EXIO Hybrid	Oil	OI	LT	759.364	g/kWh	activity
EXIO Hybrid	Oil	OI	LU	728.378	g/kWh	activity
EXIO Hybrid	Oil	OI	LV	759.013	g/kWh	activity
EXIO Hybrid	Oil	OI	MT	887.177	g/kWh	activity
EXIO Hybrid	Oil	OI	NL	509.214	g/kWh	activity
EXIO Hybrid	Oil	OI	PL	748.066	g/kWh	activity
EXIO Hybrid	Oil	OI	PT	759.913	g/kWh	activity
EXIO Hybrid	Oil	OI	RO	774.732	g/kWh	activity
EXIO Hybrid	Oil	OI	SE	742.7	g/kWh	activity
EXIO Hybrid	Oil	OI	SI	856.07	g/kWh	activity
EXIO Hybrid	Oil	OI	SK	656.516	g/kWh	activity
EXIO Hybrid	Oil	OI	US	1101.14	g/kWh	activity
EXIO Hybrid	Solar	PV	AT	0.0073231	g/kWh	activity
EXIO Hybrid	Solar	PV	BE	0.000222936	g/kWh	activity
EXIO Hybrid	Solar	PV	CY	0.102444	g/kWh	activity
EXIO Hybrid	Solar	PV	CZ	6.15857e-05	g/kWh	activity
EXIO Hybrid	Solar	PV	DE	0.00593448	g/kWh	activity
EXIO Hybrid	Solar	PV	DK	0.019382	g/kWh	activity
EXIO Hybrid	Solar	PV	EL	0.000357897	g/kWh	activity
EXIO Hybrid	Solar	PV	ES	0.00850337	g/kWh	activity
EXIO Hybrid	Solar	PV	FI	0.0999754	g/kWh	activity
EXIO Hybrid	Solar	PV	FR	0.000338191	g/kWh	activity
EXIO Hybrid	Solar	PV	IT	0.000305202	g/kWh	activity
EXIO Hybrid	Solar	PV	LU	0.212321	g/kWh	activity
EXIO Hybrid	Solar	PV	NL	0.0776419	g/kWh	activity
EXIO Hybrid	Solar	PV	PT	0.0216177	g/kWh	activity
EXIO Hybrid	Solar	PV	RO	0.0537263	g/kWh	activity
EXIO Hybrid	Solar	PV	SE	0.00520226	g/kWh	activity
EXIO Hybrid	Solar	PV	US	0.0654303	g/kWh	activity
EXIO Hybrid	Solar	ST	ES	0.000721345	g/kWh	activity
EXIO Hybrid	Solar	ST	US	0.258902	g/kWh	activity
EXIO Hybrid	Tide and wave	WA	FR	0.0374295	g/kWh	activity
EXIO Hybrid	Wind	WI	AT	0.0559177	g/kWh	activity
EXIO Hybrid	Wind	WI	BE	0.0091548	g/kWh	activity
EXIO Hybrid	Wind	WI	BG	0.0156528	g/kWh	activity
EXIO Hybrid	Wind	WI	CZ	0.0274612	g/kWh	activity
EXIO Hybrid	Wind	WI	DE	0.0303235	g/kWh	activity
EXIO Hybrid	Wind	WI	DK	0.10672	g/kWh	activity
EXIO Hybrid	Wind	WI	EE	0.0597466	g/kWh	activity
EXIO Hybrid	Wind	WI	EL	0.119728	g/kWh	activity
EXIO Hybrid	Wind	WI	ES	0.0814525	g/kWh	activity
EXIO Hybrid	Wind	WI	FI	0.0488791	g/kWh	activity
EXIO Hybrid	Wind	WI	FR	0.0127812	g/kWh	activity
EXIO Hybrid	Wind	WI	HR	0.72811	g/kWh	activity
EXIO Hybrid	Wind	WI	HU	0.0935615	g/kWh	activity
EXIO Hybrid	Wind	WI	IE	0.191843	g/kWh	activity
EXIO Hybrid	Wind	WI	IT	0.0354971	g/kWh	activity
EXIO Hybrid	Wind	WI	LT	0.163593	g/kWh	activity
EXIO Hybrid	Wind	WI	LU	0.262852	g/kWh	activity
EXIO Hybrid	Wind	WI	LV	0.802733	g/kWh	activity
EXIO Hybrid	Wind	WI	NL	0.150908	g/kWh	activity
EXIO Hybrid	Wind	WI	PL	0.0760686	g/kWh	activity
EXIO Hybrid	Wind	WI	PT	0.109908	g/kWh	activity
EXIO Hybrid	Wind	WI	RO	0.00102584	g/kWh	activity
EXIO Hybrid	Wind	WI	SE	0.00448735	g/kWh	activity
EXIO Hybrid	Wind	WI	SK	0.512232	g/kWh	activity
EXIO Hybrid	Wind	WI	US	0.0984682	g/kWh	activity
IPCC	Coal	CO	Global	670	g/kWh	Median
IPCC	Natural Gas	NG	Global	370	g/kWh	Median

## Sheet: Stat analysis CI by tech
Technology	Source	n	Lower whisker (g/kWh)	Q1 (g/kWh)	Median (g/kWh)	Q3 (g/kWh)	Upper whisker (g/kWh)	IQR (g/kWh)	Mean (g/kWh)	Std Dev (g/kWh)	CV%
Biomass and waste	EXIO Hybrid	23	0.598167	2.30331	6.1074	10.8771	17.787	8.57379	7.2776	5.48824	0.754128
Biomass and waste	Electricity Maps	28	0	0	0	0	0	0	0	0
Coal	EXIO Hybrid	23	720.772	889.828	927.342	1027.14	1204.07	137.309	947.717	107.772	0.113718
Coal	Electricity Maps	28	923.04	1014.52	1037.31	1076.35	1123.53	61.82	1031.72	140.229	0.135917
Coal	IPCC	3	670	715	760	815	870	100	766.667	100.167	0.130652
Geothermal	EXIO Hybrid	4	0.0851871	0.101136	0.17258	0.259736	0.322826	0.1586	0.188293	0.112501	0.597477
Geothermal	Electricity Maps	28	0	0	0	0	0	0	2.53142	13.395	5.2915
Hydro	EXIO Hybrid	26	0.0189936	0.0820461	0.19365	0.416249	0.762886	0.334203	0.292376	0.284315	0.972428
Hydro	Electricity Maps	28	0	0	0	0	0	0	0	0
Natural Gas	EXIO Hybrid	26	468.339	538.305	632.425	671.203	794.712	132.898	654.542	190.315	0.29076
Natural Gas	Electricity Maps	28	364.25	388.842	409.295	410.39	441.99	21.5475	409.025	52.659	0.128743
Natural Gas	IPCC	3	350	360	370	430	490	70	403.333	75.7188	0.187733
Nuclear	EXIO Hybrid	14	0.021121	0.0552681	0.12229	0.292855	0.498224	0.237587	0.179369	0.147724	0.823573
Nuclear	Electricity Maps	28	0	0	0	0	0	0	0	0
Oil	EXIO Hybrid	28	509.214	667.668	757.549	827.185	980.73	159.516	774.052	156.467	0.20214
Oil	Electricity Maps	28	373.49	641.08	641.08	877.035	925.95	235.955	716.971	143.166	0.199682
Solar	EXIO Hybrid	19	6.15857e-05	0.000539621	0.00850337	0.0715361	0.102444	0.0709965	0.0494953	0.0746407	1.50804
Solar	Electricity Maps	28	0	0	0	0	0	0	0	0
Tide and wave	EXIO Hybrid	1	0.0374295	0.0374295	0.0374295	0.0374295	0.0374295	0	0.0374295		0
Wind	EXIO Hybrid	25	0.00102584	0.0303235	0.0814525	0.150908	0.262852	0.120584	0.151964	0.213719	1.40638
Wind	Electricity Maps	28	0	0	0	0	0	0	0	0
IEA values are not shown due to license restrictions

## Sheet: Footprint by technology
Source	Technology_aggr	Technology	Country	GWP100	Unit	Notes	Data from figure 1b in manuscript
Electricity Maps	Natural Gas	NG	AT	500	g/kWh	EU-ETS, ENTSO-E 2023; IPCC 2014
Electricity Maps	Natural Gas	NG	CZ	484.25	g/kWh	EU-ETS, ENTSO-E 2023; IPCC 2014
Electricity Maps	Natural Gas	NG	BE	513.56	g/kWh	EU-ETS, ENTSO-E 2023; IPCC 2014
Electricity Maps	Natural Gas	NG	DE	529.62	g/kWh	EU-ETS, ENTSO-E 2023; IPCC 2014
Electricity Maps	Natural Gas	NG	PT	495.95	g/kWh	EU-ETS, ENTSO-E 2023; IPCC 2014
Electricity Maps	Natural Gas	NG	SE	432.59	g/kWh	EU-ETS, ENTSO-E 2023; IPCC 2014
Electricity Maps	Natural Gas	NG	HU	561.99	g/kWh	EU-ETS, ENTSO-E 2023; IPCC 2014
Electricity Maps	Natural Gas	NG	DK	419.26	g/kWh	EU-ETS, ENTSO-E 2023; IPCC 2014
Electricity Maps	Natural Gas	NG	SK	634.8	g/kWh	EU-ETS, ENTSO-E 2023; IPCC 2014
Electricity Maps	Natural Gas	NG	FR	511.79	g/kWh	EU-ETS, ENTSO-E 2023; IPCC 2014
Electricity Maps	Natural Gas	NG	FI	596.61	g/kWh	EU-ETS, ENTSO-E 2023; IPCC 2014
Electricity Maps	Natural Gas	NG	EL	516.14	g/kWh	EU-ETS, ENTSO-E 2023; IPCC 2014
Electricity Maps	Natural Gas	NG	NL	524.39	g/kWh	EU-ETS, ENTSO-E 2023; IPCC 2014
Electricity Maps	Natural Gas	NG	IE	593.89	g/kWh	EU-ETS, ENTSO-E 2023; IPCC 2014
Electricity Maps	Natural Gas	NG	BG	530.39	g/kWh	EU-ETS, ENTSO-E 2023; IPCC 2014
Electricity Maps	Natural Gas	NG	CY	530.39	g/kWh	EU-ETS, ENTSO-E 2023; IPCC 2014
Electricity Maps	Natural Gas	NG	EE	530.39	g/kWh	EU-ETS, ENTSO-E 2023; IPCC 2014
Electricity Maps	Natural Gas	NG	HR	530.39	g/kWh	EU-ETS, ENTSO-E 2023; IPCC 2014
Electricity Maps	Natural Gas	NG	LU	530.39	g/kWh	EU-ETS, ENTSO-E 2023; IPCC 2014
Electricity Maps	Natural Gas	NG	MT	530.39	g/kWh	EU-ETS, ENTSO-E 2023; IPCC 2014
Electricity Maps	Natural Gas	NG	SI	530.39	g/kWh	EU-ETS, ENTSO-E 2023; IPCC 2014
Electricity Maps	Natural Gas	NG	RO	687.48	g/kWh	EU-ETS, ENTSO-E 2023; IPCC 2014
Electricity Maps	Natural Gas	NG	LV	491.24	g/kWh	EU-ETS, ENTSO-E 2023; IPCC 2014
Electricity Maps	Natural Gas	NG	IT	535.98	g/kWh	EU-ETS, ENTSO-E 2023; IPCC 2014
Electricity Maps	Natural Gas	NG	LT	495.63	g/kWh	EU-ETS, ENTSO-E 2023; IPCC 2014
Electricity Maps	Natural Gas	NG	ES	519.79	g/kWh	EU-ETS, ENTSO-E 2023; IPCC 2014
Electricity Maps	Natural Gas	NG	PL	528.97	g/kWh	EU-ETS, ENTSO-E 2023; IPCC 2014
Electricity Maps	Oil	OI	FR	901.06	g/kWh	EU-ETS, ENTSO-E 2023; IPCC 2014
Electricity Maps	Oil	OI	IT	1104.73	g/kWh	EU-ETS, ENTSO-E 2023; IPCC 2014
Electricity Maps	Oil	OI	SE	617.49	g/kWh	EU-ETS, ENTSO-E 2023; IPCC 2014
Electricity Maps	Oil	OI	AT	885.08	g/kWh	EU-ETS, ENTSO-E 2023; IPCC 2014
Electricity Maps	Oil	OI	BE	885.08	g/kWh	EU-ETS, ENTSO-E 2023; IPCC 2014
Electricity Maps	Oil	OI	CY	885.08	g/kWh	EU-ETS, ENTSO-E 2023; IPCC 2014
Electricity Maps	Oil	OI	DE	885.08	g/kWh	EU-ETS, ENTSO-E 2023; IPCC 2014
Electricity Maps	Oil	OI	DK	885.08	g/kWh	EU-ETS, ENTSO-E 2023; IPCC 2014
Electricity Maps	Oil	OI	EE	885.08	g/kWh	EU-ETS, ENTSO-E 2023; IPCC 2014
Electricity Maps	Oil	OI	ES	885.08	g/kWh	EU-ETS, ENTSO-E 2023; IPCC 2014
Electricity Maps	Oil	OI	FI	885.08	g/kWh	EU-ETS, ENTSO-E 2023; IPCC 2014
Electricity Maps	Oil	OI	HR	885.08	g/kWh	EU-ETS, ENTSO-E 2023; IPCC 2014
Electricity Maps	Oil	OI	HU	885.08	g/kWh	EU-ETS, ENTSO-E 2023; IPCC 2014
Electricity Maps	Oil	OI	IE	885.08	g/kWh	EU-ETS, ENTSO-E 2023; IPCC 2014
Electricity Maps	Oil	OI	LV	885.08	g/kWh	EU-ETS, ENTSO-E 2023; IPCC 2014
Electricity Maps	Oil	OI	MT	885.08	g/kWh	EU-ETS, ENTSO-E 2023; IPCC 2014
Electricity Maps	Oil	OI	PL	885.08	g/kWh	EU-ETS, ENTSO-E 2023; IPCC 2014
Electricity Maps	Oil	OI	RO	885.08	g/kWh	EU-ETS, ENTSO-E 2023; IPCC 2014
Electricity Maps	Oil	OI	SI	885.08	g/kWh	EU-ETS, ENTSO-E 2023; IPCC 2014
Electricity Maps	Oil	OI	SK	885.08	g/kWh	EU-ETS, ENTSO-E 2023; IPCC 2014
Electricity Maps	Oil	OI	BG	1169.95	g/kWh	EU-ETS, ENTSO-E 2022; IPCC 2014
Electricity Maps	Oil	OI	CZ	1169.95	g/kWh	EU-ETS, ENTSO-E 2022; IPCC 2014
Electricity Maps	Oil	OI	EL	1169.95	g/kWh	EU-ETS, ENTSO-E 2022; IPCC 2014
Electricity Maps	Oil	OI	LT	1169.95	g/kWh	EU-ETS, ENTSO-E 2022; IPCC 2014
Electricity Maps	Oil	OI	LU	1169.95	g/kWh	EU-ETS, ENTSO-E 2022; IPCC 2014
Electricity Maps	Oil	OI	NL	1169.95	g/kWh	EU-ETS, ENTSO-E 2022; IPCC 2014
Electricity Maps	Oil	OI	PT	1169.95	g/kWh	EU-ETS, ENTSO-E 2022; IPCC 2014
Electricity Maps	Coal	CO	LU	1135.5	g/kWh	EU-ETS, ENTSO-E 2022; IPCC 2014
Electricity Maps	Coal	CO	BE	1097.31	g/kWh	EU-ETS, ENTSO-E 2023; IPCC 2014
Electricity Maps	Coal	CO	CY	1097.31	g/kWh	EU-ETS, ENTSO-E 2023; IPCC 2014
Electricity Maps	Coal	CO	EE	1097.31	g/kWh	EU-ETS, ENTSO-E 2023; IPCC 2014
Electricity Maps	Coal	CO	HR	1097.31	g/kWh	EU-ETS, ENTSO-E 2023; IPCC 2014
Electricity Maps	Coal	CO	LT	1097.31	g/kWh	EU-ETS, ENTSO-E 2023; IPCC 2014
Electricity Maps	Coal	CO	LV	1097.31	g/kWh	EU-ETS, ENTSO-E 2023; IPCC 2014
Electricity Maps	Coal	CO	MT	1097.31	g/kWh	EU-ETS, ENTSO-E 2023; IPCC 2014
Electricity Maps	Coal	CO	SI	1097.31	g/kWh	EU-ETS, ENTSO-E 2023; IPCC 2014
Electricity Maps	Coal	CO	CZ	1111.99	g/kWh	EU-ETS, ENTSO-E 2023; IPCC 2014
Electricity Maps	Coal	CO	NL	859.37	g/kWh	EU-ETS, ENTSO-E 2023; IPCC 2014
Electricity Maps	Coal	CO	SE	1171.87	g/kWh	EU-ETS, ENTSO-E 2022; Oberschelp, Christopher, et al. "Global emission hotspots of coal power generation."
Electricity Maps	Coal	CO	SK	824.9	g/kWh	EU-ETS, ENTSO-E 2023; IPCC 2014
Electricity Maps	Coal	CO	ES	1281.36	g/kWh	EU-ETS, ENTSO-E 2023; IPCC 2014
Electricity Maps	Coal	CO	AT	1187.13	g/kWh	EU-ETS, ENTSO-E 2022; Oberschelp, Christopher, et al. "Global emission hotspots of coal power generation."
Electricity Maps	Coal	CO	BG	1183.53	g/kWh	EU-ETS, ENTSO-E 2023; IPCC 2014
Electricity Maps	Coal	CO	IT	1061.28	g/kWh	EU-ETS, ENTSO-E 2023; IPCC 2014
Electricity Maps	Coal	CO	EL	1278.46	g/kWh	EU-ETS, ENTSO-E 2023; IPCC 2014
Electricity Maps	Coal	CO	PT	1118.21	g/kWh	EU-ETS, ENTSO-E 2022; Oberschelp, Christopher, et al. "Global emission hotspots of coal power generation."
Electricity Maps	Coal	CO	DK	780.51	g/kWh	EU-ETS, ENTSO-E 2023; IPCC 2014
Electricity Maps	Coal	CO	FR	983.04	g/kWh	EU-ETS, ENTSO-E 2023; IPCC 2014
Electricity Maps	Coal	CO	FI	778.07	g/kWh	EU-ETS, ENTSO-E 2023; IPCC 2014
Electricity Maps	Coal	CO	IE	1261.64	g/kWh	EU-ETS, ENTSO-E 2023; IPCC 2014
Electricity Maps	Coal	CO	HU	1291.95	g/kWh	EU-ETS, ENTSO-E 2023; IPCC 2014
Electricity Maps	Coal	CO	RO	1284.26	g/kWh	EU-ETS, ENTSO-E 2023; IPCC 2014
Electricity Maps	Coal	CO	PL	1138.88	g/kWh	EU-ETS, ENTSO-E 2023; IPCC 2014
Electricity Maps	Coal	CO	DE	1078.94	g/kWh	EU-ETS, ENTSO-E 2023; IPCC 2014
Electricity Maps	Wind	WI	AT	12.62	g/kWh	UNECE 2022, WindEurope "Wind energy in Europe, 2021 Statistics and the outlook for 2022-2026" Wind Europe Proceedings (2021)
Electricity Maps	Wind	WI	BE	12.62	g/kWh	UNECE 2022, WindEurope "Wind energy in Europe, 2021 Statistics and the outlook for 2022-2026" Wind Europe Proceedings (2021)
Electricity Maps	Wind	WI	BG	12.62	g/kWh	UNECE 2022, WindEurope "Wind energy in Europe, 2021 Statistics and the outlook for 2022-2026" Wind Europe Proceedings (2021)
Electricity Maps	Wind	WI	CY	12.62	g/kWh	UNECE 2022, WindEurope "Wind energy in Europe, 2021 Statistics and the outlook for 2022-2026" Wind Europe Proceedings (2021)
Electricity Maps	Wind	WI	CZ	12.62	g/kWh	UNECE 2022, WindEurope "Wind energy in Europe, 2021 Statistics and the outlook for 2022-2026" Wind Europe Proceedings (2021)
Electricity Maps	Wind	WI	DE	12.62	g/kWh	UNECE 2022, WindEurope "Wind energy in Europe, 2021 Statistics and the outlook for 2022-2026" Wind Europe Proceedings (2021)
Electricity Maps	Wind	WI	DK	12.62	g/kWh	UNECE 2022, WindEurope "Wind energy in Europe, 2021 Statistics and the outlook for 2022-2026" Wind Europe Proceedings (2021)
Electricity Maps	Wind	WI	EE	12.62	g/kWh	UNECE 2022, WindEurope "Wind energy in Europe, 2021 Statistics and the outlook for 2022-2026" Wind Europe Proceedings (2021)
Electricity Maps	Wind	WI	ES	12.62	g/kWh	UNECE 2022, WindEurope "Wind energy in Europe, 2021 Statistics and the outlook for 2022-2026" Wind Europe Proceedings (2021)
Electricity Maps	Wind	WI	FI	12.62	g/kWh	UNECE 2022, WindEurope "Wind energy in Europe, 2021 Statistics and the outlook for 2022-2026" Wind Europe Proceedings (2021)
Electricity Maps	Wind	WI	FR	12.62	g/kWh	UNECE 2022, WindEurope "Wind energy in Europe, 2021 Statistics and the outlook for 2022-2026" Wind Europe Proceedings (2021)
Electricity Maps	Wind	WI	EL	12.62	g/kWh	UNECE 2022, WindEurope "Wind energy in Europe, 2021 Statistics and the outlook for 2022-2026" Wind Europe Proceedings (2021)
Electricity Maps	Wind	WI	HR	12.62	g/kWh	UNECE 2022, WindEurope "Wind energy in Europe, 2021 Statistics and the outlook for 2022-2026" Wind Europe Proceedings (2021)
Electricity Maps	Wind	WI	HU	12.62	g/kWh	UNECE 2022, WindEurope "Wind energy in Europe, 2021 Statistics and the outlook for 2022-2026" Wind Europe Proceedings (2021)
Electricity Maps	Wind	WI	IE	12.62	g/kWh	UNECE 2022, WindEurope "Wind energy in Europe, 2021 Statistics and the outlook for 2022-2026" Wind Europe Proceedings (2021)
Electricity Maps	Wind	WI	IT	12.62	g/kWh	UNECE 2022, WindEurope "Wind energy in Europe, 2021 Statistics and the outlook for 2022-2026" Wind Europe Proceedings (2021)
Electricity Maps	Wind	WI	LT	12.62	g/kWh	UNECE 2022, WindEurope "Wind energy in Europe, 2021 Statistics and the outlook for 2022-2026" Wind Europe Proceedings (2021)
Electricity Maps	Wind	WI	LU	12.62	g/kWh	UNECE 2022, WindEurope "Wind energy in Europe, 2021 Statistics and the outlook for 2022-2026" Wind Europe Proceedings (2021)
Electricity Maps	Wind	WI	LV	12.62	g/kWh	UNECE 2022, WindEurope "Wind energy in Europe, 2021 Statistics and the outlook for 2022-2026" Wind Europe Proceedings (2021)
Electricity Maps	Wind	WI	MT	12.62	g/kWh	UNECE 2022, WindEurope "Wind energy in Europe, 2021 Statistics and the outlook for 2022-2026" Wind Europe Proceedings (2021)
Electricity Maps	Wind	WI	NL	12.62	g/kWh	UNECE 2022, WindEurope "Wind energy in Europe, 2021 Statistics and the outlook for 2022-2026" Wind Europe Proceedings (2021)
Electricity Maps	Wind	WI	PL	12.62	g/kWh	UNECE 2022, WindEurope "Wind energy in Europe, 2021 Statistics and the outlook for 2022-2026" Wind Europe Proceedings (2021)
Electricity Maps	Wind	WI	PT	12.62	g/kWh	UNECE 2022, WindEurope "Wind energy in Europe, 2021 Statistics and the outlook for 2022-2026" Wind Europe Proceedings (2021)
Electricity Maps	Wind	WI	RO	12.62	g/kWh	UNECE 2022, WindEurope "Wind energy in Europe, 2021 Statistics and the outlook for 2022-2026" Wind Europe Proceedings (2021)
Electricity Maps	Wind	WI	SE	12.62	g/kWh	UNECE 2022, WindEurope "Wind energy in Europe, 2021 Statistics and the outlook for 2022-2026" Wind Europe Proceedings (2021)
Electricity Maps	Wind	WI	SI	12.62	g/kWh	UNECE 2022, WindEurope "Wind energy in Europe, 2021 Statistics and the outlook for 2022-2026" Wind Europe Proceedings (2021)
Electricity Maps	Wind	WI	SK	12.62	g/kWh	UNECE 2022, WindEurope "Wind energy in Europe, 2021 Statistics and the outlook for 2022-2026" Wind Europe Proceedings (2021)
Electricity Maps	Hydro	HY	AT	10.7	g/kWh	UNECE 2022
Electricity Maps	Hydro	HY	BE	10.7	g/kWh	UNECE 2022
Electricity Maps	Hydro	HY	BG	10.7	g/kWh	UNECE 2022
Electricity Maps	Hydro	HY	CY	10.7	g/kWh	UNECE 2022
Electricity Maps	Hydro	HY	CZ	10.7	g/kWh	UNECE 2022
Electricity Maps	Hydro	HY	DE	10.7	g/kWh	UNECE 2022
Electricity Maps	Hydro	HY	DK	10.7	g/kWh	UNECE 2022
Electricity Maps	Hydro	HY	EE	10.7	g/kWh	UNECE 2022
Electricity Maps	Hydro	HY	ES	10.7	g/kWh	UNECE 2022
Electricity Maps	Hydro	HY	FI	10.7	g/kWh	UNECE 2022
Electricity Maps	Hydro	HY	FR	10.7	g/kWh	UNECE 2022
Electricity Maps	Hydro	HY	EL	10.7	g/kWh	UNECE 2022
Electricity Maps	Hydro	HY	HR	10.7	g/kWh	UNECE 2022
Electricity Maps	Hydro	HY	HU	10.7	g/kWh	UNECE 2022
Electricity Maps	Hydro	HY	IE	10.7	g/kWh	UNECE 2022
Electricity Maps	Hydro	HY	IT	10.7	g/kWh	UNECE 2022
Electricity Maps	Hydro	HY	LT	10.7	g/kWh	UNECE 2022
Electricity Maps	Hydro	HY	LU	10.7	g/kWh	UNECE 2022
Electricity Maps	Hydro	HY	LV	10.7	g/kWh	UNECE 2022
Electricity Maps	Hydro	HY	MT	10.7	g/kWh	UNECE 2022
Electricity Maps	Hydro	HY	NL	10.7	g/kWh	UNECE 2022
Electricity Maps	Hydro	HY	PL	10.7	g/kWh	UNECE 2022
Electricity Maps	Hydro	HY	PT	10.7	g/kWh	UNECE 2022
Electricity Maps	Hydro	HY	RO	10.7	g/kWh	UNECE 2022
Electricity Maps	Hydro	HY	SE	10.7	g/kWh	UNECE 2022
Electricity Maps	Hydro	HY	SI	10.7	g/kWh	UNECE 2022
Electricity Maps	Hydro	HY	SK	10.7	g/kWh	UNECE 2022
Electricity Maps	Solar	SO	AT	31	g/kWh	INCER ACV
Electricity Maps	Solar	SO	BE	36	g/kWh	INCER ACV
Electricity Maps	Solar	SO	EE	36.5	g/kWh	INCER ACV
Electricity Maps	Solar	SO	NL	36.5	g/kWh	INCER ACV
Electricity Maps	Solar	SO	SK	33	g/kWh	INCER ACV
Electricity Maps	Solar	SO	FI	45	g/kWh	IPCC 2014
Electricity Maps	Solar	SO	LU	45	g/kWh	IPCC 2014
Electricity Maps	Solar	SO	MT	45	g/kWh	IPCC 2014
Electricity Maps	Solar	SO	SE	40.8167	g/kWh	INCER ACV
Electricity Maps	Solar	SO	CZ	34.3333	g/kWh	INCER ACV
Electricity Maps	Solar	SO	FR	30.075	g/kWh	INCER ACV
Electricity Maps	Solar	SO	LV	36.9	g/kWh	INCER ACV
Electricity Maps	Solar	SO	RO	29.78	g/kWh	INCER ACV
Electricity Maps	Solar	SO	SI	30.8333	g/kWh	INCER ACV
Electricity Maps	Solar	SO	DE	35.1167	g/kWh	INCER ACV
Electricity Maps	Solar	SO	HR	29.0333	g/kWh	INCER ACV
Electricity Maps	Solar	SO	ES	26.4667	g/kWh	INCER ACV
Electricity Maps	Solar	SO	IE	42.1333	g/kWh	INCER ACV
Electricity Maps	Solar	SO	EL	26.1	g/kWh	INCER ACV
Electricity Maps	Solar	SO	LT	36.7	g/kWh	INCER ACV
Electricity Maps	Solar	SO	CY	25.6	g/kWh	INCER ACV
Electricity Maps	Solar	SO	PT	25.6	g/kWh	INCER ACV
Electricity Maps	Solar	SO	IT	26.2653	g/kWh	INCER ACV
Electricity Maps	Solar	SO	BG	27.7333	g/kWh	INCER ACV
Electricity Maps	Solar	SO	HU	30.6667	g/kWh	INCER ACV
Electricity Maps	Solar	SO	DK	35.9889	g/kWh	INCER ACV
Electricity Maps	Solar	SO	PL	34.84	g/kWh	INCER ACV
Electricity Maps	Biomass and waste	BWB	AT	230	g/kWh	BEIS 2021; IPCC 2014
Electricity Maps	Biomass and waste	BWB	BE	230	g/kWh	BEIS 2021; IPCC 2014
Electricity Maps	Biomass and waste	BWB	BG	230	g/kWh	BEIS 2021; IPCC 2014
Electricity Maps	Biomass and waste	BWB	CY	230	g/kWh	BEIS 2021; IPCC 2014
Electricity Maps	Biomass and waste	BWB	CZ	230	g/kWh	BEIS 2021; IPCC 2014
Electricity Maps	Biomass and waste	BWB	DE	230	g/kWh	BEIS 2021; IPCC 2014
Electricity Maps	Biomass and waste	BWB	DK	230	g/kWh	BEIS 2021; IPCC 2014
Electricity Maps	Biomass and waste	BWB	EE	230	g/kWh	BEIS 2021; IPCC 2014
Electricity Maps	Biomass and waste	BWB	ES	230	g/kWh	BEIS 2021; IPCC 2014
Electricity Maps	Biomass and waste	BWB	FI	230	g/kWh	BEIS 2021; IPCC 2014
Electricity Maps	Biomass and waste	BWB	FR	230	g/kWh	BEIS 2021; IPCC 2014
Electricity Maps	Biomass and waste	BWB	EL	230	g/kWh	BEIS 2021; IPCC 2014
Electricity Maps	Biomass and waste	BWB	HR	230	g/kWh	BEIS 2021; IPCC 2014
Electricity Maps	Biomass and waste	BWB	HU	230	g/kWh	BEIS 2021; IPCC 2014
Electricity Maps	Biomass and waste	BWB	IE	230	g/kWh	BEIS 2021; IPCC 2014
Electricity Maps	Biomass and waste	BWB	IT	230	g/kWh	BEIS 2021; IPCC 2014
Electricity Maps	Biomass and waste	BWB	LT	230	g/kWh	BEIS 2021; IPCC 2014
Electricity Maps	Biomass and waste	BWB	LU	230	g/kWh	BEIS 2021; IPCC 2014
Electricity Maps	Biomass and waste	BWB	LV	230	g/kWh	BEIS 2021; IPCC 2014
Electricity Maps	Biomass and waste	BWB	MT	230	g/kWh	BEIS 2021; IPCC 2014
Electricity Maps	Biomass and waste	BWB	NL	230	g/kWh	BEIS 2021; IPCC 2014
Electricity Maps	Biomass and waste	BWB	PL	230	g/kWh	BEIS 2021; IPCC 2014
Electricity Maps	Biomass and waste	BWB	PT	230	g/kWh	BEIS 2021; IPCC 2014
Electricity Maps	Biomass and waste	BWB	RO	230	g/kWh	BEIS 2021; IPCC 2014
Electricity Maps	Biomass and waste	BWB	SE	230	g/kWh	BEIS 2021; IPCC 2014
Electricity Maps	Biomass and waste	BWB	SI	230	g/kWh	BEIS 2021; IPCC 2014
Electricity Maps	Biomass and waste	BWB	SK	230	g/kWh	BEIS 2021; IPCC 2014
Electricity Maps	Nuclear	NU	AT	5.13	g/kWh	UNECE 2022
Electricity Maps	Nuclear	NU	BE	5.13	g/kWh	UNECE 2022
Electricity Maps	Nuclear	NU	BG	5.13	g/kWh	UNECE 2022
Electricity Maps	Nuclear	NU	CY	5.13	g/kWh	UNECE 2022
Electricity Maps	Nuclear	NU	CZ	5.13	g/kWh	UNECE 2022
Electricity Maps	Nuclear	NU	DE	5.13	g/kWh	UNECE 2022
Electricity Maps	Nuclear	NU	DK	5.13	g/kWh	UNECE 2022
Electricity Maps	Nuclear	NU	EE	5.13	g/kWh	UNECE 2022
Electricity Maps	Nuclear	NU	ES	5.13	g/kWh	UNECE 2022
Electricity Maps	Nuclear	NU	FI	5.13	g/kWh	UNECE 2022
Electricity Maps	Nuclear	NU	FR	5.13	g/kWh	UNECE 2022
Electricity Maps	Nuclear	NU	EL	5.13	g/kWh	UNECE 2022
Electricity Maps	Nuclear	NU	HR	5.13	g/kWh	UNECE 2022
Electricity Maps	Nuclear	NU	HU	5.13	g/kWh	UNECE 2022
Electricity Maps	Nuclear	NU	IE	5.13	g/kWh	UNECE 2022
Electricity Maps	Nuclear	NU	IT	5.13	g/kWh	UNECE 2022
Electricity Maps	Nuclear	NU	LT	5.13	g/kWh	UNECE 2022
Electricity Maps	Nuclear	NU	LU	5.13	g/kWh	UNECE 2022
Electricity Maps	Nuclear	NU	LV	5.13	g/kWh	UNECE 2022
Electricity Maps	Nuclear	NU	MT	5.13	g/kWh	UNECE 2022
Electricity Maps	Nuclear	NU	NL	5.13	g/kWh	UNECE 2022
Electricity Maps	Nuclear	NU	PL	5.13	g/kWh	UNECE 2022
Electricity Maps	Nuclear	NU	PT	5.13	g/kWh	UNECE 2022
Electricity Maps	Nuclear	NU	RO	5.13	g/kWh	UNECE 2022
Electricity Maps	Nuclear	NU	SE	5.13	g/kWh	UNECE 2022
Electricity Maps	Nuclear	NU	SI	5.13	g/kWh	UNECE 2022
Electricity Maps	Nuclear	NU	SK	5.13	g/kWh	UNECE 2022
Electricity Maps	Nec	NC	HR	240	g/kWh	HOPS 2018; HOPS 2018 derived calculation
Electricity Maps	Nec	NC	SE	258	g/kWh	assumes 98.26% biomass, 1.09% oil, 0.64% peat, 0.01% coal
Electricity Maps	Nec	NC	NL	342	g/kWh	Electricity Maps, 2020 average. See disclaimer
Electricity Maps	Nec	NC	AT	700	g/kWh	assumes thermal (coal, gas, oil or biomass)
Electricity Maps	Nec	NC	BE	700	g/kWh	assumes thermal (coal, gas, oil or biomass)
Electricity Maps	Nec	NC	BG	700	g/kWh	assumes thermal (coal, gas, oil or biomass)
Electricity Maps	Nec	NC	CY	700	g/kWh	assumes thermal (coal, gas, oil or biomass)
Electricity Maps	Nec	NC	CZ	700	g/kWh	assumes thermal (coal, gas, oil or biomass)
Electricity Maps	Nec	NC	DE	700	g/kWh	assumes thermal (coal, gas, oil or biomass)
Electricity Maps	Nec	NC	DK	700	g/kWh	assumes thermal (coal, gas, oil or biomass)
Electricity Maps	Nec	NC	EE	700	g/kWh	assumes thermal (coal, gas, oil or biomass)
Electricity Maps	Nec	NC	ES	700	g/kWh	assumes thermal (coal, gas, oil or biomass)
Electricity Maps	Nec	NC	FI	700	g/kWh	assumes thermal (coal, gas, oil or biomass)
Electricity Maps	Nec	NC	FR	700	g/kWh	assumes thermal (coal, gas, oil or biomass)
Electricity Maps	Nec	NC	EL	700	g/kWh	assumes thermal (coal, gas, oil or biomass)
Electricity Maps	Nec	NC	HU	700	g/kWh	assumes thermal (coal, gas, oil or biomass)
Electricity Maps	Nec	NC	IE	700	g/kWh	assumes thermal (coal, gas, oil or biomass)
Electricity Maps	Nec	NC	IT	700	g/kWh	assumes thermal (coal, gas, oil or biomass)
Electricity Maps	Nec	NC	LT	700	g/kWh	assumes thermal (coal, gas, oil or biomass)
Electricity Maps	Nec	NC	LU	700	g/kWh	assumes thermal (coal, gas, oil or biomass)
Electricity Maps	Nec	NC	LV	700	g/kWh	assumes thermal (coal, gas, oil or biomass)
Electricity Maps	Nec	NC	MT	700	g/kWh	assumes thermal (coal, gas, oil or biomass)
Electricity Maps	Nec	NC	PL	700	g/kWh	assumes thermal (coal, gas, oil or biomass)
Electricity Maps	Nec	NC	PT	700	g/kWh	assumes thermal (coal, gas, oil or biomass)
Electricity Maps	Nec	NC	RO	700	g/kWh	assumes thermal (coal, gas, oil or biomass)
Electricity Maps	Nec	NC	SI	700	g/kWh	assumes thermal (coal, gas, oil or biomass)
Electricity Maps	Nec	NC	SK	700	g/kWh	assumes thermal (coal, gas, oil or biomass)
Electricity Maps	Geothermal	GE	AT	38	g/kWh	IPCC 2014
Electricity Maps	Geothermal	GE	BE	38	g/kWh	IPCC 2014
Electricity Maps	Geothermal	GE	BG	38	g/kWh	IPCC 2014
Electricity Maps	Geothermal	GE	CY	38	g/kWh	IPCC 2014
Electricity Maps	Geothermal	GE	CZ	38	g/kWh	IPCC 2014
Electricity Maps	Geothermal	GE	DE	38	g/kWh	IPCC 2014
Electricity Maps	Geothermal	GE	DK	38	g/kWh	IPCC 2014
Electricity Maps	Geothermal	GE	EE	38	g/kWh	IPCC 2014
Electricity Maps	Geothermal	GE	ES	38	g/kWh	IPCC 2014
Electricity Maps	Geothermal	GE	FI	38	g/kWh	IPCC 2014
Electricity Maps	Geothermal	GE	FR	38	g/kWh	IPCC 2014
Electricity Maps	Geothermal	GE	EL	38	g/kWh	IPCC 2014
Electricity Maps	Geothermal	GE	HR	38	g/kWh	IPCC 2014
Electricity Maps	Geothermal	GE	HU	38	g/kWh	IPCC 2014
Electricity Maps	Geothermal	GE	IE	38	g/kWh	IPCC 2014
Electricity Maps	Geothermal	GE	IT	38	g/kWh	IPCC 2014
Electricity Maps	Geothermal	GE	LT	38	g/kWh	IPCC 2014
Electricity Maps	Geothermal	GE	LU	38	g/kWh	IPCC 2014
Electricity Maps	Geothermal	GE	LV	38	g/kWh	IPCC 2014
Electricity Maps	Geothermal	GE	MT	38	g/kWh	IPCC 2014
Electricity Maps	Geothermal	GE	NL	38	g/kWh	IPCC 2014
Electricity Maps	Geothermal	GE	PL	38	g/kWh	IPCC 2014
Electricity Maps	Geothermal	GE	PT	38	g/kWh	IPCC 2014
Electricity Maps	Geothermal	GE	RO	38	g/kWh	IPCC 2014
Electricity Maps	Geothermal	GE	SE	38	g/kWh	IPCC 2014
Electricity Maps	Geothermal	GE	SI	38	g/kWh	IPCC 2014
Electricity Maps	Geothermal	GE	SK	38	g/kWh	IPCC 2014
EXIO Hybrid	Biomass and waste	BW	AT	225.473	g/kWh	Activity
EXIO Hybrid	Biomass and waste	BW	BE	24.8923	g/kWh	Activity
EXIO Hybrid	Biomass and waste	BW	CZ	446.434	g/kWh	Activity
EXIO Hybrid	Biomass and waste	BW	DE	28.1561	g/kWh	Activity
EXIO Hybrid	Biomass and waste	BW	DK	22.5517	g/kWh	Activity
EXIO Hybrid	Biomass and waste	BW	EE	34.4181	g/kWh	Activity
EXIO Hybrid	Biomass and waste	BW	ES	69.0119	g/kWh	Activity
EXIO Hybrid	Biomass and waste	BW	FI	44.5167	g/kWh	Activity
EXIO Hybrid	Biomass and waste	BW	FR	36.761	g/kWh	Activity
EXIO Hybrid	Biomass and waste	BW	HR	204.126	g/kWh	Activity
EXIO Hybrid	Biomass and waste	BW	HU	97.3364	g/kWh	Activity
EXIO Hybrid	Biomass and waste	BW	IE	51.282	g/kWh	Activity
EXIO Hybrid	Biomass and waste	BW	IT	306.945	g/kWh	Activity
EXIO Hybrid	Biomass and waste	BW	LT	122.027	g/kWh	Activity
EXIO Hybrid	Biomass and waste	BW	LV	106.6	g/kWh	Activity
EXIO Hybrid	Biomass and waste	BW	NL	23.9673	g/kWh	Activity
EXIO Hybrid	Biomass and waste	BW	PL	117.834	g/kWh	Activity
EXIO Hybrid	Biomass and waste	BW	PT	43.7742	g/kWh	Activity
EXIO Hybrid	Biomass and waste	BW	RO	47.583	g/kWh	Activity
EXIO Hybrid	Biomass and waste	BW	SE	36.6133	g/kWh	Activity
EXIO Hybrid	Biomass and waste	BW	SI	186.401	g/kWh	Activity
EXIO Hybrid	Biomass and waste	BW	SK	230.992	g/kWh	Activity
EXIO Hybrid	Coal	CO	AT	1694.67	g/kWh	Activity
EXIO Hybrid	Coal	CO	BE	1754.43	g/kWh	Activity
EXIO Hybrid	Coal	CO	BG	1649.06	g/kWh	Activity
EXIO Hybrid	Coal	CO	CZ	2103.59	g/kWh	Activity
EXIO Hybrid	Coal	CO	DE	1317.23	g/kWh	Activity
EXIO Hybrid	Coal	CO	DK	1841.42	g/kWh	Activity
EXIO Hybrid	Coal	CO	EE	1302.8	g/kWh	Activity
EXIO Hybrid	Coal	CO	EL	1362.04	g/kWh	Activity
EXIO Hybrid	Coal	CO	ES	1986.71	g/kWh	Activity
EXIO Hybrid	Coal	CO	FI	1597.25	g/kWh	Activity
EXIO Hybrid	Coal	CO	FR	1548.08	g/kWh	Activity
EXIO Hybrid	Coal	CO	HR	1672.66	g/kWh	Activity
EXIO Hybrid	Coal	CO	HU	1293.68	g/kWh	Activity
EXIO Hybrid	Coal	CO	IE	1330.29	g/kWh	Activity
EXIO Hybrid	Coal	CO	IT	1751.54	g/kWh	Activity
EXIO Hybrid	Coal	CO	NL	1388.52	g/kWh	Activity
EXIO Hybrid	Coal	CO	PL	1875.71	g/kWh	Activity
EXIO Hybrid	Coal	CO	PT	1708.15	g/kWh	Activity
EXIO Hybrid	Coal	CO	RO	1275.08	g/kWh	Activity
EXIO Hybrid	Coal	CO	SE	1656.34	g/kWh	Activity
EXIO Hybrid	Coal	CO	SI	1174.36	g/kWh	Activity
EXIO Hybrid	Coal	CO	SK	1651.72	g/kWh	Activity
EXIO Hybrid	Geothermal	GE	AT	85.4663	g/kWh	Activity
EXIO Hybrid	Geothermal	GE	DE	10.6781	g/kWh	Activity
EXIO Hybrid	Geothermal	GE	IT	58.0824	g/kWh	Activity
EXIO Hybrid	Geothermal	GE	PT	94.7948	g/kWh	Activity
EXIO Hybrid	Hydro	HY	AT	57.0723	g/kWh	Activity
EXIO Hybrid	Hydro	HY	BE	76.0453	g/kWh	Activity
EXIO Hybrid	Hydro	HY	BG	13.6144	g/kWh	Activity
EXIO Hybrid	Hydro	HY	CZ	30.7341	g/kWh	Activity
EXIO Hybrid	Hydro	HY	DE	8.53957	g/kWh	Activity
EXIO Hybrid	Hydro	HY	DK	32.0502	g/kWh	Activity
EXIO Hybrid	Hydro	HY	EE	33.4147	g/kWh	Activity
EXIO Hybrid	Hydro	HY	EL	14.1965	g/kWh	Activity
EXIO Hybrid	Hydro	HY	ES	12.3694	g/kWh	Activity
EXIO Hybrid	Hydro	HY	FI	11.8233	g/kWh	Activity
EXIO Hybrid	Hydro	HY	FR	9.61742	g/kWh	Activity
EXIO Hybrid	Hydro	HY	HR	24.2499	g/kWh	Activity
EXIO Hybrid	Hydro	HY	HU	93.0413	g/kWh	Activity
EXIO Hybrid	Hydro	HY	IE	27.0077	g/kWh	Activity
EXIO Hybrid	Hydro	HY	IT	29.4075	g/kWh	Activity
EXIO Hybrid	Hydro	HY	LT	79.9569	g/kWh	Activity
EXIO Hybrid	Hydro	HY	LU	200.766	g/kWh	Activity
EXIO Hybrid	Hydro	HY	LV	23.3378	g/kWh	Activity
EXIO Hybrid	Hydro	HY	NL	98.5003	g/kWh	Activity
EXIO Hybrid	Hydro	HY	PL	70.8822	g/kWh	Activity
EXIO Hybrid	Hydro	HY	PT	21.0203	g/kWh	Activity
EXIO Hybrid	Hydro	HY	RO	10.2872	g/kWh	Activity
EXIO Hybrid	Hydro	HY	SE	8.11634	g/kWh	Activity
EXIO Hybrid	Hydro	HY	SI	26.2038	g/kWh	Activity
EXIO Hybrid	Hydro	HY	SK	48.125	g/kWh	Activity
EXIO Hybrid	Nec	NC	AT	141.187	g/kWh	Activity
EXIO Hybrid	Nec	NC	BE	296.087	g/kWh	Activity
EXIO Hybrid	Nec	NC	BG	72.7895	g/kWh	Activity
EXIO Hybrid	Nec	NC	FI	352.688	g/kWh	Activity
EXIO Hybrid	Nec	NC	LT	296.069	g/kWh	Activity
EXIO Hybrid	Nec	NC	NL	53.5515	g/kWh	Activity
EXIO Hybrid	Natural Gas	NG	AT	2043.28	g/kWh	Activity
EXIO Hybrid	Natural Gas	NG	BE	1040.55	g/kWh	Activity
EXIO Hybrid	Natural Gas	NG	BG	826.931	g/kWh	Activity
EXIO Hybrid	Natural Gas	NG	CZ	1391.6	g/kWh	Activity
EXIO Hybrid	Natural Gas	NG	DE	1735.1	g/kWh	Activity
EXIO Hybrid	Natural Gas	NG	DK	899.04	g/kWh	Activity
EXIO Hybrid	Natural Gas	NG	EE	856.238	g/kWh	Activity
EXIO Hybrid	Natural Gas	NG	EL	850.628	g/kWh	Activity
EXIO Hybrid	Natural Gas	NG	ES	961.239	g/kWh	Activity
EXIO Hybrid	Natural Gas	NG	FI	5193.62	g/kWh	Activity
EXIO Hybrid	Natural Gas	NG	FR	1818.27	g/kWh	Activity
EXIO Hybrid	Natural Gas	NG	HR	823.512	g/kWh	Activity
EXIO Hybrid	Natural Gas	NG	HU	917.393	g/kWh	Activity
EXIO Hybrid	Natural Gas	NG	IE	816.962	g/kWh	Activity
EXIO Hybrid	Natural Gas	NG	IT	1157.41	g/kWh	Activity
EXIO Hybrid	Natural Gas	NG	LT	1035.05	g/kWh	Activity
EXIO Hybrid	Natural Gas	NG	LU	782.883	g/kWh	Activity
EXIO Hybrid	Natural Gas	NG	LV	1014.94	g/kWh	Activity
EXIO Hybrid	Natural Gas	NG	NL	874.917	g/kWh	Activity
EXIO Hybrid	Natural Gas	NG	PL	1531.39	g/kWh	Activity
EXIO Hybrid	Natural Gas	NG	PT	880.261	g/kWh	Activity
EXIO Hybrid	Natural Gas	NG	RO	1137.53	g/kWh	Activity
EXIO Hybrid	Natural Gas	NG	SE	2947.93	g/kWh	Activity
EXIO Hybrid	Natural Gas	NG	SI	830.79	g/kWh	Activity
EXIO Hybrid	Natural Gas	NG	SK	1172.92	g/kWh	Activity
EXIO Hybrid	Nuclear	NU	BE	42.8962	g/kWh	Activity
EXIO Hybrid	Nuclear	NU	BG	9.47539	g/kWh	Activity
EXIO Hybrid	Nuclear	NU	CZ	47.9384	g/kWh	Activity
EXIO Hybrid	Nuclear	NU	DE	25.2447	g/kWh	Activity
EXIO Hybrid	Nuclear	NU	ES	20.6563	g/kWh	Activity
EXIO Hybrid	Nuclear	NU	FI	44.9901	g/kWh	Activity
EXIO Hybrid	Nuclear	NU	FR	21.2997	g/kWh	Activity
EXIO Hybrid	Nuclear	NU	HU	21.3137	g/kWh	Activity
EXIO Hybrid	Nuclear	NU	NL	84.582	g/kWh	Activity
EXIO Hybrid	Nuclear	NU	RO	6.54843	g/kWh	Activity
EXIO Hybrid	Nuclear	NU	SE	8.01208	g/kWh	Activity
EXIO Hybrid	Nuclear	NU	SI	52.5632	g/kWh	Activity
EXIO Hybrid	Nuclear	NU	SK	27.898	g/kWh	Activity
EXIO Hybrid	Oil	OI	AT	1513.1	g/kWh	Activity
EXIO Hybrid	Oil	OI	BE	1694.09	g/kWh	Activity
EXIO Hybrid	Oil	OI	BG	2694.98	g/kWh	Activity
EXIO Hybrid	Oil	OI	CY	1664.19	g/kWh	Activity
EXIO Hybrid	Oil	OI	CZ	2685.98	g/kWh	Activity
EXIO Hybrid	Oil	OI	DE	1386.26	g/kWh	Activity
EXIO Hybrid	Oil	OI	DK	1483.03	g/kWh	Activity
EXIO Hybrid	Oil	OI	EE	1628.6	g/kWh	Activity
EXIO Hybrid	Oil	OI	EL	2380.36	g/kWh	Activity
EXIO Hybrid	Oil	OI	ES	1707.25	g/kWh	Activity
EXIO Hybrid	Oil	OI	FI	1781.88	g/kWh	Activity
EXIO Hybrid	Oil	OI	FR	1864.71	g/kWh	Activity
EXIO Hybrid	Oil	OI	HR	1439.27	g/kWh	Activity
EXIO Hybrid	Oil	OI	HU	2662.8	g/kWh	Activity
EXIO Hybrid	Oil	OI	IE	1770.87	g/kWh	Activity
EXIO Hybrid	Oil	OI	IT	1810.49	g/kWh	Activity
EXIO Hybrid	Oil	OI	LT	1882.6	g/kWh	Activity
EXIO Hybrid	Oil	OI	LU	1528.4	g/kWh	Activity
EXIO Hybrid	Oil	OI	LV	1722.74	g/kWh	Activity
EXIO Hybrid	Oil	OI	MT	1943.35	g/kWh	Activity
EXIO Hybrid	Oil	OI	NL	1209.84	g/kWh	Activity
EXIO Hybrid	Oil	OI	PL	1870.01	g/kWh	Activity
EXIO Hybrid	Oil	OI	PT	1779.6	g/kWh	Activity
EXIO Hybrid	Oil	OI	RO	1873.08	g/kWh	Activity
EXIO Hybrid	Oil	OI	SE	1681.1	g/kWh	Activity
EXIO Hybrid	Oil	OI	SI	1939.92	g/kWh	Activity
EXIO Hybrid	Oil	OI	SK	1531.96	g/kWh	Activity
EXIO Hybrid	Solar	PV	AT	47.09	g/kWh	Activity
EXIO Hybrid	Solar	PV	BE	27.368	g/kWh	Activity
EXIO Hybrid	Solar	PV	BG	20.548	g/kWh	Activity
EXIO Hybrid	Solar	PV	CY	93.6312	g/kWh	Activity
EXIO Hybrid	Solar	PV	CZ	18.827	g/kWh	Activity
EXIO Hybrid	Solar	PV	DE	10.5007	g/kWh	Activity
EXIO Hybrid	Solar	PV	DK	26.4443	g/kWh	Activity
EXIO Hybrid	Solar	PV	EL	22.4997	g/kWh	Activity
EXIO Hybrid	Solar	PV	ES	20.0095	g/kWh	Activity
EXIO Hybrid	Solar	PV	FI	50.5598	g/kWh	Activity
EXIO Hybrid	Solar	PV	FR	84.7302	g/kWh	Activity
EXIO Hybrid	Solar	PV	HU	49.8058	g/kWh	Activity
EXIO Hybrid	Solar	PV	IT	38.271	g/kWh	Activity
EXIO Hybrid	Solar	PV	LU	78.4668	g/kWh	Activity
EXIO Hybrid	Solar	PV	MT	290.625	g/kWh	Activity
EXIO Hybrid	Solar	PV	NL	73.2298	g/kWh	Activity
EXIO Hybrid	Solar	PV	PT	72.0324	g/kWh	Activity
EXIO Hybrid	Solar	PV	RO	56.4288	g/kWh	Activity
EXIO Hybrid	Solar	PV	SE	4.1116	g/kWh	Activity
EXIO Hybrid	Solar	PV	SI	41.5958	g/kWh	Activity
EXIO Hybrid	Solar	PV	SK	99.1202	g/kWh	Activity
EXIO Hybrid	Solar	ST	ES	56.3985	g/kWh	Activity
EXIO Hybrid	Tide and wave	WA	FR	124.214	g/kWh	Activity
EXIO Hybrid	Wind	WI	AT	17.1435	g/kWh	Activity
EXIO Hybrid	Wind	WI	BE	10.2159	g/kWh	Activity
EXIO Hybrid	Wind	WI	BG	15.6646	g/kWh	Activity
EXIO Hybrid	Wind	WI	CY	31.3324	g/kWh	Activity
EXIO Hybrid	Wind	WI	CZ	40.0691	g/kWh	Activity
EXIO Hybrid	Wind	WI	DE	8.08964	g/kWh	Activity
EXIO Hybrid	Wind	WI	DK	36.3334	g/kWh	Activity
EXIO Hybrid	Wind	WI	EE	26.0441	g/kWh	Activity
EXIO Hybrid	Wind	WI	EL	16.4936	g/kWh	Activity
EXIO Hybrid	Wind	WI	ES	12.1621	g/kWh	Activity
EXIO Hybrid	Wind	WI	FI	36.3182	g/kWh	Activity
EXIO Hybrid	Wind	WI	FR	19.1593	g/kWh	Activity
EXIO Hybrid	Wind	WI	HR	10.5107	g/kWh	Activity
EXIO Hybrid	Wind	WI	HU	56.3151	g/kWh	Activity
EXIO Hybrid	Wind	WI	IE	11.9621	g/kWh	Activity
EXIO Hybrid	Wind	WI	IT	42.2389	g/kWh	Activity
EXIO Hybrid	Wind	WI	LT	71.4709	g/kWh	Activity
EXIO Hybrid	Wind	WI	LU	203.081	g/kWh	Activity
EXIO Hybrid	Wind	WI	LV	85.1458	g/kWh	Activity
EXIO Hybrid	Wind	WI	NL	8.40444	g/kWh	Activity
EXIO Hybrid	Wind	WI	PL	52.6212	g/kWh	Activity
EXIO Hybrid	Wind	WI	PT	15.9801	g/kWh	Activity
EXIO Hybrid	Wind	WI	RO	16.9459	g/kWh	Activity
EXIO Hybrid	Wind	WI	SE	28.0223	g/kWh	Activity
EXIO Hybrid	Wind	WI	SK	149.058	g/kWh	Activity
IPCC	Coal	CO	Global	820	kg/kWh	Median
IPCC	Natural Gas	NG	Global	490	kg/kWh	Median
IPCC	Biomass and waste	BWB	Global	230	kg/kWh	Median
IPCC	Geothermal	GE	Global	38	kg/kWh	Median
IPCC	Hydro	HY	Global	24	kg/kWh	Median
IPCC	Nuclear	NU	Global	12	kg/kWh	Median
IPCC	Solar	ST	Global	27	kg/kWh	Median
IPCC	Solar	PV	Global	48	kg/kWh	Median
IPCC	Wind	WI	Global	11	kg/kWh	Median
IPCC	Wind	WI	Global	12	kg/kWh	Median
IPCC	Tide and wave	WA	Global	17	kg/kWh	Median
NREL	Wind	WI	Global	13	kg/kWh	Median
NREL	Solar	PV	Global	43	kg/kWh	Median
NREL	Solar	ST	Global	28	kg/kWh	Median
NREL	Nuclear	NU	Global	13	kg/kWh	Median
NREL	Coal	CO	Global	980	kg/kWh	Median
NREL	Natural Gas	NG	Global	486	kg/kWh	Median
NREL	Wind	WI	Global	8	kg/kWh	Q1
NREL	Solar	PV	Global	35	kg/kWh	Q1
NREL	Solar	ST	Global	14	kg/kWh	Q1
NREL	Nuclear	NU	Global	10	kg/kWh	Q1
NREL	Coal	CO	Global	930	kg/kWh	Q1
NREL	Natural Gas	NG	Global	427	kg/kWh	Q1
NREL	Wind	WI	Global	20	kg/kWh	Q3
NREL	Solar	PV	Global	50	kg/kWh	Q3
NREL	Solar	ST	Global	32	kg/kWh	Q3
NREL	Nuclear	NU	Global	39	kg/kWh	Q3
NREL	Natural Gas	NG	Global	558	kg/kWh	Q3
NREL	Coal	CO	Global	1050	kg/kWh	Q3
Electricity Maps	Natural Gas	NG	US	526.034	g/kWh	eGrid 2020; IPCC 2014
Electricity Maps	Oil	OI	US	1047.9	g/kWh	eGrid 2020; IPCC 2014
Electricity Maps	Coal	CO	US	1049.62	g/kWh	eGrid 2020; IPCC 2014
Electricity Maps	Wind	WI	US	11	g/kWh	IPCC 2014
Electricity Maps	Hydro	HY	US	24	g/kWh	IPCC 2014
Electricity Maps	Solar	SO	US	26.221	g/kWh	INCER ACV
Electricity Maps	Biomass and waste	BWB	US	285.841	g/kWh	eGrid 2020
Electricity Maps	Nuclear	NU	US	12	g/kWh	IPCC 2014
Electricity Maps	Nec	NC	US	700	g/kWh	assumes thermal (coal, gas, oil or biomass)
Electricity Maps	Geothermal	GE	US	108.88	g/kWh	eGrid 2020; IPCC 2014
EXIO Hybrid	Biomass and waste	BW	US	23.3286	g/kWh	Activity
EXIO Hybrid	Coal	CO	US	1924.73	g/kWh	Activity
EXIO Hybrid	Geothermal	GE	US	13.5642	g/kWh	Activity
EXIO Hybrid	Hydro	HY	US	1.37772	g/kWh	Activity
EXIO Hybrid	Natural Gas	NG	US	730.508	g/kWh	Activity
EXIO Hybrid	Nuclear	NU	US	3.73533	g/kWh	Activity
EXIO Hybrid	Oil	OI	US	2420.48	g/kWh	Activity
EXIO Hybrid	Solar	PV	US	29.849	g/kWh	Activity
EXIO Hybrid	Solar	ST	US	75.5192	g/kWh	Activity
EXIO Hybrid	Wind	WI	US	2.58466	g/kWh	Activity
Ecoinvent	Coal	CO	Unknown	1113.83	g/kWh	De-regionalized (Steubing et al 2022)
Ecoinvent	Coal	CO	Unknown	1241.13	g/kWh	De-regionalized (Steubing et al 2022)
Ecoinvent	Coal	CO	Unknown	1245.95	g/kWh	De-regionalized (Steubing et al 2022)
Ecoinvent	Coal	CO	Unknown	985.674	g/kWh	De-regionalized (Steubing et al 2022)
Ecoinvent	Coal	CO	Unknown	1218.29	g/kWh	De-regionalized (Steubing et al 2022)
Ecoinvent	Coal	CO	Unknown	1116.79	g/kWh	De-regionalized (Steubing et al 2022)
Ecoinvent	Coal	CO	Unknown	926.377	g/kWh	De-regionalized (Steubing et al 2022)
Ecoinvent	Coal	CO	Unknown	1438.03	g/kWh	De-regionalized (Steubing et al 2022)
Ecoinvent	Coal	CO	Unknown	2038.08	g/kWh	De-regionalized (Steubing et al 2022)
Ecoinvent	Coal	CO	Unknown	1138.2	g/kWh	De-regionalized (Steubing et al 2022)
Ecoinvent	Coal	CO	Unknown	1258.51	g/kWh	De-regionalized (Steubing et al 2022)
Ecoinvent	Coal	CO	Unknown	1236.16	g/kWh	De-regionalized (Steubing et al 2022)
Ecoinvent	Coal	CO	Unknown	1288.82	g/kWh	De-regionalized (Steubing et al 2022)
Ecoinvent	Coal	CO	Unknown	1088.51	g/kWh	De-regionalized (Steubing et al 2022)
Ecoinvent	Coal	CO	Unknown	1088.51	g/kWh	De-regionalized (Steubing et al 2022)
Ecoinvent	Coal	CO	Unknown	1288.82	g/kWh	De-regionalized (Steubing et al 2022)
Ecoinvent	Coal	CO	Unknown	1288.82	g/kWh	De-regionalized (Steubing et al 2022)
Ecoinvent	Coal	CO	Unknown	1095.98	g/kWh	De-regionalized (Steubing et al 2022)
Ecoinvent	Coal	CO	Unknown	1288.82	g/kWh	De-regionalized (Steubing et al 2022)
Ecoinvent	Coal	CO	Unknown	1088.51	g/kWh	De-regionalized (Steubing et al 2022)
Ecoinvent	Coal	CO	Unknown	1288.29	g/kWh	De-regionalized (Steubing et al 2022)
Ecoinvent	Coal	CO	Unknown	1288.29	g/kWh	De-regionalized (Steubing et al 2022)
Ecoinvent	Coal	CO	Unknown	1088.51	g/kWh	De-regionalized (Steubing et al 2022)
Ecoinvent	Coal	CO	Unknown	1230.65	g/kWh	De-regionalized (Steubing et al 2022)
Ecoinvent	Coal	CO	Unknown	1145.09	g/kWh	De-regionalized (Steubing et al 2022)
Ecoinvent	Coal	CO	Unknown	1633.77	g/kWh	De-regionalized (Steubing et al 2022)
Ecoinvent	Coal	CO	Unknown	1294.55	g/kWh	De-regionalized (Steubing et al 2022)
Ecoinvent	Coal	CO	Unknown	1286.96	g/kWh	De-regionalized (Steubing et al 2022)
Ecoinvent	Coal	CO	Unknown	1441.01	g/kWh	De-regionalized (Steubing et al 2022)
Ecoinvent	Coal	CO	Unknown	1455.45	g/kWh	De-regionalized (Steubing et al 2022)
Ecoinvent	Coal	CO	Unknown	1452.16	g/kWh	De-regionalized (Steubing et al 2022)
Ecoinvent	Coal	CO	Unknown	1395.97	g/kWh	De-regionalized (Steubing et al 2022)
Ecoinvent	Coal	CO	Unknown	1526.24	g/kWh	De-regionalized (Steubing et al 2022)
Ecoinvent	Coal	CO	Unknown	1497.09	g/kWh	De-regionalized (Steubing et al 2022)
Ecoinvent	Coal	CO	Unknown	1808.66	g/kWh	De-regionalized (Steubing et al 2022)
Ecoinvent	Coal	CO	Unknown	1443.76	g/kWh	De-regionalized (Steubing et al 2022)
Ecoinvent	Coal	CO	Unknown	1389.59	g/kWh	De-regionalized (Steubing et al 2022)
Ecoinvent	Coal	CO	Unknown	1926.11	g/kWh	De-regionalized (Steubing et al 2022)
Ecoinvent	Coal	CO	Unknown	1260.43	g/kWh	De-regionalized (Steubing et al 2022)
Ecoinvent	Coal	CO	Unknown	1387.78	g/kWh	De-regionalized (Steubing et al 2022)
Ecoinvent	Coal	CO	Unknown	1641.52	g/kWh	De-regionalized (Steubing et al 2022)
Ecoinvent	Coal	CO	Unknown	2044.07	g/kWh	De-regionalized (Steubing et al 2022)
Ecoinvent	Coal	CO	Unknown	1594.07	g/kWh	De-regionalized (Steubing et al 2022)
Ecoinvent	Coal	CO	Unknown	1576.49	g/kWh	De-regionalized (Steubing et al 2022)
Ecoinvent	Coal	CO	Unknown	1372.43	g/kWh	De-regionalized (Steubing et al 2022)
Ecoinvent	Coal	CO	Unknown	1529.52	g/kWh	De-regionalized (Steubing et al 2022)
Ecoinvent	Coal	CO	Unknown	1436.72	g/kWh	De-regionalized (Steubing et al 2022)
Ecoinvent	Coal	CO	Unknown	1197	g/kWh	De-regionalized (Steubing et al 2022)
Ecoinvent	Coal	CO	Unknown	1570.02	g/kWh	De-regionalized (Steubing et al 2022)
Ecoinvent	Coal	CO	Unknown	1401.82	g/kWh	De-regionalized (Steubing et al 2022)
Ecoinvent	Coal	CO	Unknown	1496.99	g/kWh	De-regionalized (Steubing et al 2022)
Ecoinvent	Coal	CO	Unknown	1480.11	g/kWh	De-regionalized (Steubing et al 2022)
Ecoinvent	Coal	CO	Unknown	2068.08	g/kWh	De-regionalized (Steubing et al 2022)
Ecoinvent	Coal	CO	Unknown	1198.94	g/kWh	De-regionalized (Steubing et al 2022)
Ecoinvent	Coal	CO	Unknown	1275.94	g/kWh	De-regionalized (Steubing et al 2022)
Ecoinvent	Coal	CO	Unknown	1178.78	g/kWh	De-regionalized (Steubing et al 2022)
Ecoinvent	Coal	CO	Unknown	1765.52	g/kWh	De-regionalized (Steubing et al 2022)
Ecoinvent	Coal	CO	Unknown	1689.97	g/kWh	De-regionalized (Steubing et al 2022)
Ecoinvent	Coal	CO	Unknown	1054.46	g/kWh	De-regionalized (Steubing et al 2022)
Ecoinvent	Coal	CO	Unknown	1205.26	g/kWh	De-regionalized (Steubing et al 2022)
Ecoinvent	Coal	CO	Unknown	1095.17	g/kWh	De-regionalized (Steubing et al 2022)
Ecoinvent	Coal	CO	Unknown	1100.53	g/kWh	De-regionalized (Steubing et al 2022)
Ecoinvent	Coal	CO	Unknown	1094.89	g/kWh	De-regionalized (Steubing et al 2022)
Ecoinvent	Coal	CO	Unknown	1082.24	g/kWh	De-regionalized (Steubing et al 2022)
Ecoinvent	Coal	CO	Unknown	1224.64	g/kWh	De-regionalized (Steubing et al 2022)
Ecoinvent	Coal	CO	Unknown	1166.94	g/kWh	De-regionalized (Steubing et al 2022)
Ecoinvent	Coal	CO	Unknown	1159.39	g/kWh	De-regionalized (Steubing et al 2022)
Ecoinvent	Coal	CO	Unknown	1301.63	g/kWh	De-regionalized (Steubing et al 2022)
Ecoinvent	Coal	CO	Unknown	1558.48	g/kWh	De-regionalized (Steubing et al 2022)
Ecoinvent	Coal	CO	Unknown	1406.73	g/kWh	De-regionalized (Steubing et al 2022)
Ecoinvent	Coal	CO	Unknown	1236.16	g/kWh	De-regionalized (Steubing et al 2022)
Ecoinvent	Coal	CO	Unknown	1195.24	g/kWh	De-regionalized (Steubing et al 2022)
Ecoinvent	Coal	CO	Unknown	1269.03	g/kWh	De-regionalized (Steubing et al 2022)
Ecoinvent	Coal	CO	Unknown	1732.9	g/kWh	De-regionalized (Steubing et al 2022)
Ecoinvent	Coal	CO	Unknown	2261.9	g/kWh	De-regionalized (Steubing et al 2022)
Ecoinvent	Coal	CO	Unknown	1732.9	g/kWh	De-regionalized (Steubing et al 2022)
Ecoinvent	Coal	CO	Unknown	1853.13	g/kWh	De-regionalized (Steubing et al 2022)
Ecoinvent	Coal	CO	Unknown	1564.59	g/kWh	De-regionalized (Steubing et al 2022)
Ecoinvent	Coal	CO	Unknown	1390.66	g/kWh	De-regionalized (Steubing et al 2022)
Ecoinvent	Coal	CO	Unknown	1684.81	g/kWh	De-regionalized (Steubing et al 2022)
Ecoinvent	Coal	CO	Unknown	1805.04	g/kWh	De-regionalized (Steubing et al 2022)
Ecoinvent	Coal	CO	Unknown	1660.77	g/kWh	De-regionalized (Steubing et al 2022)
Ecoinvent	Coal	CO	Unknown	1756.95	g/kWh	De-regionalized (Steubing et al 2022)
Ecoinvent	Coal	CO	Unknown	1901.22	g/kWh	De-regionalized (Steubing et al 2022)
Ecoinvent	Coal	CO	Unknown	1756.95	g/kWh	De-regionalized (Steubing et al 2022)
Ecoinvent	Coal	CO	Unknown	1588.63	g/kWh	De-regionalized (Steubing et al 2022)
Ecoinvent	Coal	CO	Unknown	1612.68	g/kWh	De-regionalized (Steubing et al 2022)
Ecoinvent	Coal	CO	Unknown	1391.46	g/kWh	De-regionalized (Steubing et al 2022)
Ecoinvent	Coal	CO	Unknown	1732.9	g/kWh	De-regionalized (Steubing et al 2022)
Ecoinvent	Coal	CO	Unknown	1391.46	g/kWh	De-regionalized (Steubing et al 2022)
Ecoinvent	Coal	CO	Unknown	1925.26	g/kWh	De-regionalized (Steubing et al 2022)
Ecoinvent	Coal	CO	Unknown	1660.77	g/kWh	De-regionalized (Steubing et al 2022)
Ecoinvent	Coal	CO	Unknown	1412.75	g/kWh	De-regionalized (Steubing et al 2022)
Ecoinvent	Coal	CO	Unknown	1102.19	g/kWh	De-regionalized (Steubing et al 2022)
Ecoinvent	Coal	CO	Unknown	1148.91	g/kWh	De-regionalized (Steubing et al 2022)
Ecoinvent	Coal	CO	Unknown	1149.44	g/kWh	De-regionalized (Steubing et al 2022)
Ecoinvent	Coal	CO	Unknown	1258.51	g/kWh	De-regionalized (Steubing et al 2022)
Ecoinvent	Coal	CO	Unknown	1067.29	g/kWh	De-regionalized (Steubing et al 2022)
Ecoinvent	Coal	CO	Unknown	989.516	g/kWh	De-regionalized (Steubing et al 2022)
Ecoinvent	Coal	CO	Unknown	1189.02	g/kWh	De-regionalized (Steubing et al 2022)
Ecoinvent	Coal	CO	Unknown	1026.96	g/kWh	De-regionalized (Steubing et al 2022)
Ecoinvent	Coal	CO	Unknown	998.024	g/kWh	De-regionalized (Steubing et al 2022)
Ecoinvent	Coal	CO	Unknown	1489.91	g/kWh	De-regionalized (Steubing et al 2022)
Ecoinvent	Coal	CO	Unknown	1168.01	g/kWh	De-regionalized (Steubing et al 2022)
Ecoinvent	Coal	CO	Unknown	1154.99	g/kWh	De-regionalized (Steubing et al 2022)
Ecoinvent	Coal	CO	Unknown	1136.58	g/kWh	De-regionalized (Steubing et al 2022)
Ecoinvent	Coal	CO	Unknown	1138.2	g/kWh	De-regionalized (Steubing et al 2022)
Ecoinvent	Coal	CO	Unknown	1236.16	g/kWh	De-regionalized (Steubing et al 2022)
Ecoinvent	Coal	CO	Unknown	973.373	g/kWh	De-regionalized (Steubing et al 2022)
Ecoinvent	Coal	CO	Unknown	1037.29	g/kWh	De-regionalized (Steubing et al 2022)
Ecoinvent	Coal	CO	Unknown	1842.58	g/kWh	De-regionalized (Steubing et al 2022)
Ecoinvent	Coal	CO	Unknown	1715.73	g/kWh	De-regionalized (Steubing et al 2022)
Ecoinvent	Coal	CO	Unknown	1492.22	g/kWh	De-regionalized (Steubing et al 2022)
Ecoinvent	Coal	CO	Unknown	1544.3	g/kWh	De-regionalized (Steubing et al 2022)
Ecoinvent	Coal	CO	Unknown	1196.12	g/kWh	De-regionalized (Steubing et al 2022)
Ecoinvent	Coal	CO	Unknown	1245.86	g/kWh	De-regionalized (Steubing et al 2022)
Ecoinvent	Coal	CO	Unknown	1177.17	g/kWh	De-regionalized (Steubing et al 2022)
Ecoinvent	Coal	CO	Unknown	1136.01	g/kWh	De-regionalized (Steubing et al 2022)
Ecoinvent	Coal	CO	Unknown	1151.91	g/kWh	De-regionalized (Steubing et al 2022)
Ecoinvent	Coal	CO	Unknown	1589.42	g/kWh	De-regionalized (Steubing et al 2022)
Ecoinvent	Coal	CO	Unknown	1223.62	g/kWh	De-regionalized (Steubing et al 2022)
Ecoinvent	Coal	CO	Unknown	1067.29	g/kWh	De-regionalized (Steubing et al 2022)
Ecoinvent	Coal	CO	Unknown	1367.57	g/kWh	De-regionalized (Steubing et al 2022)
Ecoinvent	Coal	CO	Unknown	1125.22	g/kWh	De-regionalized (Steubing et al 2022)
Ecoinvent	Coal	CO	Unknown	1277.99	g/kWh	De-regionalized (Steubing et al 2022)
Ecoinvent	Coal	CO	Unknown	1258.51	g/kWh	De-regionalized (Steubing et al 2022)
Ecoinvent	Coal	CO	Unknown	1245.95	g/kWh	De-regionalized (Steubing et al 2022)
Ecoinvent	Coal	CO	Unknown	1140.5	g/kWh	De-regionalized (Steubing et al 2022)
Ecoinvent	Coal	CO	Unknown	1745.49	g/kWh	De-regionalized (Steubing et al 2022)
Ecoinvent	Coal	CO	Unknown	1804.29	g/kWh	De-regionalized (Steubing et al 2022)
Ecoinvent	Coal	CO	Unknown	1151.59	g/kWh	De-regionalized (Steubing et al 2022)
Ecoinvent	Coal	CO	Unknown	1232.37	g/kWh	De-regionalized (Steubing et al 2022)
Ecoinvent	Coal	CO	Unknown	1151.9	g/kWh	De-regionalized (Steubing et al 2022)
Ecoinvent	Coal	CO	Unknown	1213.93	g/kWh	De-regionalized (Steubing et al 2022)
Ecoinvent	Coal	CO	Unknown	1214.61	g/kWh	De-regionalized (Steubing et al 2022)
Ecoinvent	Coal	CO	Unknown	1255.26	g/kWh	De-regionalized (Steubing et al 2022)
Ecoinvent	Coal	CO	Unknown	1165.84	g/kWh	De-regionalized (Steubing et al 2022)
Ecoinvent	Coal	CO	Unknown	1247.53	g/kWh	De-regionalized (Steubing et al 2022)
Ecoinvent	Coal	CO	Unknown	1145.38	g/kWh	De-regionalized (Steubing et al 2022)
Ecoinvent	Coal	CO	Unknown	1221.24	g/kWh	De-regionalized (Steubing et al 2022)
Ecoinvent	Coal	CO	Unknown	1223.1	g/kWh	De-regionalized (Steubing et al 2022)
Ecoinvent	Coal	CO	Unknown	1291.25	g/kWh	De-regionalized (Steubing et al 2022)
Ecoinvent	Coal	CO	Unknown	1221.55	g/kWh	De-regionalized (Steubing et al 2022)
Ecoinvent	Coal	CO	Unknown	1287.15	g/kWh	De-regionalized (Steubing et al 2022)
Ecoinvent	Coal	CO	Unknown	1194.03	g/kWh	De-regionalized (Steubing et al 2022)
Ecoinvent	Coal	CO	Unknown	1239.9	g/kWh	De-regionalized (Steubing et al 2022)
Ecoinvent	Coal	CO	Unknown	1002.28	g/kWh	De-regionalized (Steubing et al 2022)
Ecoinvent	Coal	CO	Unknown	1239.9	g/kWh	De-regionalized (Steubing et al 2022)
Ecoinvent	Coal	CO	Unknown	1222.07	g/kWh	De-regionalized (Steubing et al 2022)
Ecoinvent	Coal	CO	Unknown	1421.2	g/kWh	De-regionalized (Steubing et al 2022)
Ecoinvent	Coal	CO	Unknown	1360.4	g/kWh	De-regionalized (Steubing et al 2022)
Ecoinvent	Coal	CO	Unknown	1051.55	g/kWh	De-regionalized (Steubing et al 2022)
Ecoinvent	Coal	CO	Unknown	1351.79	g/kWh	De-regionalized (Steubing et al 2022)
Ecoinvent	Coal	CO	Unknown	1311.07	g/kWh	De-regionalized (Steubing et al 2022)
Ecoinvent	Coal	CO	Unknown	1236.16	g/kWh	De-regionalized (Steubing et al 2022)
Ecoinvent	Coal	CO	Unknown	1447.37	g/kWh	De-regionalized (Steubing et al 2022)
Ecoinvent	Coal	CO	Unknown	1343.96	g/kWh	De-regionalized (Steubing et al 2022)
Ecoinvent	Coal	CO	Unknown	1236.16	g/kWh	De-regionalized (Steubing et al 2022)
Ecoinvent	Coal	CO	Unknown	1500.62	g/kWh	De-regionalized (Steubing et al 2022)
Ecoinvent	Coal	CO	Unknown	1584.31	g/kWh	De-regionalized (Steubing et al 2022)
Ecoinvent	Coal	CO	Unknown	1258.51	g/kWh	De-regionalized (Steubing et al 2022)
Ecoinvent	Natural Gas	NG	Unknown	418.661	g/kWh	De-regionalized (Steubing et al 2022)
Ecoinvent	Natural Gas	NG	Unknown	695.731	g/kWh	De-regionalized (Steubing et al 2022)
Ecoinvent	Natural Gas	NG	Unknown	541.975	g/kWh	De-regionalized (Steubing et al 2022)
Ecoinvent	Natural Gas	NG	Unknown	512.432	g/kWh	De-regionalized (Steubing et al 2022)
Ecoinvent	Natural Gas	NG	Unknown	506.861	g/kWh	De-regionalized (Steubing et al 2022)
Ecoinvent	Natural Gas	NG	Unknown	840.959	g/kWh	De-regionalized (Steubing et al 2022)
Ecoinvent	Natural Gas	NG	Unknown	533.798	g/kWh	De-regionalized (Steubing et al 2022)
Ecoinvent	Natural Gas	NG	Unknown	765.35	g/kWh	De-regionalized (Steubing et al 2022)
Ecoinvent	Natural Gas	NG	Unknown	413.241	g/kWh	De-regionalized (Steubing et al 2022)
Ecoinvent	Natural Gas	NG	Unknown	724.275	g/kWh	De-regionalized (Steubing et al 2022)
Ecoinvent	Natural Gas	NG	Unknown	423.091	g/kWh	De-regionalized (Steubing et al 2022)
Ecoinvent	Natural Gas	NG	Unknown	558.776	g/kWh	De-regionalized (Steubing et al 2022)
Ecoinvent	Natural Gas	NG	Unknown	387.133	g/kWh	De-regionalized (Steubing et al 2022)
Ecoinvent	Natural Gas	NG	Unknown	562.607	g/kWh	De-regionalized (Steubing et al 2022)
Ecoinvent	Natural Gas	NG	Unknown	457.733	g/kWh	De-regionalized (Steubing et al 2022)
Ecoinvent	Natural Gas	NG	Unknown	614.824	g/kWh	De-regionalized (Steubing et al 2022)
Ecoinvent	Natural Gas	NG	Unknown	386.994	g/kWh	De-regionalized (Steubing et al 2022)
Ecoinvent	Natural Gas	NG	Unknown	745.44	g/kWh	De-regionalized (Steubing et al 2022)
Ecoinvent	Natural Gas	NG	Unknown	602.493	g/kWh	De-regionalized (Steubing et al 2022)
Ecoinvent	Natural Gas	NG	Unknown	969.291	g/kWh	De-regionalized (Steubing et al 2022)
Ecoinvent	Natural Gas	NG	Unknown	432.243	g/kWh	De-regionalized (Steubing et al 2022)
Ecoinvent	Natural Gas	NG	Unknown	719.019	g/kWh	De-regionalized (Steubing et al 2022)
Ecoinvent	Natural Gas	NG	Unknown	557.127	g/kWh	De-regionalized (Steubing et al 2022)
Ecoinvent	Natural Gas	NG	Unknown	209.319	g/kWh	De-regionalized (Steubing et al 2022)
Ecoinvent	Natural Gas	NG	Unknown	438.105	g/kWh	De-regionalized (Steubing et al 2022)
Ecoinvent	Natural Gas	NG	Unknown	728.73	g/kWh	De-regionalized (Steubing et al 2022)
Ecoinvent	Natural Gas	NG	Unknown	564.651	g/kWh	De-regionalized (Steubing et al 2022)
Ecoinvent	Natural Gas	NG	Unknown	438.105	g/kWh	De-regionalized (Steubing et al 2022)
Ecoinvent	Natural Gas	NG	Unknown	728.73	g/kWh	De-regionalized (Steubing et al 2022)
Ecoinvent	Natural Gas	NG	Unknown	578.964	g/kWh	De-regionalized (Steubing et al 2022)
Ecoinvent	Natural Gas	NG	Unknown	438.105	g/kWh	De-regionalized (Steubing et al 2022)
Ecoinvent	Natural Gas	NG	Unknown	728.73	g/kWh	De-regionalized (Steubing et al 2022)
Ecoinvent	Natural Gas	NG	Unknown	564.651	g/kWh	De-regionalized (Steubing et al 2022)
Ecoinvent	Natural Gas	NG	Unknown	728.73	g/kWh	De-regionalized (Steubing et al 2022)
Ecoinvent	Natural Gas	NG	Unknown	438.105	g/kWh	De-regionalized (Steubing et al 2022)
Ecoinvent	Natural Gas	NG	Unknown	728.73	g/kWh	De-regionalized (Steubing et al 2022)
Ecoinvent	Natural Gas	NG	Unknown	578.964	g/kWh	De-regionalized (Steubing et al 2022)
Ecoinvent	Natural Gas	NG	Unknown	438.105	g/kWh	De-regionalized (Steubing et al 2022)
Ecoinvent	Natural Gas	NG	Unknown	728.73	g/kWh	De-regionalized (Steubing et al 2022)
Ecoinvent	Natural Gas	NG	Unknown	564.651	g/kWh	De-regionalized (Steubing et al 2022)
Ecoinvent	Natural Gas	NG	Unknown	438.105	g/kWh	De-regionalized (Steubing et al 2022)
Ecoinvent	Natural Gas	NG	Unknown	728.73	g/kWh	De-regionalized (Steubing et al 2022)
Ecoinvent	Natural Gas	NG	Unknown	564.651	g/kWh	De-regionalized (Steubing et al 2022)
Ecoinvent	Natural Gas	NG	Unknown	599.537	g/kWh	De-regionalized (Steubing et al 2022)
Ecoinvent	Natural Gas	NG	Unknown	578.964	g/kWh	De-regionalized (Steubing et al 2022)
Ecoinvent	Natural Gas	NG	Unknown	707.266	g/kWh	De-regionalized (Steubing et al 2022)
Ecoinvent	Natural Gas	NG	Unknown	395.676	g/kWh	De-regionalized (Steubing et al 2022)
Ecoinvent	Natural Gas	NG	Unknown	438.105	g/kWh	De-regionalized (Steubing et al 2022)
Ecoinvent	Natural Gas	NG	Unknown	728.73	g/kWh	De-regionalized (Steubing et al 2022)
Ecoinvent	Natural Gas	NG	Unknown	564.651	g/kWh	De-regionalized (Steubing et al 2022)
Ecoinvent	Natural Gas	NG	Unknown	566.803	g/kWh	De-regionalized (Steubing et al 2022)
Ecoinvent	Natural Gas	NG	Unknown	569.072	g/kWh	De-regionalized (Steubing et al 2022)
Ecoinvent	Natural Gas	NG	Unknown	531.378	g/kWh	De-regionalized (Steubing et al 2022)
Ecoinvent	Natural Gas	NG	Unknown	533.505	g/kWh	De-regionalized (Steubing et al 2022)
Ecoinvent	Natural Gas	NG	Unknown	762.252	g/kWh	De-regionalized (Steubing et al 2022)
Ecoinvent	Natural Gas	NG	Unknown	765.304	g/kWh	De-regionalized (Steubing et al 2022)
Ecoinvent	Natural Gas	NG	Unknown	597.441	g/kWh	De-regionalized (Steubing et al 2022)
Ecoinvent	Natural Gas	NG	Unknown	599.833	g/kWh	De-regionalized (Steubing et al 2022)
Ecoinvent	Natural Gas	NG	Unknown	597.441	g/kWh	De-regionalized (Steubing et al 2022)
Ecoinvent	Natural Gas	NG	Unknown	599.833	g/kWh	De-regionalized (Steubing et al 2022)
Ecoinvent	Natural Gas	NG	Unknown	669.858	g/kWh	De-regionalized (Steubing et al 2022)
Ecoinvent	Natural Gas	NG	Unknown	672.54	g/kWh	De-regionalized (Steubing et al 2022)
Ecoinvent	Natural Gas	NG	Unknown	669.858	g/kWh	De-regionalized (Steubing et al 2022)
Ecoinvent	Natural Gas	NG	Unknown	672.54	g/kWh	De-regionalized (Steubing et al 2022)
Ecoinvent	Natural Gas	NG	Unknown	669.858	g/kWh	De-regionalized (Steubing et al 2022)
Ecoinvent	Natural Gas	NG	Unknown	672.54	g/kWh	De-regionalized (Steubing et al 2022)
Ecoinvent	Natural Gas	NG	Unknown	650.156	g/kWh	De-regionalized (Steubing et al 2022)
Ecoinvent	Natural Gas	NG	Unknown	652.759	g/kWh	De-regionalized (Steubing et al 2022)
Ecoinvent	Natural Gas	NG	Unknown	713.075	g/kWh	De-regionalized (Steubing et al 2022)
Ecoinvent	Natural Gas	NG	Unknown	715.93	g/kWh	De-regionalized (Steubing et al 2022)
Ecoinvent	Natural Gas	NG	Unknown	690.791	g/kWh	De-regionalized (Steubing et al 2022)
Ecoinvent	Natural Gas	NG	Unknown	693.557	g/kWh	De-regionalized (Steubing et al 2022)
Ecoinvent	Natural Gas	NG	Unknown	850.204	g/kWh	De-regionalized (Steubing et al 2022)
Ecoinvent	Natural Gas	NG	Unknown	853.609	g/kWh	De-regionalized (Steubing et al 2022)
Ecoinvent	Natural Gas	NG	Unknown	669.858	g/kWh	De-regionalized (Steubing et al 2022)
Ecoinvent	Natural Gas	NG	Unknown	672.54	g/kWh	De-regionalized (Steubing et al 2022)
Ecoinvent	Natural Gas	NG	Unknown	650.156	g/kWh	De-regionalized (Steubing et al 2022)
Ecoinvent	Natural Gas	NG	Unknown	652.759	g/kWh	De-regionalized (Steubing et al 2022)
Ecoinvent	Natural Gas	NG	Unknown	884.213	g/kWh	De-regionalized (Steubing et al 2022)
Ecoinvent	Natural Gas	NG	Unknown	887.753	g/kWh	De-regionalized (Steubing et al 2022)
Ecoinvent	Natural Gas	NG	Unknown	581.719	g/kWh	De-regionalized (Steubing et al 2022)
Ecoinvent	Natural Gas	NG	Unknown	584.048	g/kWh	De-regionalized (Steubing et al 2022)
Ecoinvent	Natural Gas	NG	Unknown	650.156	g/kWh	De-regionalized (Steubing et al 2022)
Ecoinvent	Natural Gas	NG	Unknown	652.759	g/kWh	De-regionalized (Steubing et al 2022)
Ecoinvent	Natural Gas	NG	Unknown	762.252	g/kWh	De-regionalized (Steubing et al 2022)
Ecoinvent	Natural Gas	NG	Unknown	765.304	g/kWh	De-regionalized (Steubing et al 2022)
Ecoinvent	Natural Gas	NG	Unknown	961.101	g/kWh	De-regionalized (Steubing et al 2022)
Ecoinvent	Natural Gas	NG	Unknown	964.949	g/kWh	De-regionalized (Steubing et al 2022)
Ecoinvent	Natural Gas	NG	Unknown	736.844	g/kWh	De-regionalized (Steubing et al 2022)
Ecoinvent	Natural Gas	NG	Unknown	739.794	g/kWh	De-regionalized (Steubing et al 2022)
Ecoinvent	Natural Gas	NG	Unknown	736.844	g/kWh	De-regionalized (Steubing et al 2022)
Ecoinvent	Natural Gas	NG	Unknown	739.794	g/kWh	De-regionalized (Steubing et al 2022)
Ecoinvent	Natural Gas	NG	Unknown	631.58	g/kWh	De-regionalized (Steubing et al 2022)
Ecoinvent	Natural Gas	NG	Unknown	634.109	g/kWh	De-regionalized (Steubing et al 2022)
Ecoinvent	Natural Gas	NG	Unknown	713.075	g/kWh	De-regionalized (Steubing et al 2022)
Ecoinvent	Natural Gas	NG	Unknown	715.93	g/kWh	De-regionalized (Steubing et al 2022)
Ecoinvent	Natural Gas	NG	Unknown	669.858	g/kWh	De-regionalized (Steubing et al 2022)
Ecoinvent	Natural Gas	NG	Unknown	672.54	g/kWh	De-regionalized (Steubing et al 2022)
Ecoinvent	Natural Gas	NG	Unknown	552.633	g/kWh	De-regionalized (Steubing et al 2022)
Ecoinvent	Natural Gas	NG	Unknown	554.846	g/kWh	De-regionalized (Steubing et al 2022)
Ecoinvent	Natural Gas	NG	Unknown	736.844	g/kWh	De-regionalized (Steubing et al 2022)
Ecoinvent	Natural Gas	NG	Unknown	739.794	g/kWh	De-regionalized (Steubing et al 2022)
Ecoinvent	Natural Gas	NG	Unknown	650.156	g/kWh	De-regionalized (Steubing et al 2022)
Ecoinvent	Natural Gas	NG	Unknown	652.759	g/kWh	De-regionalized (Steubing et al 2022)
Ecoinvent	Natural Gas	NG	Unknown	690.791	g/kWh	De-regionalized (Steubing et al 2022)
Ecoinvent	Natural Gas	NG	Unknown	693.557	g/kWh	De-regionalized (Steubing et al 2022)
Ecoinvent	Natural Gas	NG	Unknown	678.077	g/kWh	De-regionalized (Steubing et al 2022)
Ecoinvent	Natural Gas	NG	Unknown	680.792	g/kWh	De-regionalized (Steubing et al 2022)
Ecoinvent	Natural Gas	NG	Unknown	961.101	g/kWh	De-regionalized (Steubing et al 2022)
Ecoinvent	Natural Gas	NG	Unknown	964.949	g/kWh	De-regionalized (Steubing et al 2022)
Ecoinvent	Natural Gas	NG	Unknown	552.633	g/kWh	De-regionalized (Steubing et al 2022)
Ecoinvent	Natural Gas	NG	Unknown	554.846	g/kWh	De-regionalized (Steubing et al 2022)
Ecoinvent	Natural Gas	NG	Unknown	476.997	g/kWh	De-regionalized (Steubing et al 2022)
Ecoinvent	Natural Gas	NG	Unknown	749.002	g/kWh	De-regionalized (Steubing et al 2022)
Ecoinvent	Natural Gas	NG	Unknown	886.759	g/kWh	De-regionalized (Steubing et al 2022)
Ecoinvent	Natural Gas	NG	Unknown	449.048	g/kWh	De-regionalized (Steubing et al 2022)
Ecoinvent	Natural Gas	NG	Unknown	512.985	g/kWh	De-regionalized (Steubing et al 2022)
Ecoinvent	Natural Gas	NG	Unknown	567.189	g/kWh	De-regionalized (Steubing et al 2022)
Ecoinvent	Natural Gas	NG	Unknown	835.1	g/kWh	De-regionalized (Steubing et al 2022)
Ecoinvent	Natural Gas	NG	Unknown	884.109	g/kWh	De-regionalized (Steubing et al 2022)
Ecoinvent	Natural Gas	NG	Unknown	431.545	g/kWh	De-regionalized (Steubing et al 2022)
Ecoinvent	Natural Gas	NG	Unknown	569.757	g/kWh	De-regionalized (Steubing et al 2022)
Ecoinvent	Natural Gas	NG	Unknown	550.091	g/kWh	De-regionalized (Steubing et al 2022)
Ecoinvent	Natural Gas	NG	Unknown	786.909	g/kWh	De-regionalized (Steubing et al 2022)
Ecoinvent	Natural Gas	NG	Unknown	703.587	g/kWh	De-regionalized (Steubing et al 2022)
Ecoinvent	Natural Gas	NG	Unknown	753.35	g/kWh	De-regionalized (Steubing et al 2022)
Ecoinvent	Natural Gas	NG	Unknown	424.181	g/kWh	De-regionalized (Steubing et al 2022)
Ecoinvent	Natural Gas	NG	Unknown	710.098	g/kWh	De-regionalized (Steubing et al 2022)
Ecoinvent	Natural Gas	NG	Unknown	416.648	g/kWh	De-regionalized (Steubing et al 2022)
Ecoinvent	Natural Gas	NG	Unknown	550.249	g/kWh	De-regionalized (Steubing et al 2022)
Ecoinvent	Natural Gas	NG	Unknown	753.35	g/kWh	De-regionalized (Steubing et al 2022)
Ecoinvent	Natural Gas	NG	Unknown	602.213	g/kWh	De-regionalized (Steubing et al 2022)
Ecoinvent	Natural Gas	NG	Unknown	942.825	g/kWh	De-regionalized (Steubing et al 2022)
Ecoinvent	Natural Gas	NG	Unknown	518.989	g/kWh	De-regionalized (Steubing et al 2022)
Ecoinvent	Natural Gas	NG	Unknown	624.15	g/kWh	De-regionalized (Steubing et al 2022)
Ecoinvent	Natural Gas	NG	Unknown	595.887	g/kWh	De-regionalized (Steubing et al 2022)
Ecoinvent	Natural Gas	NG	Unknown	990.849	g/kWh	De-regionalized (Steubing et al 2022)
Ecoinvent	Natural Gas	NG	Unknown	635.293	g/kWh	De-regionalized (Steubing et al 2022)
Ecoinvent	Natural Gas	NG	Unknown	667.364	g/kWh	De-regionalized (Steubing et al 2022)
Ecoinvent	Natural Gas	NG	Unknown	719.397	g/kWh	De-regionalized (Steubing et al 2022)
Ecoinvent	Natural Gas	NG	Unknown	836.985	g/kWh	De-regionalized (Steubing et al 2022)
Ecoinvent	Natural Gas	NG	Unknown	539.193	g/kWh	De-regionalized (Steubing et al 2022)
Ecoinvent	Natural Gas	NG	Unknown	689.431	g/kWh	De-regionalized (Steubing et al 2022)
Ecoinvent	Natural Gas	NG	Unknown	509.705	g/kWh	De-regionalized (Steubing et al 2022)
Ecoinvent	Natural Gas	NG	Unknown	511.681	g/kWh	De-regionalized (Steubing et al 2022)
Ecoinvent	Natural Gas	NG	Unknown	789.31	g/kWh	De-regionalized (Steubing et al 2022)
Ecoinvent	Natural Gas	NG	Unknown	792.37	g/kWh	De-regionalized (Steubing et al 2022)
Ecoinvent	Natural Gas	NG	Unknown	536.229	g/kWh	De-regionalized (Steubing et al 2022)
Ecoinvent	Natural Gas	NG	Unknown	541.525	g/kWh	De-regionalized (Steubing et al 2022)
Ecoinvent	Natural Gas	NG	Unknown	509.064	g/kWh	De-regionalized (Steubing et al 2022)
Ecoinvent	Natural Gas	NG	Unknown	511.038	g/kWh	De-regionalized (Steubing et al 2022)
Ecoinvent	Natural Gas	NG	Unknown	491.019	g/kWh	De-regionalized (Steubing et al 2022)
Ecoinvent	Natural Gas	NG	Unknown	492.923	g/kWh	De-regionalized (Steubing et al 2022)
Ecoinvent	Natural Gas	NG	Unknown	498.138	g/kWh	De-regionalized (Steubing et al 2022)
Ecoinvent	Natural Gas	NG	Unknown	517.98	g/kWh	De-regionalized (Steubing et al 2022)
Ecoinvent	Natural Gas	NG	Unknown	691.297	g/kWh	De-regionalized (Steubing et al 2022)
Ecoinvent	Natural Gas	NG	Unknown	693.978	g/kWh	De-regionalized (Steubing et al 2022)
Ecoinvent	Natural Gas	NG	Unknown	535.88	g/kWh	De-regionalized (Steubing et al 2022)
Ecoinvent	Natural Gas	NG	Unknown	537.957	g/kWh	De-regionalized (Steubing et al 2022)
Ecoinvent	Natural Gas	NG	Unknown	735.856	g/kWh	De-regionalized (Steubing et al 2022)
Ecoinvent	Natural Gas	NG	Unknown	738.709	g/kWh	De-regionalized (Steubing et al 2022)
Ecoinvent	Natural Gas	NG	Unknown	543.001	g/kWh	De-regionalized (Steubing et al 2022)
Ecoinvent	Natural Gas	NG	Unknown	545.107	g/kWh	De-regionalized (Steubing et al 2022)
Ecoinvent	Natural Gas	NG	Unknown	541.548	g/kWh	De-regionalized (Steubing et al 2022)
Ecoinvent	Natural Gas	NG	Unknown	543.648	g/kWh	De-regionalized (Steubing et al 2022)
Ecoinvent	Natural Gas	NG	Unknown	939.135	g/kWh	De-regionalized (Steubing et al 2022)
Ecoinvent	Natural Gas	NG	Unknown	942.777	g/kWh	De-regionalized (Steubing et al 2022)
Ecoinvent	Natural Gas	NG	Unknown	527.74	g/kWh	De-regionalized (Steubing et al 2022)
Ecoinvent	Natural Gas	NG	Unknown	529.787	g/kWh	De-regionalized (Steubing et al 2022)
Ecoinvent	Natural Gas	NG	Unknown	517.689	g/kWh	De-regionalized (Steubing et al 2022)
Ecoinvent	Natural Gas	NG	Unknown	877.226	g/kWh	De-regionalized (Steubing et al 2022)
Ecoinvent	Natural Gas	NG	Unknown	377.897	g/kWh	De-regionalized (Steubing et al 2022)
Ecoinvent	Natural Gas	NG	Unknown	639.458	g/kWh	De-regionalized (Steubing et al 2022)
Ecoinvent	Natural Gas	NG	Unknown	465.458	g/kWh	De-regionalized (Steubing et al 2022)
Ecoinvent	Natural Gas	NG	Unknown	464.569	g/kWh	De-regionalized (Steubing et al 2022)
Ecoinvent	Natural Gas	NG	Unknown	782.859	g/kWh	De-regionalized (Steubing et al 2022)
Ecoinvent	Natural Gas	NG	Unknown	506.089	g/kWh	De-regionalized (Steubing et al 2022)
Ecoinvent	Natural Gas	NG	Unknown	695.458	g/kWh	De-regionalized (Steubing et al 2022)
Ecoinvent	Natural Gas	NG	Unknown	480.324	g/kWh	De-regionalized (Steubing et al 2022)
Ecoinvent	Natural Gas	NG	Unknown	758.688	g/kWh	De-regionalized (Steubing et al 2022)
Ecoinvent	Natural Gas	NG	Unknown	386.994	g/kWh	De-regionalized (Steubing et al 2022)
Ecoinvent	Natural Gas	NG	Unknown	520.459	g/kWh	De-regionalized (Steubing et al 2022)
Ecoinvent	Natural Gas	NG	Unknown	752.543	g/kWh	De-regionalized (Steubing et al 2022)
Ecoinvent	Natural Gas	NG	Unknown	489.885	g/kWh	De-regionalized (Steubing et al 2022)
Ecoinvent	Natural Gas	NG	Unknown	640.692	g/kWh	De-regionalized (Steubing et al 2022)
Ecoinvent	Natural Gas	NG	Unknown	386.994	g/kWh	De-regionalized (Steubing et al 2022)
Ecoinvent	Natural Gas	NG	Unknown	444.023	g/kWh	De-regionalized (Steubing et al 2022)
Ecoinvent	Natural Gas	NG	Unknown	703.336	g/kWh	De-regionalized (Steubing et al 2022)
Ecoinvent	Natural Gas	NG	Unknown	438.597	g/kWh	De-regionalized (Steubing et al 2022)
Ecoinvent	Natural Gas	NG	Unknown	684.994	g/kWh	De-regionalized (Steubing et al 2022)
Ecoinvent	Natural Gas	NG	Unknown	705.95	g/kWh	De-regionalized (Steubing et al 2022)
Ecoinvent	Natural Gas	NG	Unknown	374.224	g/kWh	De-regionalized (Steubing et al 2022)
Ecoinvent	Natural Gas	NG	Unknown	644.226	g/kWh	De-regionalized (Steubing et al 2022)
Ecoinvent	Natural Gas	NG	Unknown	394.029	g/kWh	De-regionalized (Steubing et al 2022)
Ecoinvent	Natural Gas	NG	Unknown	520.526	g/kWh	De-regionalized (Steubing et al 2022)
Ecoinvent	Natural Gas	NG	Unknown	705.95	g/kWh	De-regionalized (Steubing et al 2022)
Ecoinvent	Natural Gas	NG	Unknown	347.197	g/kWh	De-regionalized (Steubing et al 2022)
Ecoinvent	Natural Gas	NG	Unknown	483.047	g/kWh	De-regionalized (Steubing et al 2022)
Ecoinvent	Natural Gas	NG	Unknown	499.942	g/kWh	De-regionalized (Steubing et al 2022)
Ecoinvent	Natural Gas	NG	Unknown	559.624	g/kWh	De-regionalized (Steubing et al 2022)
Ecoinvent	Natural Gas	NG	Unknown	677.138	g/kWh	De-regionalized (Steubing et al 2022)
Ecoinvent	Natural Gas	NG	Unknown	386.994	g/kWh	De-regionalized (Steubing et al 2022)
Ecoinvent	Natural Gas	NG	Unknown	491.895	g/kWh	De-regionalized (Steubing et al 2022)
Ecoinvent	Natural Gas	NG	Unknown	692.983	g/kWh	De-regionalized (Steubing et al 2022)
Ecoinvent	Natural Gas	NG	Unknown	441.322	g/kWh	De-regionalized (Steubing et al 2022)
Ecoinvent	Natural Gas	NG	Unknown	722.85	g/kWh	De-regionalized (Steubing et al 2022)
Ecoinvent	Natural Gas	NG	Unknown	266.407	g/kWh	De-regionalized (Steubing et al 2022)
Ecoinvent	Natural Gas	NG	Unknown	613.658	g/kWh	De-regionalized (Steubing et al 2022)
Ecoinvent	Natural Gas	NG	Unknown	386.994	g/kWh	De-regionalized (Steubing et al 2022)
Ecoinvent	Natural Gas	NG	Unknown	614.795	g/kWh	De-regionalized (Steubing et al 2022)
Ecoinvent	Natural Gas	NG	Unknown	462.137	g/kWh	De-regionalized (Steubing et al 2022)
Ecoinvent	Natural Gas	NG	Unknown	703.548	g/kWh	De-regionalized (Steubing et al 2022)
Ecoinvent	Natural Gas	NG	Unknown	419.755	g/kWh	De-regionalized (Steubing et al 2022)
Ecoinvent	Natural Gas	NG	Unknown	1571.07	g/kWh	De-regionalized (Steubing et al 2022)
Ecoinvent	Natural Gas	NG	Unknown	552.787	g/kWh	De-regionalized (Steubing et al 2022)
Ecoinvent	Natural Gas	NG	Unknown	857.769	g/kWh	De-regionalized (Steubing et al 2022)
Ecoinvent	Natural Gas	NG	Unknown	784.685	g/kWh	De-regionalized (Steubing et al 2022)
Ecoinvent	Natural Gas	NG	Unknown	547.577	g/kWh	De-regionalized (Steubing et al 2022)
Ecoinvent	Natural Gas	NG	Unknown	887.462	g/kWh	De-regionalized (Steubing et al 2022)
Ecoinvent	Natural Gas	NG	Unknown	613.84	g/kWh	De-regionalized (Steubing et al 2022)
Ecoinvent	Natural Gas	NG	Unknown	815.224	g/kWh	De-regionalized (Steubing et al 2022)
Ecoinvent	Natural Gas	NG	Unknown	386.994	g/kWh	De-regionalized (Steubing et al 2022)
Ecoinvent	Natural Gas	NG	Unknown	1094.22	g/kWh	De-regionalized (Steubing et al 2022)
Ecoinvent	Natural Gas	NG	Unknown	566.527	g/kWh	De-regionalized (Steubing et al 2022)
Ecoinvent	Natural Gas	NG	Unknown	421.054	g/kWh	De-regionalized (Steubing et al 2022)
Ecoinvent	Natural Gas	NG	Unknown	693.557	g/kWh	De-regionalized (Steubing et al 2022)
Ecoinvent	Natural Gas	NG	Unknown	495.181	g/kWh	De-regionalized (Steubing et al 2022)
Ecoinvent	Natural Gas	NG	Unknown	549.721	g/kWh	De-regionalized (Steubing et al 2022)
Ecoinvent	Natural Gas	NG	Unknown	483.205	g/kWh	De-regionalized (Steubing et al 2022)
Ecoinvent	Natural Gas	NG	Unknown	776.519	g/kWh	De-regionalized (Steubing et al 2022)
Ecoinvent	Natural Gas	NG	Unknown	445.358	g/kWh	De-regionalized (Steubing et al 2022)
Ecoinvent	Natural Gas	NG	Unknown	535.873	g/kWh	De-regionalized (Steubing et al 2022)
Ecoinvent	Natural Gas	NG	Unknown	372.023	g/kWh	De-regionalized (Steubing et al 2022)
Ecoinvent	Natural Gas	NG	Unknown	613.686	g/kWh	De-regionalized (Steubing et al 2022)
Ecoinvent	Natural Gas	NG	Unknown	732.707	g/kWh	De-regionalized (Steubing et al 2022)
Ecoinvent	Natural Gas	NG	Unknown	388.158	g/kWh	De-regionalized (Steubing et al 2022)
Ecoinvent	Natural Gas	NG	Unknown	742.193	g/kWh	De-regionalized (Steubing et al 2022)
Ecoinvent	Natural Gas	NG	Unknown	634.067	g/kWh	De-regionalized (Steubing et al 2022)
Ecoinvent	Natural Gas	NG	Unknown	594.116	g/kWh	De-regionalized (Steubing et al 2022)
Ecoinvent	Natural Gas	NG	Unknown	649.781	g/kWh	De-regionalized (Steubing et al 2022)
Ecoinvent	Natural Gas	NG	Unknown	619.419	g/kWh	De-regionalized (Steubing et al 2022)
Ecoinvent	Natural Gas	NG	Unknown	702.381	g/kWh	De-regionalized (Steubing et al 2022)
Ecoinvent	Natural Gas	NG	Unknown	784.449	g/kWh	De-regionalized (Steubing et al 2022)
Ecoinvent	Natural Gas	NG	Unknown	698.307	g/kWh	De-regionalized (Steubing et al 2022)
Ecoinvent	Natural Gas	NG	Unknown	673.67	g/kWh	De-regionalized (Steubing et al 2022)
Ecoinvent	Natural Gas	NG	Unknown	498.575	g/kWh	De-regionalized (Steubing et al 2022)
Ecoinvent	Natural Gas	NG	Unknown	424.39	g/kWh	De-regionalized (Steubing et al 2022)
Ecoinvent	Natural Gas	NG	Unknown	428.398	g/kWh	De-regionalized (Steubing et al 2022)
Ecoinvent	Natural Gas	NG	Unknown	674.584	g/kWh	De-regionalized (Steubing et al 2022)
Ecoinvent	Natural Gas	NG	Unknown	444.077	g/kWh	De-regionalized (Steubing et al 2022)
Ecoinvent	Natural Gas	NG	Unknown	703.461	g/kWh	De-regionalized (Steubing et al 2022)
Ecoinvent	Natural Gas	NG	Unknown	356.048	g/kWh	De-regionalized (Steubing et al 2022)
Ecoinvent	Natural Gas	NG	Unknown	520.995	g/kWh	De-regionalized (Steubing et al 2022)
Ecoinvent	Natural Gas	NG	Unknown	384.362	g/kWh	De-regionalized (Steubing et al 2022)
Ecoinvent	Natural Gas	NG	Unknown	462.743	g/kWh	De-regionalized (Steubing et al 2022)
Ecoinvent	Natural Gas	NG	Unknown	510.494	g/kWh	De-regionalized (Steubing et al 2022)
Ecoinvent	Natural Gas	NG	Unknown	1033.82	g/kWh	De-regionalized (Steubing et al 2022)
Ecoinvent	Natural Gas	NG	Unknown	572.604	g/kWh	De-regionalized (Steubing et al 2022)
Ecoinvent	Natural Gas	NG	Unknown	732.372	g/kWh	De-regionalized (Steubing et al 2022)
Ecoinvent	Natural Gas	NG	Unknown	426.64	g/kWh	De-regionalized (Steubing et al 2022)
Ecoinvent	Natural Gas	NG	Unknown	622.522	g/kWh	De-regionalized (Steubing et al 2022)
Ecoinvent	Natural Gas	NG	Unknown	436.325	g/kWh	De-regionalized (Steubing et al 2022)
Ecoinvent	Natural Gas	NG	Unknown	591.836	g/kWh	De-regionalized (Steubing et al 2022)
Ecoinvent	Natural Gas	NG	Unknown	442.619	g/kWh	De-regionalized (Steubing et al 2022)
Ecoinvent	Natural Gas	NG	Unknown	678.321	g/kWh	De-regionalized (Steubing et al 2022)
Ecoinvent	Natural Gas	NG	Unknown	438.077	g/kWh	De-regionalized (Steubing et al 2022)
Ecoinvent	Natural Gas	NG	Unknown	591.836	g/kWh	De-regionalized (Steubing et al 2022)
Ecoinvent	Natural Gas	NG	Unknown	437.701	g/kWh	De-regionalized (Steubing et al 2022)
Ecoinvent	Natural Gas	NG	Unknown	660.626	g/kWh	De-regionalized (Steubing et al 2022)
Ecoinvent	Natural Gas	NG	Unknown	436.325	g/kWh	De-regionalized (Steubing et al 2022)
Ecoinvent	Natural Gas	NG	Unknown	591.836	g/kWh	De-regionalized (Steubing et al 2022)
Ecoinvent	Natural Gas	NG	Unknown	432.891	g/kWh	De-regionalized (Steubing et al 2022)
Ecoinvent	Natural Gas	NG	Unknown	644.344	g/kWh	De-regionalized (Steubing et al 2022)
Ecoinvent	Natural Gas	NG	Unknown	436.325	g/kWh	De-regionalized (Steubing et al 2022)
Ecoinvent	Natural Gas	NG	Unknown	591.836	g/kWh	De-regionalized (Steubing et al 2022)
Ecoinvent	Natural Gas	NG	Unknown	461.638	g/kWh	De-regionalized (Steubing et al 2022)
Ecoinvent	Natural Gas	NG	Unknown	747.265	g/kWh	De-regionalized (Steubing et al 2022)
Ecoinvent	Natural Gas	NG	Unknown	513.323	g/kWh	De-regionalized (Steubing et al 2022)
Ecoinvent	Natural Gas	NG	Unknown	591.836	g/kWh	De-regionalized (Steubing et al 2022)
Ecoinvent	Natural Gas	NG	Unknown	460.738	g/kWh	De-regionalized (Steubing et al 2022)
Ecoinvent	Natural Gas	NG	Unknown	747.176	g/kWh	De-regionalized (Steubing et al 2022)
Ecoinvent	Natural Gas	NG	Unknown	507.354	g/kWh	De-regionalized (Steubing et al 2022)
Ecoinvent	Natural Gas	NG	Unknown	591.836	g/kWh	De-regionalized (Steubing et al 2022)
Ecoinvent	Natural Gas	NG	Unknown	432.891	g/kWh	De-regionalized (Steubing et al 2022)
Ecoinvent	Natural Gas	NG	Unknown	645.654	g/kWh	De-regionalized (Steubing et al 2022)
Ecoinvent	Natural Gas	NG	Unknown	436.325	g/kWh	De-regionalized (Steubing et al 2022)
Ecoinvent	Natural Gas	NG	Unknown	591.836	g/kWh	De-regionalized (Steubing et al 2022)
Ecoinvent	Natural Gas	NG	Unknown	417.595	g/kWh	De-regionalized (Steubing et al 2022)
Ecoinvent	Natural Gas	NG	Unknown	598.831	g/kWh	De-regionalized (Steubing et al 2022)
Ecoinvent	Natural Gas	NG	Unknown	436.325	g/kWh	De-regionalized (Steubing et al 2022)
Ecoinvent	Natural Gas	NG	Unknown	591.836	g/kWh	De-regionalized (Steubing et al 2022)
Ecoinvent	Natural Gas	NG	Unknown	511.697	g/kWh	De-regionalized (Steubing et al 2022)
Ecoinvent	Natural Gas	NG	Unknown	801.221	g/kWh	De-regionalized (Steubing et al 2022)
Ecoinvent	Natural Gas	NG	Unknown	427.569	g/kWh	De-regionalized (Steubing et al 2022)
Ecoinvent	Natural Gas	NG	Unknown	684.994	g/kWh	De-regionalized (Steubing et al 2022)
Ecoinvent	Natural Gas	NG	Unknown	448.384	g/kWh	De-regionalized (Steubing et al 2022)
Ecoinvent	Natural Gas	NG	Unknown	722.926	g/kWh	De-regionalized (Steubing et al 2022)
Ecoinvent	Natural Gas	NG	Unknown	421.857	g/kWh	De-regionalized (Steubing et al 2022)
Ecoinvent	Natural Gas	NG	Unknown	767.952	g/kWh	De-regionalized (Steubing et al 2022)
Ecoinvent	Natural Gas	NG	Unknown	570.495	g/kWh	De-regionalized (Steubing et al 2022)
Ecoinvent	Natural Gas	NG	Unknown	681.965	g/kWh	De-regionalized (Steubing et al 2022)
Ecoinvent	Natural Gas	NG	Unknown	500.475	g/kWh	De-regionalized (Steubing et al 2022)
Ecoinvent	Natural Gas	NG	Unknown	672.257	g/kWh	De-regionalized (Steubing et al 2022)
Ecoinvent	Natural Gas	NG	Unknown	809.357	g/kWh	De-regionalized (Steubing et al 2022)
Ecoinvent	Natural Gas	NG	Unknown	432.18	g/kWh	De-regionalized (Steubing et al 2022)
Ecoinvent	Natural Gas	NG	Unknown	641.707	g/kWh	De-regionalized (Steubing et al 2022)
Ecoinvent	Natural Gas	NG	Unknown	963.797	g/kWh	De-regionalized (Steubing et al 2022)
Ecoinvent	Natural Gas	NG	Unknown	683.984	g/kWh	De-regionalized (Steubing et al 2022)
Ecoinvent	Natural Gas	NG	Unknown	643.299	g/kWh	De-regionalized (Steubing et al 2022)
Ecoinvent	Natural Gas	NG	Unknown	421.054	g/kWh	De-regionalized (Steubing et al 2022)
Ecoinvent	Natural Gas	NG	Unknown	691.396	g/kWh	De-regionalized (Steubing et al 2022)
Ecoinvent	Natural Gas	NG	Unknown	362.524	g/kWh	De-regionalized (Steubing et al 2022)
Ecoinvent	Natural Gas	NG	Unknown	478.916	g/kWh	De-regionalized (Steubing et al 2022)
Ecoinvent	Natural Gas	NG	Unknown	418.661	g/kWh	De-regionalized (Steubing et al 2022)
Ecoinvent	Natural Gas	NG	Unknown	784.234	g/kWh	De-regionalized (Steubing et al 2022)
Ecoinvent	Natural Gas	NG	Unknown	495.252	g/kWh	De-regionalized (Steubing et al 2022)
Ecoinvent	Natural Gas	NG	Unknown	676.535	g/kWh	De-regionalized (Steubing et al 2022)
Ecoinvent	Natural Gas	NG	Unknown	631.526	g/kWh	De-regionalized (Steubing et al 2022)
Ecoinvent	Natural Gas	NG	Unknown	587.867	g/kWh	De-regionalized (Steubing et al 2022)
Ecoinvent	Natural Gas	NG	Unknown	699.677	g/kWh	De-regionalized (Steubing et al 2022)
Ecoinvent	Natural Gas	NG	Unknown	784.221	g/kWh	De-regionalized (Steubing et al 2022)
Ecoinvent	Hydro	HY	Unknown	1374.99	g/kWh	De-regionalized (Steubing et al 2022)
Ecoinvent	Hydro	HY	Unknown	4.40444	g/kWh	De-regionalized (Steubing et al 2022)
Ecoinvent	Hydro	HY	Unknown	450.892	g/kWh	De-regionalized (Steubing et al 2022)
Ecoinvent	Hydro	HY	Unknown	6.96185	g/kWh	De-regionalized (Steubing et al 2022)
Ecoinvent	Hydro	HY	Unknown	4.41203	g/kWh	De-regionalized (Steubing et al 2022)
Ecoinvent	Hydro	HY	Unknown	337.084	g/kWh	De-regionalized (Steubing et al 2022)
Ecoinvent	Hydro	HY	Unknown	4.41203	g/kWh	De-regionalized (Steubing et al 2022)
Ecoinvent	Hydro	HY	Unknown	45.2949	g/kWh	De-regionalized (Steubing et al 2022)
Ecoinvent	Hydro	HY	Unknown	900.28	g/kWh	De-regionalized (Steubing et al 2022)
Ecoinvent	Hydro	HY	Unknown	4.41203	g/kWh	De-regionalized (Steubing et al 2022)
Ecoinvent	Hydro	HY	Unknown	1306.27	g/kWh	De-regionalized (Steubing et al 2022)
Ecoinvent	Hydro	HY	Unknown	6.95427	g/kWh	De-regionalized (Steubing et al 2022)
Ecoinvent	Hydro	HY	Unknown	4.40444	g/kWh	De-regionalized (Steubing et al 2022)
Ecoinvent	Hydro	HY	Unknown	151.677	g/kWh	De-regionalized (Steubing et al 2022)
Ecoinvent	Hydro	HY	Unknown	6.95427	g/kWh	De-regionalized (Steubing et al 2022)
Ecoinvent	Hydro	HY	Unknown	4.40444	g/kWh	De-regionalized (Steubing et al 2022)
Ecoinvent	Hydro	HY	Unknown	51.7135	g/kWh	De-regionalized (Steubing et al 2022)
Ecoinvent	Hydro	HY	Unknown	12.3489	g/kWh	De-regionalized (Steubing et al 2022)
Ecoinvent	Hydro	HY	Unknown	4.40444	g/kWh	De-regionalized (Steubing et al 2022)
Ecoinvent	Hydro	HY	Unknown	609.852	g/kWh	De-regionalized (Steubing et al 2022)
Ecoinvent	Hydro	HY	Unknown	12.3489	g/kWh	De-regionalized (Steubing et al 2022)
Ecoinvent	Hydro	HY	Unknown	4.40444	g/kWh	De-regionalized (Steubing et al 2022)
Ecoinvent	Hydro	HY	Unknown	12.3489	g/kWh	De-regionalized (Steubing et al 2022)
Ecoinvent	Hydro	HY	Unknown	4.40444	g/kWh	De-regionalized (Steubing et al 2022)
Ecoinvent	Hydro	HY	Unknown	1387.57	g/kWh	De-regionalized (Steubing et al 2022)
Ecoinvent	Hydro	HY	Unknown	12.3489	g/kWh	De-regionalized (Steubing et al 2022)
Ecoinvent	Hydro	HY	Unknown	4.40444	g/kWh	De-regionalized (Steubing et al 2022)
Ecoinvent	Hydro	HY	Unknown	494.3	g/kWh	De-regionalized (Steubing et al 2022)
Ecoinvent	Hydro	HY	Unknown	6.95427	g/kWh	De-regionalized (Steubing et al 2022)
Ecoinvent	Hydro	HY	Unknown	12.3489	g/kWh	De-regionalized (Steubing et al 2022)
Ecoinvent	Hydro	HY	Unknown	4.40444	g/kWh	De-regionalized (Steubing et al 2022)
Ecoinvent	Hydro	HY	Unknown	136.655	g/kWh	De-regionalized (Steubing et al 2022)
Ecoinvent	Hydro	HY	Unknown	12.3489	g/kWh	De-regionalized (Steubing et al 2022)
Ecoinvent	Hydro	HY	Unknown	4.40444	g/kWh	De-regionalized (Steubing et al 2022)
Ecoinvent	Hydro	HY	Unknown	12.3489	g/kWh	De-regionalized (Steubing et al 2022)
Ecoinvent	Hydro	HY	Unknown	4.40444	g/kWh	De-regionalized (Steubing et al 2022)
Ecoinvent	Hydro	HY	Unknown	3.95689	g/kWh	De-regionalized (Steubing et al 2022)
Ecoinvent	Hydro	HY	Unknown	5.52014	g/kWh	De-regionalized (Steubing et al 2022)
Ecoinvent	Hydro	HY	Unknown	1034.11	g/kWh	De-regionalized (Steubing et al 2022)
Ecoinvent	Hydro	HY	Unknown	12.3489	g/kWh	De-regionalized (Steubing et al 2022)
Ecoinvent	Hydro	HY	Unknown	4.40444	g/kWh	De-regionalized (Steubing et al 2022)
Ecoinvent	Hydro	HY	Unknown	100.176	g/kWh	De-regionalized (Steubing et al 2022)
Ecoinvent	Hydro	HY	Unknown	6.95427	g/kWh	De-regionalized (Steubing et al 2022)
Ecoinvent	Hydro	HY	Unknown	4.40444	g/kWh	De-regionalized (Steubing et al 2022)
Ecoinvent	Hydro	HY	Unknown	1625.43	g/kWh	De-regionalized (Steubing et al 2022)
Ecoinvent	Hydro	HY	Unknown	4.40444	g/kWh	De-regionalized (Steubing et al 2022)
Ecoinvent	Hydro	HY	Unknown	4.40444	g/kWh	De-regionalized (Steubing et al 2022)
Ecoinvent	Hydro	HY	Unknown	4.40444	g/kWh	De-regionalized (Steubing et al 2022)
Ecoinvent	Hydro	HY	Unknown	1625.43	g/kWh	De-regionalized (Steubing et al 2022)
Ecoinvent	Hydro	HY	Unknown	4.40444	g/kWh	De-regionalized (Steubing et al 2022)
Ecoinvent	Hydro	HY	Unknown	1534.01	g/kWh	De-regionalized (Steubing et al 2022)
Ecoinvent	Hydro	HY	Unknown	4.40444	g/kWh	De-regionalized (Steubing et al 2022)
Ecoinvent	Hydro	HY	Unknown	4.40444	g/kWh	De-regionalized (Steubing et al 2022)
Ecoinvent	Hydro	HY	Unknown	4.40444	g/kWh	De-regionalized (Steubing et al 2022)
Ecoinvent	Hydro	HY	Unknown	4.40444	g/kWh	De-regionalized (Steubing et al 2022)
Ecoinvent	Hydro	HY	Unknown	4.40444	g/kWh	De-regionalized (Steubing et al 2022)
Ecoinvent	Hydro	HY	Unknown	1625.43	g/kWh	De-regionalized (Steubing et al 2022)
Ecoinvent	Hydro	HY	Unknown	4.40444	g/kWh	De-regionalized (Steubing et al 2022)
Ecoinvent	Hydro	HY	Unknown	1625.43	g/kWh	De-regionalized (Steubing et al 2022)
Ecoinvent	Hydro	HY	Unknown	4.40444	g/kWh	De-regionalized (Steubing et al 2022)
Ecoinvent	Hydro	HY	Unknown	4.40444	g/kWh	De-regionalized (Steubing et al 2022)
Ecoinvent	Hydro	HY	Unknown	1625.43	g/kWh	De-regionalized (Steubing et al 2022)
Ecoinvent	Hydro	HY	Unknown	4.40444	g/kWh	De-regionalized (Steubing et al 2022)
Ecoinvent	Hydro	HY	Unknown	1625.43	g/kWh	De-regionalized (Steubing et al 2022)
Ecoinvent	Hydro	HY	Unknown	4.40444	g/kWh	De-regionalized (Steubing et al 2022)
Ecoinvent	Hydro	HY	Unknown	4.40444	g/kWh	De-regionalized (Steubing et al 2022)
Ecoinvent	Hydro	HY	Unknown	1625.43	g/kWh	De-regionalized (Steubing et al 2022)
Ecoinvent	Hydro	HY	Unknown	4.40444	g/kWh	De-regionalized (Steubing et al 2022)
Ecoinvent	Hydro	HY	Unknown	4.40444	g/kWh	De-regionalized (Steubing et al 2022)
Ecoinvent	Hydro	HY	Unknown	1625.43	g/kWh	De-regionalized (Steubing et al 2022)
Ecoinvent	Hydro	HY	Unknown	4.40444	g/kWh	De-regionalized (Steubing et al 2022)
Ecoinvent	Hydro	HY	Unknown	4.40444	g/kWh	De-regionalized (Steubing et al 2022)
Ecoinvent	Hydro	HY	Unknown	4.40444	g/kWh	De-regionalized (Steubing et al 2022)
Ecoinvent	Hydro	HY	Unknown	4.40444	g/kWh	De-regionalized (Steubing et al 2022)
Ecoinvent	Hydro	HY	Unknown	4.40444	g/kWh	De-regionalized (Steubing et al 2022)
Ecoinvent	Hydro	HY	Unknown	4.40444	g/kWh	De-regionalized (Steubing et al 2022)
Ecoinvent	Hydro	HY	Unknown	1625.43	g/kWh	De-regionalized (Steubing et al 2022)
Ecoinvent	Hydro	HY	Unknown	4.40444	g/kWh	De-regionalized (Steubing et al 2022)
Ecoinvent	Hydro	HY	Unknown	1625.43	g/kWh	De-regionalized (Steubing et al 2022)
Ecoinvent	Hydro	HY	Unknown	4.40444	g/kWh	De-regionalized (Steubing et al 2022)
Ecoinvent	Hydro	HY	Unknown	4.40444	g/kWh	De-regionalized (Steubing et al 2022)
Ecoinvent	Hydro	HY	Unknown	4.40444	g/kWh	De-regionalized (Steubing et al 2022)
Ecoinvent	Hydro	HY	Unknown	4.40444	g/kWh	De-regionalized (Steubing et al 2022)
Ecoinvent	Hydro	HY	Unknown	4.40444	g/kWh	De-regionalized (Steubing et al 2022)
Ecoinvent	Hydro	HY	Unknown	1625.43	g/kWh	De-regionalized (Steubing et al 2022)
Ecoinvent	Hydro	HY	Unknown	4.40444	g/kWh	De-regionalized (Steubing et al 2022)
Ecoinvent	Hydro	HY	Unknown	1100.9	g/kWh	De-regionalized (Steubing et al 2022)
Ecoinvent	Hydro	HY	Unknown	12.3565	g/kWh	De-regionalized (Steubing et al 2022)
Ecoinvent	Hydro	HY	Unknown	4.41203	g/kWh	De-regionalized (Steubing et al 2022)
Ecoinvent	Hydro	HY	Unknown	4.41203	g/kWh	De-regionalized (Steubing et al 2022)
Ecoinvent	Hydro	HY	Unknown	4.41203	g/kWh	De-regionalized (Steubing et al 2022)
Ecoinvent	Hydro	HY	Unknown	12.3565	g/kWh	De-regionalized (Steubing et al 2022)
Ecoinvent	Hydro	HY	Unknown	4.41203	g/kWh	De-regionalized (Steubing et al 2022)
Ecoinvent	Hydro	HY	Unknown	76.079	g/kWh	De-regionalized (Steubing et al 2022)
Ecoinvent	Hydro	HY	Unknown	6.96185	g/kWh	De-regionalized (Steubing et al 2022)
Ecoinvent	Hydro	HY	Unknown	4.41203	g/kWh	De-regionalized (Steubing et al 2022)
Ecoinvent	Hydro	HY	Unknown	924.379	g/kWh	De-regionalized (Steubing et al 2022)
Ecoinvent	Hydro	HY	Unknown	12.3565	g/kWh	De-regionalized (Steubing et al 2022)
Ecoinvent	Hydro	HY	Unknown	4.41203	g/kWh	De-regionalized (Steubing et al 2022)
Ecoinvent	Hydro	HY	Unknown	1376.8	g/kWh	De-regionalized (Steubing et al 2022)
Ecoinvent	Hydro	HY	Unknown	4.41203	g/kWh	De-regionalized (Steubing et al 2022)
Ecoinvent	Hydro	HY	Unknown	4.41203	g/kWh	De-regionalized (Steubing et al 2022)
Ecoinvent	Hydro	HY	Unknown	580.014	g/kWh	De-regionalized (Steubing et al 2022)
Ecoinvent	Hydro	HY	Unknown	6.96185	g/kWh	De-regionalized (Steubing et al 2022)
Ecoinvent	Hydro	HY	Unknown	4.41203	g/kWh	De-regionalized (Steubing et al 2022)
Ecoinvent	Hydro	HY	Unknown	2029.05	g/kWh	De-regionalized (Steubing et al 2022)
Ecoinvent	Hydro	HY	Unknown	6.95427	g/kWh	De-regionalized (Steubing et al 2022)
Ecoinvent	Hydro	HY	Unknown	4.40444	g/kWh	De-regionalized (Steubing et al 2022)
Ecoinvent	Hydro	HY	Unknown	4.40444	g/kWh	De-regionalized (Steubing et al 2022)
Ecoinvent	Hydro	HY	Unknown	6.95427	g/kWh	De-regionalized (Steubing et al 2022)
Ecoinvent	Hydro	HY	Unknown	4.40444	g/kWh	De-regionalized (Steubing et al 2022)
Ecoinvent	Hydro	HY	Unknown	2490.08	g/kWh	De-regionalized (Steubing et al 2022)
Ecoinvent	Hydro	HY	Unknown	6.95427	g/kWh	De-regionalized (Steubing et al 2022)
Ecoinvent	Hydro	HY	Unknown	6.95427	g/kWh	De-regionalized (Steubing et al 2022)
Ecoinvent	Hydro	HY	Unknown	2295.41	g/kWh	De-regionalized (Steubing et al 2022)
Ecoinvent	Hydro	HY	Unknown	6.95427	g/kWh	De-regionalized (Steubing et al 2022)
Ecoinvent	Hydro	HY	Unknown	4.40444	g/kWh	De-regionalized (Steubing et al 2022)
Ecoinvent	Hydro	HY	Unknown	6.95427	g/kWh	De-regionalized (Steubing et al 2022)
Ecoinvent	Hydro	HY	Unknown	4.40444	g/kWh	De-regionalized (Steubing et al 2022)
Ecoinvent	Hydro	HY	Unknown	6.95427	g/kWh	De-regionalized (Steubing et al 2022)
Ecoinvent	Hydro	HY	Unknown	4.40444	g/kWh	De-regionalized (Steubing et al 2022)
Ecoinvent	Hydro	HY	Unknown	6.95427	g/kWh	De-regionalized (Steubing et al 2022)
Ecoinvent	Hydro	HY	Unknown	4.40444	g/kWh	De-regionalized (Steubing et al 2022)
Ecoinvent	Hydro	HY	Unknown	6.95427	g/kWh	De-regionalized (Steubing et al 2022)
Ecoinvent	Hydro	HY	Unknown	4.40444	g/kWh	De-regionalized (Steubing et al 2022)
Ecoinvent	Hydro	HY	Unknown	2295.41	g/kWh	De-regionalized (Steubing et al 2022)
Ecoinvent	Hydro	HY	Unknown	6.95427	g/kWh	De-regionalized (Steubing et al 2022)
Ecoinvent	Hydro	HY	Unknown	4.40444	g/kWh	De-regionalized (Steubing et al 2022)
Ecoinvent	Hydro	HY	Unknown	6.95427	g/kWh	De-regionalized (Steubing et al 2022)
Ecoinvent	Hydro	HY	Unknown	4.40444	g/kWh	De-regionalized (Steubing et al 2022)
Ecoinvent	Hydro	HY	Unknown	6.95427	g/kWh	De-regionalized (Steubing et al 2022)
Ecoinvent	Hydro	HY	Unknown	6.95427	g/kWh	De-regionalized (Steubing et al 2022)
Ecoinvent	Hydro	HY	Unknown	4.40444	g/kWh	De-regionalized (Steubing et al 2022)
Ecoinvent	Hydro	HY	Unknown	6.95427	g/kWh	De-regionalized (Steubing et al 2022)
Ecoinvent	Hydro	HY	Unknown	6.95427	g/kWh	De-regionalized (Steubing et al 2022)
Ecoinvent	Hydro	HY	Unknown	6.95427	g/kWh	De-regionalized (Steubing et al 2022)
Ecoinvent	Hydro	HY	Unknown	4.40444	g/kWh	De-regionalized (Steubing et al 2022)
Ecoinvent	Hydro	HY	Unknown	6.95427	g/kWh	De-regionalized (Steubing et al 2022)
Ecoinvent	Hydro	HY	Unknown	4.40444	g/kWh	De-regionalized (Steubing et al 2022)
Ecoinvent	Hydro	HY	Unknown	4.40444	g/kWh	De-regionalized (Steubing et al 2022)
Ecoinvent	Hydro	HY	Unknown	2029.05	g/kWh	De-regionalized (Steubing et al 2022)
Ecoinvent	Hydro	HY	Unknown	6.95427	g/kWh	De-regionalized (Steubing et al 2022)
Ecoinvent	Hydro	HY	Unknown	4.40444	g/kWh	De-regionalized (Steubing et al 2022)
Ecoinvent	Hydro	HY	Unknown	6.95427	g/kWh	De-regionalized (Steubing et al 2022)
Ecoinvent	Hydro	HY	Unknown	4.40444	g/kWh	De-regionalized (Steubing et al 2022)
Ecoinvent	Hydro	HY	Unknown	6.95427	g/kWh	De-regionalized (Steubing et al 2022)
Ecoinvent	Hydro	HY	Unknown	4.40444	g/kWh	De-regionalized (Steubing et al 2022)
Ecoinvent	Hydro	HY	Unknown	2490.08	g/kWh	De-regionalized (Steubing et al 2022)
Ecoinvent	Hydro	HY	Unknown	4.40444	g/kWh	De-regionalized (Steubing et al 2022)
Ecoinvent	Hydro	HY	Unknown	45.2949	g/kWh	De-regionalized (Steubing et al 2022)
Ecoinvent	Hydro	HY	Unknown	811.597	g/kWh	De-regionalized (Steubing et al 2022)
Ecoinvent	Hydro	HY	Unknown	4.41203	g/kWh	De-regionalized (Steubing et al 2022)
Ecoinvent	Hydro	HY	Unknown	614.146	g/kWh	De-regionalized (Steubing et al 2022)
Ecoinvent	Hydro	HY	Unknown	6.96185	g/kWh	De-regionalized (Steubing et al 2022)
Ecoinvent	Hydro	HY	Unknown	4.41203	g/kWh	De-regionalized (Steubing et al 2022)
Ecoinvent	Hydro	HY	Unknown	1091.55	g/kWh	De-regionalized (Steubing et al 2022)
Ecoinvent	Hydro	HY	Unknown	6.95427	g/kWh	De-regionalized (Steubing et al 2022)
Ecoinvent	Hydro	HY	Unknown	4.40444	g/kWh	De-regionalized (Steubing et al 2022)
Ecoinvent	Hydro	HY	Unknown	6.96185	g/kWh	De-regionalized (Steubing et al 2022)
Ecoinvent	Hydro	HY	Unknown	4.41203	g/kWh	De-regionalized (Steubing et al 2022)
Ecoinvent	Hydro	HY	Unknown	993.835	g/kWh	De-regionalized (Steubing et al 2022)
Ecoinvent	Hydro	HY	Unknown	4.41203	g/kWh	De-regionalized (Steubing et al 2022)
Ecoinvent	Hydro	HY	Unknown	744.083	g/kWh	De-regionalized (Steubing et al 2022)
Ecoinvent	Hydro	HY	Unknown	4.41203	g/kWh	De-regionalized (Steubing et al 2022)
Ecoinvent	Hydro	HY	Unknown	4.40444	g/kWh	De-regionalized (Steubing et al 2022)
Ecoinvent	Hydro	HY	Unknown	4.41203	g/kWh	De-regionalized (Steubing et al 2022)
Ecoinvent	Hydro	HY	Unknown	41.4599	g/kWh	De-regionalized (Steubing et al 2022)
Ecoinvent	Hydro	HY	Unknown	6.96185	g/kWh	De-regionalized (Steubing et al 2022)
Ecoinvent	Hydro	HY	Unknown	1416.2	g/kWh	De-regionalized (Steubing et al 2022)
Ecoinvent	Hydro	HY	Unknown	4.41203	g/kWh	De-regionalized (Steubing et al 2022)
Ecoinvent	Hydro	HY	Unknown	541.064	g/kWh	De-regionalized (Steubing et al 2022)
Ecoinvent	Hydro	HY	Unknown	12.3565	g/kWh	De-regionalized (Steubing et al 2022)
Ecoinvent	Hydro	HY	Unknown	4.41203	g/kWh	De-regionalized (Steubing et al 2022)
Ecoinvent	Hydro	HY	Unknown	628.759	g/kWh	De-regionalized (Steubing et al 2022)
Ecoinvent	Hydro	HY	Unknown	4.41203	g/kWh	De-regionalized (Steubing et al 2022)
Ecoinvent	Hydro	HY	Unknown	1054.16	g/kWh	De-regionalized (Steubing et al 2022)
Ecoinvent	Hydro	HY	Unknown	12.3489	g/kWh	De-regionalized (Steubing et al 2022)
Ecoinvent	Hydro	HY	Unknown	4.40444	g/kWh	De-regionalized (Steubing et al 2022)
Ecoinvent	Hydro	HY	Unknown	641.809	g/kWh	De-regionalized (Steubing et al 2022)
Ecoinvent	Hydro	HY	Unknown	12.3565	g/kWh	De-regionalized (Steubing et al 2022)
Ecoinvent	Hydro	HY	Unknown	4.41203	g/kWh	De-regionalized (Steubing et al 2022)
Ecoinvent	Hydro	HY	Unknown	616.056	g/kWh	De-regionalized (Steubing et al 2022)
Ecoinvent	Hydro	HY	Unknown	4.41203	g/kWh	De-regionalized (Steubing et al 2022)
Ecoinvent	Hydro	HY	Unknown	1593.9	g/kWh	De-regionalized (Steubing et al 2022)
Ecoinvent	Hydro	HY	Unknown	12.3489	g/kWh	De-regionalized (Steubing et al 2022)
Ecoinvent	Hydro	HY	Unknown	4.40444	g/kWh	De-regionalized (Steubing et al 2022)
Ecoinvent	Hydro	HY	Unknown	918.892	g/kWh	De-regionalized (Steubing et al 2022)
Ecoinvent	Hydro	HY	Unknown	12.3489	g/kWh	De-regionalized (Steubing et al 2022)
Ecoinvent	Hydro	HY	Unknown	4.40444	g/kWh	De-regionalized (Steubing et al 2022)
Ecoinvent	Hydro	HY	Unknown	501.734	g/kWh	De-regionalized (Steubing et al 2022)
Ecoinvent	Hydro	HY	Unknown	12.3565	g/kWh	De-regionalized (Steubing et al 2022)
Ecoinvent	Hydro	HY	Unknown	4.41203	g/kWh	De-regionalized (Steubing et al 2022)
Ecoinvent	Hydro	HY	Unknown	58.1015	g/kWh	De-regionalized (Steubing et al 2022)
Ecoinvent	Hydro	HY	Unknown	12.3565	g/kWh	De-regionalized (Steubing et al 2022)
Ecoinvent	Hydro	HY	Unknown	4.41203	g/kWh	De-regionalized (Steubing et al 2022)
Ecoinvent	Hydro	HY	Unknown	176.977	g/kWh	De-regionalized (Steubing et al 2022)
Ecoinvent	Hydro	HY	Unknown	6.96433	g/kWh	De-regionalized (Steubing et al 2022)
Ecoinvent	Hydro	HY	Unknown	4.4145	g/kWh	De-regionalized (Steubing et al 2022)
Ecoinvent	Hydro	HY	Unknown	12.3489	g/kWh	De-regionalized (Steubing et al 2022)
Ecoinvent	Hydro	HY	Unknown	4.40444	g/kWh	De-regionalized (Steubing et al 2022)
Ecoinvent	Hydro	HY	Unknown	1106.91	g/kWh	De-regionalized (Steubing et al 2022)
Ecoinvent	Hydro	HY	Unknown	4.41203	g/kWh	De-regionalized (Steubing et al 2022)
Ecoinvent	Hydro	HY	Unknown	950.577	g/kWh	De-regionalized (Steubing et al 2022)
Ecoinvent	Hydro	HY	Unknown	6.95427	g/kWh	De-regionalized (Steubing et al 2022)
Ecoinvent	Hydro	HY	Unknown	4.40444	g/kWh	De-regionalized (Steubing et al 2022)
Ecoinvent	Hydro	HY	Unknown	926.97	g/kWh	De-regionalized (Steubing et al 2022)
Ecoinvent	Hydro	HY	Unknown	12.3489	g/kWh	De-regionalized (Steubing et al 2022)
Ecoinvent	Hydro	HY	Unknown	4.40444	g/kWh	De-regionalized (Steubing et al 2022)
Ecoinvent	Hydro	HY	Unknown	1298.43	g/kWh	De-regionalized (Steubing et al 2022)
Ecoinvent	Hydro	HY	Unknown	12.3489	g/kWh	De-regionalized (Steubing et al 2022)
Ecoinvent	Hydro	HY	Unknown	4.40444	g/kWh	De-regionalized (Steubing et al 2022)
Ecoinvent	Hydro	HY	Unknown	1073.11	g/kWh	De-regionalized (Steubing et al 2022)
Ecoinvent	Hydro	HY	Unknown	6.95427	g/kWh	De-regionalized (Steubing et al 2022)
Ecoinvent	Hydro	HY	Unknown	4.40444	g/kWh	De-regionalized (Steubing et al 2022)
Ecoinvent	Hydro	HY	Unknown	426.967	g/kWh	De-regionalized (Steubing et al 2022)
Ecoinvent	Hydro	HY	Unknown	6.95427	g/kWh	De-regionalized (Steubing et al 2022)
Ecoinvent	Hydro	HY	Unknown	4.40444	g/kWh	De-regionalized (Steubing et al 2022)
Ecoinvent	Hydro	HY	Unknown	1056.4	g/kWh	De-regionalized (Steubing et al 2022)
Ecoinvent	Hydro	HY	Unknown	6.95427	g/kWh	De-regionalized (Steubing et al 2022)
Ecoinvent	Hydro	HY	Unknown	4.40444	g/kWh	De-regionalized (Steubing et al 2022)
Ecoinvent	Hydro	HY	Unknown	1051.17	g/kWh	De-regionalized (Steubing et al 2022)
Ecoinvent	Hydro	HY	Unknown	6.95427	g/kWh	De-regionalized (Steubing et al 2022)
Ecoinvent	Hydro	HY	Unknown	4.40444	g/kWh	De-regionalized (Steubing et al 2022)
Ecoinvent	Hydro	HY	Unknown	1132.91	g/kWh	De-regionalized (Steubing et al 2022)
Ecoinvent	Hydro	HY	Unknown	12.3489	g/kWh	De-regionalized (Steubing et al 2022)
Ecoinvent	Hydro	HY	Unknown	4.40444	g/kWh	De-regionalized (Steubing et al 2022)
Ecoinvent	Hydro	HY	Unknown	1026.56	g/kWh	De-regionalized (Steubing et al 2022)
Ecoinvent	Hydro	HY	Unknown	12.3489	g/kWh	De-regionalized (Steubing et al 2022)
Ecoinvent	Hydro	HY	Unknown	4.40444	g/kWh	De-regionalized (Steubing et al 2022)
Ecoinvent	Hydro	HY	Unknown	714.287	g/kWh	De-regionalized (Steubing et al 2022)
Ecoinvent	Hydro	HY	Unknown	6.95427	g/kWh	De-regionalized (Steubing et al 2022)
Ecoinvent	Hydro	HY	Unknown	4.40444	g/kWh	De-regionalized (Steubing et al 2022)
Ecoinvent	Hydro	HY	Unknown	45.2949	g/kWh	De-regionalized (Steubing et al 2022)
Ecoinvent	Hydro	HY	Unknown	4.40444	g/kWh	De-regionalized (Steubing et al 2022)
Ecoinvent	Hydro	HY	Unknown	45.2949	g/kWh	De-regionalized (Steubing et al 2022)
Ecoinvent	Hydro	HY	Unknown	6.95427	g/kWh	De-regionalized (Steubing et al 2022)
Ecoinvent	Hydro	HY	Unknown	4.40444	g/kWh	De-regionalized (Steubing et al 2022)
Ecoinvent	Hydro	HY	Unknown	6.95427	g/kWh	De-regionalized (Steubing et al 2022)
Ecoinvent	Hydro	HY	Unknown	1139.58	g/kWh	De-regionalized (Steubing et al 2022)
Ecoinvent	Hydro	HY	Unknown	6.96185	g/kWh	De-regionalized (Steubing et al 2022)
Ecoinvent	Hydro	HY	Unknown	4.41203	g/kWh	De-regionalized (Steubing et al 2022)
Ecoinvent	Hydro	HY	Unknown	12.3565	g/kWh	De-regionalized (Steubing et al 2022)
Ecoinvent	Hydro	HY	Unknown	6.96185	g/kWh	De-regionalized (Steubing et al 2022)
Ecoinvent	Hydro	HY	Unknown	4.41203	g/kWh	De-regionalized (Steubing et al 2022)
Ecoinvent	Hydro	HY	Unknown	1216.34	g/kWh	De-regionalized (Steubing et al 2022)
Ecoinvent	Hydro	HY	Unknown	6.96185	g/kWh	De-regionalized (Steubing et al 2022)
Ecoinvent	Hydro	HY	Unknown	4.41203	g/kWh	De-regionalized (Steubing et al 2022)
Ecoinvent	Hydro	HY	Unknown	972.113	g/kWh	De-regionalized (Steubing et al 2022)
Ecoinvent	Hydro	HY	Unknown	4.41203	g/kWh	De-regionalized (Steubing et al 2022)
Ecoinvent	Hydro	HY	Unknown	12.3489	g/kWh	De-regionalized (Steubing et al 2022)
Ecoinvent	Hydro	HY	Unknown	4.40444	g/kWh	De-regionalized (Steubing et al 2022)
Ecoinvent	Wind	WI	Unknown	12.5193	g/kWh	De-regionalized (Steubing et al 2022)
Ecoinvent	Wind	WI	Unknown	20.9109	g/kWh	De-regionalized (Steubing et al 2022)
Ecoinvent	Wind	WI	Unknown	13.1308	g/kWh	De-regionalized (Steubing et al 2022)
Ecoinvent	Wind	WI	Unknown	16.6147	g/kWh	De-regionalized (Steubing et al 2022)
Ecoinvent	Wind	WI	Unknown	27.7217	g/kWh	De-regionalized (Steubing et al 2022)
Ecoinvent	Wind	WI	Unknown	17.4242	g/kWh	De-regionalized (Steubing et al 2022)
Ecoinvent	Wind	WI	Unknown	14.8484	g/kWh	De-regionalized (Steubing et al 2022)
Ecoinvent	Wind	WI	Unknown	24.7745	g/kWh	De-regionalized (Steubing et al 2022)
Ecoinvent	Wind	WI	Unknown	15.7107	g/kWh	De-regionalized (Steubing et al 2022)
Ecoinvent	Wind	WI	Unknown	15.5717	g/kWh	De-regionalized (Steubing et al 2022)
Ecoinvent	Wind	WI	Unknown	14.7029	g/kWh	De-regionalized (Steubing et al 2022)
Ecoinvent	Wind	WI	Unknown	24.5583	g/kWh	De-regionalized (Steubing et al 2022)
Ecoinvent	Wind	WI	Unknown	15.4211	g/kWh	De-regionalized (Steubing et al 2022)
Ecoinvent	Wind	WI	Unknown	16.636	g/kWh	De-regionalized (Steubing et al 2022)
Ecoinvent	Wind	WI	Unknown	27.7572	g/kWh	De-regionalized (Steubing et al 2022)
Ecoinvent	Wind	WI	Unknown	17.4465	g/kWh	De-regionalized (Steubing et al 2022)
Ecoinvent	Wind	WI	Unknown	16.2383	g/kWh	De-regionalized (Steubing et al 2022)
Ecoinvent	Wind	WI	Unknown	27.1228	g/kWh	De-regionalized (Steubing et al 2022)
Ecoinvent	Wind	WI	Unknown	17.0315	g/kWh	De-regionalized (Steubing et al 2022)
Ecoinvent	Wind	WI	Unknown	16.2383	g/kWh	De-regionalized (Steubing et al 2022)
Ecoinvent	Wind	WI	Unknown	17.0315	g/kWh	De-regionalized (Steubing et al 2022)
Ecoinvent	Wind	WI	Unknown	16.2383	g/kWh	De-regionalized (Steubing et al 2022)
Ecoinvent	Wind	WI	Unknown	27.1228	g/kWh	De-regionalized (Steubing et al 2022)
Ecoinvent	Wind	WI	Unknown	17.0315	g/kWh	De-regionalized (Steubing et al 2022)
Ecoinvent	Wind	WI	Unknown	16.2383	g/kWh	De-regionalized (Steubing et al 2022)
Ecoinvent	Wind	WI	Unknown	27.1228	g/kWh	De-regionalized (Steubing et al 2022)
Ecoinvent	Wind	WI	Unknown	17.0315	g/kWh	De-regionalized (Steubing et al 2022)
Ecoinvent	Wind	WI	Unknown	16.2383	g/kWh	De-regionalized (Steubing et al 2022)
Ecoinvent	Wind	WI	Unknown	17.0315	g/kWh	De-regionalized (Steubing et al 2022)
Ecoinvent	Wind	WI	Unknown	16.2383	g/kWh	De-regionalized (Steubing et al 2022)
Ecoinvent	Wind	WI	Unknown	27.1228	g/kWh	De-regionalized (Steubing et al 2022)
Ecoinvent	Wind	WI	Unknown	17.0315	g/kWh	De-regionalized (Steubing et al 2022)
Ecoinvent	Wind	WI	Unknown	16.2383	g/kWh	De-regionalized (Steubing et al 2022)
Ecoinvent	Wind	WI	Unknown	17.0315	g/kWh	De-regionalized (Steubing et al 2022)
Ecoinvent	Wind	WI	Unknown	16.2383	g/kWh	De-regionalized (Steubing et al 2022)
Ecoinvent	Wind	WI	Unknown	27.1228	g/kWh	De-regionalized (Steubing et al 2022)
Ecoinvent	Wind	WI	Unknown	17.0315	g/kWh	De-regionalized (Steubing et al 2022)
Ecoinvent	Wind	WI	Unknown	16.2383	g/kWh	De-regionalized (Steubing et al 2022)
Ecoinvent	Wind	WI	Unknown	27.1228	g/kWh	De-regionalized (Steubing et al 2022)
Ecoinvent	Wind	WI	Unknown	17.0315	g/kWh	De-regionalized (Steubing et al 2022)
Ecoinvent	Wind	WI	Unknown	11.0229	g/kWh	De-regionalized (Steubing et al 2022)
Ecoinvent	Wind	WI	Unknown	34.1976	g/kWh	De-regionalized (Steubing et al 2022)
Ecoinvent	Wind	WI	Unknown	13.4336	g/kWh	De-regionalized (Steubing et al 2022)
Ecoinvent	Wind	WI	Unknown	36.0125	g/kWh	De-regionalized (Steubing et al 2022)
Ecoinvent	Wind	WI	Unknown	16.2383	g/kWh	De-regionalized (Steubing et al 2022)
Ecoinvent	Wind	WI	Unknown	27.1228	g/kWh	De-regionalized (Steubing et al 2022)
Ecoinvent	Wind	WI	Unknown	17.0315	g/kWh	De-regionalized (Steubing et al 2022)
Ecoinvent	Wind	WI	Unknown	16.2383	g/kWh	De-regionalized (Steubing et al 2022)
Ecoinvent	Wind	WI	Unknown	27.1228	g/kWh	De-regionalized (Steubing et al 2022)
Ecoinvent	Wind	WI	Unknown	17.0315	g/kWh	De-regionalized (Steubing et al 2022)
Ecoinvent	Wind	WI	Unknown	21.6989	g/kWh	De-regionalized (Steubing et al 2022)
Ecoinvent	Wind	WI	Unknown	36.9525	g/kWh	De-regionalized (Steubing et al 2022)
Ecoinvent	Wind	WI	Unknown	22.7589	g/kWh	De-regionalized (Steubing et al 2022)
Ecoinvent	Wind	WI	Unknown	21.6989	g/kWh	De-regionalized (Steubing et al 2022)
Ecoinvent	Wind	WI	Unknown	36.9525	g/kWh	De-regionalized (Steubing et al 2022)
Ecoinvent	Wind	WI	Unknown	22.7589	g/kWh	De-regionalized (Steubing et al 2022)
Ecoinvent	Wind	WI	Unknown	21.6989	g/kWh	De-regionalized (Steubing et al 2022)
Ecoinvent	Wind	WI	Unknown	36.9525	g/kWh	De-regionalized (Steubing et al 2022)
Ecoinvent	Wind	WI	Unknown	22.7589	g/kWh	De-regionalized (Steubing et al 2022)
Ecoinvent	Wind	WI	Unknown	21.6989	g/kWh	De-regionalized (Steubing et al 2022)
Ecoinvent	Wind	WI	Unknown	36.9525	g/kWh	De-regionalized (Steubing et al 2022)
Ecoinvent	Wind	WI	Unknown	22.7589	g/kWh	De-regionalized (Steubing et al 2022)
Ecoinvent	Wind	WI	Unknown	21.6989	g/kWh	De-regionalized (Steubing et al 2022)
Ecoinvent	Wind	WI	Unknown	36.9525	g/kWh	De-regionalized (Steubing et al 2022)
Ecoinvent	Wind	WI	Unknown	15.6531	g/kWh	De-regionalized (Steubing et al 2022)
Ecoinvent	Wind	WI	Unknown	22.7589	g/kWh	De-regionalized (Steubing et al 2022)
Ecoinvent	Wind	WI	Unknown	21.6989	g/kWh	De-regionalized (Steubing et al 2022)
Ecoinvent	Wind	WI	Unknown	36.9525	g/kWh	De-regionalized (Steubing et al 2022)
Ecoinvent	Wind	WI	Unknown	22.7589	g/kWh	De-regionalized (Steubing et al 2022)
Ecoinvent	Wind	WI	Unknown	21.6989	g/kWh	De-regionalized (Steubing et al 2022)
Ecoinvent	Wind	WI	Unknown	36.9525	g/kWh	De-regionalized (Steubing et al 2022)
Ecoinvent	Wind	WI	Unknown	22.7589	g/kWh	De-regionalized (Steubing et al 2022)
Ecoinvent	Wind	WI	Unknown	21.6989	g/kWh	De-regionalized (Steubing et al 2022)
Ecoinvent	Wind	WI	Unknown	36.9525	g/kWh	De-regionalized (Steubing et al 2022)
Ecoinvent	Wind	WI	Unknown	22.7589	g/kWh	De-regionalized (Steubing et al 2022)
Ecoinvent	Wind	WI	Unknown	21.6989	g/kWh	De-regionalized (Steubing et al 2022)
Ecoinvent	Wind	WI	Unknown	36.9525	g/kWh	De-regionalized (Steubing et al 2022)
Ecoinvent	Wind	WI	Unknown	22.7589	g/kWh	De-regionalized (Steubing et al 2022)
Ecoinvent	Wind	WI	Unknown	21.6989	g/kWh	De-regionalized (Steubing et al 2022)
Ecoinvent	Wind	WI	Unknown	36.9525	g/kWh	De-regionalized (Steubing et al 2022)
Ecoinvent	Wind	WI	Unknown	22.7589	g/kWh	De-regionalized (Steubing et al 2022)
Ecoinvent	Wind	WI	Unknown	21.6989	g/kWh	De-regionalized (Steubing et al 2022)
Ecoinvent	Wind	WI	Unknown	36.9525	g/kWh	De-regionalized (Steubing et al 2022)
Ecoinvent	Wind	WI	Unknown	22.7589	g/kWh	De-regionalized (Steubing et al 2022)
Ecoinvent	Wind	WI	Unknown	21.6989	g/kWh	De-regionalized (Steubing et al 2022)
Ecoinvent	Wind	WI	Unknown	36.9525	g/kWh	De-regionalized (Steubing et al 2022)
Ecoinvent	Wind	WI	Unknown	22.7589	g/kWh	De-regionalized (Steubing et al 2022)
Ecoinvent	Wind	WI	Unknown	21.6989	g/kWh	De-regionalized (Steubing et al 2022)
Ecoinvent	Wind	WI	Unknown	36.9525	g/kWh	De-regionalized (Steubing et al 2022)
Ecoinvent	Wind	WI	Unknown	22.7589	g/kWh	De-regionalized (Steubing et al 2022)
Ecoinvent	Wind	WI	Unknown	21.6989	g/kWh	De-regionalized (Steubing et al 2022)
Ecoinvent	Wind	WI	Unknown	36.9525	g/kWh	De-regionalized (Steubing et al 2022)
Ecoinvent	Wind	WI	Unknown	22.7589	g/kWh	De-regionalized (Steubing et al 2022)
Ecoinvent	Wind	WI	Unknown	21.6989	g/kWh	De-regionalized (Steubing et al 2022)
Ecoinvent	Wind	WI	Unknown	36.9525	g/kWh	De-regionalized (Steubing et al 2022)
Ecoinvent	Wind	WI	Unknown	22.7589	g/kWh	De-regionalized (Steubing et al 2022)
Ecoinvent	Wind	WI	Unknown	21.6989	g/kWh	De-regionalized (Steubing et al 2022)
Ecoinvent	Wind	WI	Unknown	36.9525	g/kWh	De-regionalized (Steubing et al 2022)
Ecoinvent	Wind	WI	Unknown	15.6531	g/kWh	De-regionalized (Steubing et al 2022)
Ecoinvent	Wind	WI	Unknown	22.7589	g/kWh	De-regionalized (Steubing et al 2022)
Ecoinvent	Wind	WI	Unknown	21.6989	g/kWh	De-regionalized (Steubing et al 2022)
Ecoinvent	Wind	WI	Unknown	36.9525	g/kWh	De-regionalized (Steubing et al 2022)
Ecoinvent	Wind	WI	Unknown	22.7589	g/kWh	De-regionalized (Steubing et al 2022)
Ecoinvent	Wind	WI	Unknown	21.6989	g/kWh	De-regionalized (Steubing et al 2022)
Ecoinvent	Wind	WI	Unknown	36.9525	g/kWh	De-regionalized (Steubing et al 2022)
Ecoinvent	Wind	WI	Unknown	15.6531	g/kWh	De-regionalized (Steubing et al 2022)
Ecoinvent	Wind	WI	Unknown	22.7589	g/kWh	De-regionalized (Steubing et al 2022)
Ecoinvent	Wind	WI	Unknown	21.6989	g/kWh	De-regionalized (Steubing et al 2022)
Ecoinvent	Wind	WI	Unknown	36.9525	g/kWh	De-regionalized (Steubing et al 2022)
Ecoinvent	Wind	WI	Unknown	22.7589	g/kWh	De-regionalized (Steubing et al 2022)
Ecoinvent	Wind	WI	Unknown	21.6989	g/kWh	De-regionalized (Steubing et al 2022)
Ecoinvent	Wind	WI	Unknown	36.9525	g/kWh	De-regionalized (Steubing et al 2022)
Ecoinvent	Wind	WI	Unknown	22.7589	g/kWh	De-regionalized (Steubing et al 2022)
Ecoinvent	Wind	WI	Unknown	21.6989	g/kWh	De-regionalized (Steubing et al 2022)
Ecoinvent	Wind	WI	Unknown	36.9525	g/kWh	De-regionalized (Steubing et al 2022)
Ecoinvent	Wind	WI	Unknown	22.7589	g/kWh	De-regionalized (Steubing et al 2022)
Ecoinvent	Wind	WI	Unknown	21.6989	g/kWh	De-regionalized (Steubing et al 2022)
Ecoinvent	Wind	WI	Unknown	36.9525	g/kWh	De-regionalized (Steubing et al 2022)
Ecoinvent	Wind	WI	Unknown	22.7589	g/kWh	De-regionalized (Steubing et al 2022)
Ecoinvent	Wind	WI	Unknown	21.6989	g/kWh	De-regionalized (Steubing et al 2022)
Ecoinvent	Wind	WI	Unknown	36.9525	g/kWh	De-regionalized (Steubing et al 2022)
Ecoinvent	Wind	WI	Unknown	22.7589	g/kWh	De-regionalized (Steubing et al 2022)
Ecoinvent	Wind	WI	Unknown	21.6989	g/kWh	De-regionalized (Steubing et al 2022)
Ecoinvent	Wind	WI	Unknown	36.9525	g/kWh	De-regionalized (Steubing et al 2022)
Ecoinvent	Wind	WI	Unknown	15.6531	g/kWh	De-regionalized (Steubing et al 2022)
Ecoinvent	Wind	WI	Unknown	22.7589	g/kWh	De-regionalized (Steubing et al 2022)
Ecoinvent	Wind	WI	Unknown	21.6989	g/kWh	De-regionalized (Steubing et al 2022)
Ecoinvent	Wind	WI	Unknown	36.9525	g/kWh	De-regionalized (Steubing et al 2022)
Ecoinvent	Wind	WI	Unknown	15.6531	g/kWh	De-regionalized (Steubing et al 2022)
Ecoinvent	Wind	WI	Unknown	22.7589	g/kWh	De-regionalized (Steubing et al 2022)
Ecoinvent	Wind	WI	Unknown	21.6989	g/kWh	De-regionalized (Steubing et al 2022)
Ecoinvent	Wind	WI	Unknown	36.9525	g/kWh	De-regionalized (Steubing et al 2022)
Ecoinvent	Wind	WI	Unknown	22.7589	g/kWh	De-regionalized (Steubing et al 2022)
Ecoinvent	Wind	WI	Unknown	21.6989	g/kWh	De-regionalized (Steubing et al 2022)
Ecoinvent	Wind	WI	Unknown	36.9525	g/kWh	De-regionalized (Steubing et al 2022)
Ecoinvent	Wind	WI	Unknown	22.7589	g/kWh	De-regionalized (Steubing et al 2022)
Ecoinvent	Wind	WI	Unknown	21.6989	g/kWh	De-regionalized (Steubing et al 2022)
Ecoinvent	Wind	WI	Unknown	36.9525	g/kWh	De-regionalized (Steubing et al 2022)
Ecoinvent	Wind	WI	Unknown	22.7589	g/kWh	De-regionalized (Steubing et al 2022)
Ecoinvent	Wind	WI	Unknown	21.6989	g/kWh	De-regionalized (Steubing et al 2022)
Ecoinvent	Wind	WI	Unknown	36.9525	g/kWh	De-regionalized (Steubing et al 2022)
Ecoinvent	Wind	WI	Unknown	22.7589	g/kWh	De-regionalized (Steubing et al 2022)
Ecoinvent	Wind	WI	Unknown	21.6989	g/kWh	De-regionalized (Steubing et al 2022)
Ecoinvent	Wind	WI	Unknown	36.9525	g/kWh	De-regionalized (Steubing et al 2022)
Ecoinvent	Wind	WI	Unknown	22.7589	g/kWh	De-regionalized (Steubing et al 2022)
Ecoinvent	Wind	WI	Unknown	23.5335	g/kWh	De-regionalized (Steubing et al 2022)
Ecoinvent	Wind	WI	Unknown	34.2001	g/kWh	De-regionalized (Steubing et al 2022)
Ecoinvent	Wind	WI	Unknown	24.683	g/kWh	De-regionalized (Steubing et al 2022)
Ecoinvent	Wind	WI	Unknown	18.5605	g/kWh	De-regionalized (Steubing et al 2022)
Ecoinvent	Wind	WI	Unknown	34.2552	g/kWh	De-regionalized (Steubing et al 2022)
Ecoinvent	Wind	WI	Unknown	19.4647	g/kWh	De-regionalized (Steubing et al 2022)
Ecoinvent	Wind	WI	Unknown	12.0348	g/kWh	De-regionalized (Steubing et al 2022)
Ecoinvent	Wind	WI	Unknown	20.0801	g/kWh	De-regionalized (Steubing et al 2022)
Ecoinvent	Wind	WI	Unknown	15.7107	g/kWh	De-regionalized (Steubing et al 2022)
Ecoinvent	Wind	WI	Unknown	12.6211	g/kWh	De-regionalized (Steubing et al 2022)
Ecoinvent	Wind	WI	Unknown	18.4065	g/kWh	De-regionalized (Steubing et al 2022)
Ecoinvent	Wind	WI	Unknown	30.7112	g/kWh	De-regionalized (Steubing et al 2022)
Ecoinvent	Wind	WI	Unknown	15.7107	g/kWh	De-regionalized (Steubing et al 2022)
Ecoinvent	Wind	WI	Unknown	19.3032	g/kWh	De-regionalized (Steubing et al 2022)
Ecoinvent	Wind	WI	Unknown	17.3131	g/kWh	De-regionalized (Steubing et al 2022)
Ecoinvent	Wind	WI	Unknown	28.8869	g/kWh	De-regionalized (Steubing et al 2022)
Ecoinvent	Wind	WI	Unknown	15.7107	g/kWh	De-regionalized (Steubing et al 2022)
Ecoinvent	Wind	WI	Unknown	18.1565	g/kWh	De-regionalized (Steubing et al 2022)
Ecoinvent	Wind	WI	Unknown	14.882	g/kWh	De-regionalized (Steubing et al 2022)
Ecoinvent	Wind	WI	Unknown	24.8307	g/kWh	De-regionalized (Steubing et al 2022)
Ecoinvent	Wind	WI	Unknown	15.7107	g/kWh	De-regionalized (Steubing et al 2022)
Ecoinvent	Wind	WI	Unknown	15.607	g/kWh	De-regionalized (Steubing et al 2022)
Ecoinvent	Wind	WI	Unknown	18.349	g/kWh	De-regionalized (Steubing et al 2022)
Ecoinvent	Wind	WI	Unknown	30.6154	g/kWh	De-regionalized (Steubing et al 2022)
Ecoinvent	Wind	WI	Unknown	15.7107	g/kWh	De-regionalized (Steubing et al 2022)
Ecoinvent	Wind	WI	Unknown	19.2429	g/kWh	De-regionalized (Steubing et al 2022)
Ecoinvent	Wind	WI	Unknown	13.4908	g/kWh	De-regionalized (Steubing et al 2022)
Ecoinvent	Wind	WI	Unknown	22.5094	g/kWh	De-regionalized (Steubing et al 2022)
Ecoinvent	Wind	WI	Unknown	14.148	g/kWh	De-regionalized (Steubing et al 2022)
Ecoinvent	Wind	WI	Unknown	12.6886	g/kWh	De-regionalized (Steubing et al 2022)
Ecoinvent	Wind	WI	Unknown	21.1709	g/kWh	De-regionalized (Steubing et al 2022)
Ecoinvent	Wind	WI	Unknown	13.3068	g/kWh	De-regionalized (Steubing et al 2022)
Ecoinvent	Wind	WI	Unknown	16.2475	g/kWh	De-regionalized (Steubing et al 2022)
Ecoinvent	Wind	WI	Unknown	34.2552	g/kWh	De-regionalized (Steubing et al 2022)
Ecoinvent	Wind	WI	Unknown	17.039	g/kWh	De-regionalized (Steubing et al 2022)
Ecoinvent	Wind	WI	Unknown	19.6516	g/kWh	De-regionalized (Steubing et al 2022)
Ecoinvent	Wind	WI	Unknown	19.6516	g/kWh	De-regionalized (Steubing et al 2022)
Ecoinvent	Wind	WI	Unknown	19.6516	g/kWh	De-regionalized (Steubing et al 2022)
Ecoinvent	Wind	WI	Unknown	19.6516	g/kWh	De-regionalized (Steubing et al 2022)
Ecoinvent	Wind	WI	Unknown	19.6516	g/kWh	De-regionalized (Steubing et al 2022)
Ecoinvent	Wind	WI	Unknown	19.6516	g/kWh	De-regionalized (Steubing et al 2022)
Ecoinvent	Wind	WI	Unknown	19.6516	g/kWh	De-regionalized (Steubing et al 2022)
Ecoinvent	Wind	WI	Unknown	34.1975	g/kWh	De-regionalized (Steubing et al 2022)
Ecoinvent	Wind	WI	Unknown	19.6516	g/kWh	De-regionalized (Steubing et al 2022)
Ecoinvent	Wind	WI	Unknown	12.8711	g/kWh	De-regionalized (Steubing et al 2022)
Ecoinvent	Wind	WI	Unknown	21.4754	g/kWh	De-regionalized (Steubing et al 2022)
Ecoinvent	Wind	WI	Unknown	15.7107	g/kWh	De-regionalized (Steubing et al 2022)
Ecoinvent	Wind	WI	Unknown	13.4981	g/kWh	De-regionalized (Steubing et al 2022)
Ecoinvent	Wind	WI	Unknown	18.0391	g/kWh	De-regionalized (Steubing et al 2022)
Ecoinvent	Wind	WI	Unknown	30.0982	g/kWh	De-regionalized (Steubing et al 2022)
Ecoinvent	Wind	WI	Unknown	18.9179	g/kWh	De-regionalized (Steubing et al 2022)
Ecoinvent	Wind	WI	Unknown	16.0022	g/kWh	De-regionalized (Steubing et al 2022)
Ecoinvent	Wind	WI	Unknown	26.7285	g/kWh	De-regionalized (Steubing et al 2022)
Ecoinvent	Wind	WI	Unknown	15.6531	g/kWh	De-regionalized (Steubing et al 2022)
Ecoinvent	Wind	WI	Unknown	16.7839	g/kWh	De-regionalized (Steubing et al 2022)
Ecoinvent	Wind	WI	Unknown	17.7138	g/kWh	De-regionalized (Steubing et al 2022)
Ecoinvent	Wind	WI	Unknown	34.2552	g/kWh	De-regionalized (Steubing et al 2022)
Ecoinvent	Wind	WI	Unknown	18.5768	g/kWh	De-regionalized (Steubing et al 2022)
Ecoinvent	Wind	WI	Unknown	12.3455	g/kWh	De-regionalized (Steubing et al 2022)
Ecoinvent	Wind	WI	Unknown	20.5985	g/kWh	De-regionalized (Steubing et al 2022)
Ecoinvent	Wind	WI	Unknown	12.947	g/kWh	De-regionalized (Steubing et al 2022)
Ecoinvent	Wind	WI	Unknown	17.818	g/kWh	De-regionalized (Steubing et al 2022)
Ecoinvent	Wind	WI	Unknown	34.2552	g/kWh	De-regionalized (Steubing et al 2022)
Ecoinvent	Wind	WI	Unknown	18.6861	g/kWh	De-regionalized (Steubing et al 2022)
Ecoinvent	Wind	WI	Unknown	10.956	g/kWh	De-regionalized (Steubing et al 2022)
Ecoinvent	Wind	WI	Unknown	18.2998	g/kWh	De-regionalized (Steubing et al 2022)
Ecoinvent	Wind	WI	Unknown	11.4912	g/kWh	De-regionalized (Steubing et al 2022)
Ecoinvent	Wind	WI	Unknown	14.2523	g/kWh	De-regionalized (Steubing et al 2022)
Ecoinvent	Wind	WI	Unknown	23.7799	g/kWh	De-regionalized (Steubing et al 2022)
Ecoinvent	Wind	WI	Unknown	15.7107	g/kWh	De-regionalized (Steubing et al 2022)
Ecoinvent	Wind	WI	Unknown	14.9466	g/kWh	De-regionalized (Steubing et al 2022)
Ecoinvent	Wind	WI	Unknown	13.417	g/kWh	De-regionalized (Steubing et al 2022)
Ecoinvent	Wind	WI	Unknown	22.3862	g/kWh	De-regionalized (Steubing et al 2022)
Ecoinvent	Wind	WI	Unknown	15.7107	g/kWh	De-regionalized (Steubing et al 2022)
Ecoinvent	Wind	WI	Unknown	14.0706	g/kWh	De-regionalized (Steubing et al 2022)
Ecoinvent	Wind	WI	Unknown	15.621	g/kWh	De-regionalized (Steubing et al 2022)
Ecoinvent	Wind	WI	Unknown	26.0636	g/kWh	De-regionalized (Steubing et al 2022)
Ecoinvent	Wind	WI	Unknown	15.7107	g/kWh	De-regionalized (Steubing et al 2022)
Ecoinvent	Wind	WI	Unknown	16.382	g/kWh	De-regionalized (Steubing et al 2022)
Ecoinvent	Wind	WI	Unknown	13.0985	g/kWh	De-regionalized (Steubing et al 2022)
Ecoinvent	Wind	WI	Unknown	34.2552	g/kWh	De-regionalized (Steubing et al 2022)
Ecoinvent	Wind	WI	Unknown	15.7107	g/kWh	De-regionalized (Steubing et al 2022)
Ecoinvent	Wind	WI	Unknown	13.7366	g/kWh	De-regionalized (Steubing et al 2022)
Ecoinvent	Wind	WI	Unknown	21.4289	g/kWh	De-regionalized (Steubing et al 2022)
Ecoinvent	Wind	WI	Unknown	35.7541	g/kWh	De-regionalized (Steubing et al 2022)
Ecoinvent	Wind	WI	Unknown	22.4728	g/kWh	De-regionalized (Steubing et al 2022)
Ecoinvent	Wind	WI	Unknown	99.513	g/kWh	De-regionalized (Steubing et al 2022)
Ecoinvent	Wind	WI	Unknown	34.2001	g/kWh	De-regionalized (Steubing et al 2022)
Ecoinvent	Wind	WI	Unknown	104.374	g/kWh	De-regionalized (Steubing et al 2022)
Ecoinvent	Wind	WI	Unknown	14.8484	g/kWh	De-regionalized (Steubing et al 2022)
Ecoinvent	Wind	WI	Unknown	34.2552	g/kWh	De-regionalized (Steubing et al 2022)
Ecoinvent	Wind	WI	Unknown	15.5717	g/kWh	De-regionalized (Steubing et al 2022)
Ecoinvent	Wind	WI	Unknown	28.7831	g/kWh	De-regionalized (Steubing et al 2022)
Ecoinvent	Wind	WI	Unknown	48.0764	g/kWh	De-regionalized (Steubing et al 2022)
Ecoinvent	Wind	WI	Unknown	30.1891	g/kWh	De-regionalized (Steubing et al 2022)
Ecoinvent	Wind	WI	Unknown	15.5869	g/kWh	De-regionalized (Steubing et al 2022)
Ecoinvent	Wind	WI	Unknown	26.0347	g/kWh	De-regionalized (Steubing et al 2022)
Ecoinvent	Wind	WI	Unknown	15.6531	g/kWh	De-regionalized (Steubing et al 2022)
Ecoinvent	Wind	WI	Unknown	16.3482	g/kWh	De-regionalized (Steubing et al 2022)
Ecoinvent	Wind	WI	Unknown	13.6838	g/kWh	De-regionalized (Steubing et al 2022)
Ecoinvent	Wind	WI	Unknown	22.8315	g/kWh	De-regionalized (Steubing et al 2022)
Ecoinvent	Wind	WI	Unknown	15.7107	g/kWh	De-regionalized (Steubing et al 2022)
Ecoinvent	Wind	WI	Unknown	14.3505	g/kWh	De-regionalized (Steubing et al 2022)
Ecoinvent	Wind	WI	Unknown	15.5219	g/kWh	De-regionalized (Steubing et al 2022)
Ecoinvent	Wind	WI	Unknown	25.8983	g/kWh	De-regionalized (Steubing et al 2022)
Ecoinvent	Wind	WI	Unknown	15.7107	g/kWh	De-regionalized (Steubing et al 2022)
Ecoinvent	Wind	WI	Unknown	16.2781	g/kWh	De-regionalized (Steubing et al 2022)
Ecoinvent	Wind	WI	Unknown	17.4477	g/kWh	De-regionalized (Steubing et al 2022)
Ecoinvent	Wind	WI	Unknown	34.2733	g/kWh	De-regionalized (Steubing et al 2022)
Ecoinvent	Wind	WI	Unknown	18.2969	g/kWh	De-regionalized (Steubing et al 2022)
Ecoinvent	Wind	WI	Unknown	11.6851	g/kWh	De-regionalized (Steubing et al 2022)
Ecoinvent	Wind	WI	Unknown	19.5175	g/kWh	De-regionalized (Steubing et al 2022)
Ecoinvent	Wind	WI	Unknown	12.2558	g/kWh	De-regionalized (Steubing et al 2022)
Ecoinvent	Wind	WI	Unknown	12.8058	g/kWh	De-regionalized (Steubing et al 2022)
Ecoinvent	Wind	WI	Unknown	21.3665	g/kWh	De-regionalized (Steubing et al 2022)
Ecoinvent	Wind	WI	Unknown	15.7107	g/kWh	De-regionalized (Steubing et al 2022)
Ecoinvent	Wind	WI	Unknown	13.4297	g/kWh	De-regionalized (Steubing et al 2022)
Ecoinvent	Wind	WI	Unknown	12.3715	g/kWh	De-regionalized (Steubing et al 2022)
Ecoinvent	Wind	WI	Unknown	20.6641	g/kWh	De-regionalized (Steubing et al 2022)
Ecoinvent	Wind	WI	Unknown	12.9758	g/kWh	De-regionalized (Steubing et al 2022)
Ecoinvent	Wind	WI	Unknown	12.3715	g/kWh	De-regionalized (Steubing et al 2022)
Ecoinvent	Wind	WI	Unknown	20.6641	g/kWh	De-regionalized (Steubing et al 2022)
Ecoinvent	Wind	WI	Unknown	12.9758	g/kWh	De-regionalized (Steubing et al 2022)
Ecoinvent	Wind	WI	Unknown	12.3715	g/kWh	De-regionalized (Steubing et al 2022)
Ecoinvent	Wind	WI	Unknown	20.6641	g/kWh	De-regionalized (Steubing et al 2022)
Ecoinvent	Wind	WI	Unknown	12.9758	g/kWh	De-regionalized (Steubing et al 2022)
Ecoinvent	Wind	WI	Unknown	12.3715	g/kWh	De-regionalized (Steubing et al 2022)
Ecoinvent	Wind	WI	Unknown	20.6641	g/kWh	De-regionalized (Steubing et al 2022)
Ecoinvent	Wind	WI	Unknown	12.9758	g/kWh	De-regionalized (Steubing et al 2022)
Ecoinvent	Wind	WI	Unknown	12.3715	g/kWh	De-regionalized (Steubing et al 2022)
Ecoinvent	Wind	WI	Unknown	20.6641	g/kWh	De-regionalized (Steubing et al 2022)
Ecoinvent	Wind	WI	Unknown	12.9758	g/kWh	De-regionalized (Steubing et al 2022)
Ecoinvent	Wind	WI	Unknown	12.3715	g/kWh	De-regionalized (Steubing et al 2022)
Ecoinvent	Wind	WI	Unknown	20.6641	g/kWh	De-regionalized (Steubing et al 2022)
Ecoinvent	Wind	WI	Unknown	12.9758	g/kWh	De-regionalized (Steubing et al 2022)
Ecoinvent	Wind	WI	Unknown	12.3715	g/kWh	De-regionalized (Steubing et al 2022)
Ecoinvent	Wind	WI	Unknown	20.6641	g/kWh	De-regionalized (Steubing et al 2022)
Ecoinvent	Wind	WI	Unknown	12.9758	g/kWh	De-regionalized (Steubing et al 2022)
Ecoinvent	Wind	WI	Unknown	12.3715	g/kWh	De-regionalized (Steubing et al 2022)
Ecoinvent	Wind	WI	Unknown	20.6641	g/kWh	De-regionalized (Steubing et al 2022)
Ecoinvent	Wind	WI	Unknown	12.9758	g/kWh	De-regionalized (Steubing et al 2022)
Ecoinvent	Wind	WI	Unknown	12.3715	g/kWh	De-regionalized (Steubing et al 2022)
Ecoinvent	Wind	WI	Unknown	20.6641	g/kWh	De-regionalized (Steubing et al 2022)
Ecoinvent	Wind	WI	Unknown	12.9758	g/kWh	De-regionalized (Steubing et al 2022)
Ecoinvent	Wind	WI	Unknown	16.6774	g/kWh	De-regionalized (Steubing et al 2022)
Ecoinvent	Wind	WI	Unknown	13.7585	g/kWh	De-regionalized (Steubing et al 2022)
Ecoinvent	Wind	WI	Unknown	22.9808	g/kWh	De-regionalized (Steubing et al 2022)
Ecoinvent	Wind	WI	Unknown	14.4306	g/kWh	De-regionalized (Steubing et al 2022)
Ecoinvent	Wind	WI	Unknown	20.7319	g/kWh	De-regionalized (Steubing et al 2022)
Ecoinvent	Wind	WI	Unknown	34.6285	g/kWh	De-regionalized (Steubing et al 2022)
Ecoinvent	Wind	WI	Unknown	21.7446	g/kWh	De-regionalized (Steubing et al 2022)
Ecoinvent	Wind	WI	Unknown	16.722	g/kWh	De-regionalized (Steubing et al 2022)
Ecoinvent	Wind	WI	Unknown	28.4594	g/kWh	De-regionalized (Steubing et al 2022)
Ecoinvent	Wind	WI	Unknown	47.4845	g/kWh	De-regionalized (Steubing et al 2022)
Ecoinvent	Wind	WI	Unknown	29.8458	g/kWh	De-regionalized (Steubing et al 2022)
Ecoinvent	Wind	WI	Unknown	14.3077	g/kWh	De-regionalized (Steubing et al 2022)
Ecoinvent	Wind	WI	Unknown	23.8982	g/kWh	De-regionalized (Steubing et al 2022)
Ecoinvent	Wind	WI	Unknown	15.0066	g/kWh	De-regionalized (Steubing et al 2022)
Ecoinvent	Oil	OI	Unknown	1307.58	g/kWh	De-regionalized (Steubing et al 2022)
Ecoinvent	Oil	OI	Unknown	877.024	g/kWh	De-regionalized (Steubing et al 2022)
Ecoinvent	Oil	OI	Unknown	1155.1	g/kWh	De-regionalized (Steubing et al 2022)
Ecoinvent	Oil	OI	Unknown	958.679	g/kWh	De-regionalized (Steubing et al 2022)
Ecoinvent	Oil	OI	Unknown	913.253	g/kWh	De-regionalized (Steubing et al 2022)
Ecoinvent	Oil	OI	Unknown	853.907	g/kWh	De-regionalized (Steubing et al 2022)
Ecoinvent	Oil	OI	Unknown	1062.91	g/kWh	De-regionalized (Steubing et al 2022)
Ecoinvent	Oil	OI	Unknown	727.145	g/kWh	De-regionalized (Steubing et al 2022)
Ecoinvent	Oil	OI	Unknown	782.718	g/kWh	De-regionalized (Steubing et al 2022)
Ecoinvent	Oil	OI	Unknown	1668.43	g/kWh	De-regionalized (Steubing et al 2022)
Ecoinvent	Oil	OI	Unknown	964.38	g/kWh	De-regionalized (Steubing et al 2022)
Ecoinvent	Oil	OI	Unknown	1097.07	g/kWh	De-regionalized (Steubing et al 2022)
Ecoinvent	Oil	OI	Unknown	1097.07	g/kWh	De-regionalized (Steubing et al 2022)
Ecoinvent	Oil	OI	Unknown	1097.07	g/kWh	De-regionalized (Steubing et al 2022)
Ecoinvent	Oil	OI	Unknown	1097.07	g/kWh	De-regionalized (Steubing et al 2022)
Ecoinvent	Oil	OI	Unknown	1097.07	g/kWh	De-regionalized (Steubing et al 2022)
Ecoinvent	Oil	OI	Unknown	1097.07	g/kWh	De-regionalized (Steubing et al 2022)
Ecoinvent	Oil	OI	Unknown	1097.07	g/kWh	De-regionalized (Steubing et al 2022)
Ecoinvent	Oil	OI	Unknown	1097.07	g/kWh	De-regionalized (Steubing et al 2022)
Ecoinvent	Oil	OI	Unknown	1097.07	g/kWh	De-regionalized (Steubing et al 2022)
Ecoinvent	Oil	OI	Unknown	1097.07	g/kWh	De-regionalized (Steubing et al 2022)
Ecoinvent	Oil	OI	Unknown	1097.08	g/kWh	De-regionalized (Steubing et al 2022)
Ecoinvent	Oil	OI	Unknown	1097.07	g/kWh	De-regionalized (Steubing et al 2022)
Ecoinvent	Oil	OI	Unknown	1097.07	g/kWh	De-regionalized (Steubing et al 2022)
Ecoinvent	Oil	OI	Unknown	908.598	g/kWh	De-regionalized (Steubing et al 2022)
Ecoinvent	Oil	OI	Unknown	851.81	g/kWh	De-regionalized (Steubing et al 2022)
Ecoinvent	Oil	OI	Unknown	1221.91	g/kWh	De-regionalized (Steubing et al 2022)
Ecoinvent	Oil	OI	Unknown	957.711	g/kWh	De-regionalized (Steubing et al 2022)
Ecoinvent	Oil	OI	Unknown	957.711	g/kWh	De-regionalized (Steubing et al 2022)
Ecoinvent	Oil	OI	Unknown	1073.8	g/kWh	De-regionalized (Steubing et al 2022)
Ecoinvent	Oil	OI	Unknown	1073.8	g/kWh	De-regionalized (Steubing et al 2022)
Ecoinvent	Oil	OI	Unknown	1073.8	g/kWh	De-regionalized (Steubing et al 2022)
Ecoinvent	Oil	OI	Unknown	1042.22	g/kWh	De-regionalized (Steubing et al 2022)
Ecoinvent	Oil	OI	Unknown	1143.07	g/kWh	De-regionalized (Steubing et al 2022)
Ecoinvent	Oil	OI	Unknown	1107.35	g/kWh	De-regionalized (Steubing et al 2022)
Ecoinvent	Oil	OI	Unknown	1362.9	g/kWh	De-regionalized (Steubing et al 2022)
Ecoinvent	Oil	OI	Unknown	1073.8	g/kWh	De-regionalized (Steubing et al 2022)
Ecoinvent	Oil	OI	Unknown	1042.22	g/kWh	De-regionalized (Steubing et al 2022)
Ecoinvent	Oil	OI	Unknown	1417.41	g/kWh	De-regionalized (Steubing et al 2022)
Ecoinvent	Oil	OI	Unknown	932.508	g/kWh	De-regionalized (Steubing et al 2022)
Ecoinvent	Oil	OI	Unknown	1042.22	g/kWh	De-regionalized (Steubing et al 2022)
Ecoinvent	Oil	OI	Unknown	1221.91	g/kWh	De-regionalized (Steubing et al 2022)
Ecoinvent	Oil	OI	Unknown	1540.67	g/kWh	De-regionalized (Steubing et al 2022)
Ecoinvent	Oil	OI	Unknown	1181.18	g/kWh	De-regionalized (Steubing et al 2022)
Ecoinvent	Oil	OI	Unknown	1181.18	g/kWh	De-regionalized (Steubing et al 2022)
Ecoinvent	Oil	OI	Unknown	1012.44	g/kWh	De-regionalized (Steubing et al 2022)
Ecoinvent	Oil	OI	Unknown	1143.07	g/kWh	De-regionalized (Steubing et al 2022)
Ecoinvent	Oil	OI	Unknown	1073.8	g/kWh	De-regionalized (Steubing et al 2022)
Ecoinvent	Oil	OI	Unknown	885.883	g/kWh	De-regionalized (Steubing et al 2022)
Ecoinvent	Oil	OI	Unknown	1181.18	g/kWh	De-regionalized (Steubing et al 2022)
Ecoinvent	Oil	OI	Unknown	1042.22	g/kWh	De-regionalized (Steubing et al 2022)
Ecoinvent	Oil	OI	Unknown	1107.35	g/kWh	De-regionalized (Steubing et al 2022)
Ecoinvent	Oil	OI	Unknown	1086.97	g/kWh	De-regionalized (Steubing et al 2022)
Ecoinvent	Oil	OI	Unknown	1540.67	g/kWh	De-regionalized (Steubing et al 2022)
Ecoinvent	Oil	OI	Unknown	885.883	g/kWh	De-regionalized (Steubing et al 2022)
Ecoinvent	Oil	OI	Unknown	1070.55	g/kWh	De-regionalized (Steubing et al 2022)
Ecoinvent	Oil	OI	Unknown	1064.6	g/kWh	De-regionalized (Steubing et al 2022)
Ecoinvent	Oil	OI	Unknown	1522.37	g/kWh	De-regionalized (Steubing et al 2022)
Ecoinvent	Oil	OI	Unknown	1240.61	g/kWh	De-regionalized (Steubing et al 2022)
Ecoinvent	Oil	OI	Unknown	965.12	g/kWh	De-regionalized (Steubing et al 2022)
Ecoinvent	Oil	OI	Unknown	1183.81	g/kWh	De-regionalized (Steubing et al 2022)
Ecoinvent	Oil	OI	Unknown	873.295	g/kWh	De-regionalized (Steubing et al 2022)
Ecoinvent	Oil	OI	Unknown	446.809	g/kWh	De-regionalized (Steubing et al 2022)
Ecoinvent	Oil	OI	Unknown	951.493	g/kWh	De-regionalized (Steubing et al 2022)
Ecoinvent	Oil	OI	Unknown	953.137	g/kWh	De-regionalized (Steubing et al 2022)
Ecoinvent	Oil	OI	Unknown	769.637	g/kWh	De-regionalized (Steubing et al 2022)
Ecoinvent	Oil	OI	Unknown	1264.15	g/kWh	De-regionalized (Steubing et al 2022)
Ecoinvent	Oil	OI	Unknown	876.781	g/kWh	De-regionalized (Steubing et al 2022)
Ecoinvent	Oil	OI	Unknown	679.917	g/kWh	De-regionalized (Steubing et al 2022)
Ecoinvent	Oil	OI	Unknown	992.485	g/kWh	De-regionalized (Steubing et al 2022)
Ecoinvent	Oil	OI	Unknown	1075.3	g/kWh	De-regionalized (Steubing et al 2022)
Ecoinvent	Oil	OI	Unknown	1130.65	g/kWh	De-regionalized (Steubing et al 2022)
Ecoinvent	Oil	OI	Unknown	873.295	g/kWh	De-regionalized (Steubing et al 2022)
Ecoinvent	Oil	OI	Unknown	960.024	g/kWh	De-regionalized (Steubing et al 2022)
Ecoinvent	Oil	OI	Unknown	814.536	g/kWh	De-regionalized (Steubing et al 2022)
Ecoinvent	Oil	OI	Unknown	730.014	g/kWh	De-regionalized (Steubing et al 2022)
Ecoinvent	Oil	OI	Unknown	693.948	g/kWh	De-regionalized (Steubing et al 2022)
Ecoinvent	Oil	OI	Unknown	765.364	g/kWh	De-regionalized (Steubing et al 2022)
Ecoinvent	Oil	OI	Unknown	1247.72	g/kWh	De-regionalized (Steubing et al 2022)
Ecoinvent	Oil	OI	Unknown	919.115	g/kWh	De-regionalized (Steubing et al 2022)
Ecoinvent	Oil	OI	Unknown	750.861	g/kWh	De-regionalized (Steubing et al 2022)
Ecoinvent	Oil	OI	Unknown	1058.21	g/kWh	De-regionalized (Steubing et al 2022)
Ecoinvent	Oil	OI	Unknown	904.029	g/kWh	De-regionalized (Steubing et al 2022)
Ecoinvent	Oil	OI	Unknown	828.601	g/kWh	De-regionalized (Steubing et al 2022)
Ecoinvent	Oil	OI	Unknown	2756.06	g/kWh	De-regionalized (Steubing et al 2022)
Ecoinvent	Oil	OI	Unknown	1529.19	g/kWh	De-regionalized (Steubing et al 2022)
Ecoinvent	Oil	OI	Unknown	2756.06	g/kWh	De-regionalized (Steubing et al 2022)
Ecoinvent	Oil	OI	Unknown	1529.19	g/kWh	De-regionalized (Steubing et al 2022)
Ecoinvent	Oil	OI	Unknown	858.334	g/kWh	De-regionalized (Steubing et al 2022)
Ecoinvent	Oil	OI	Unknown	628.672	g/kWh	De-regionalized (Steubing et al 2022)
Ecoinvent	Oil	OI	Unknown	1220.68	g/kWh	De-regionalized (Steubing et al 2022)
Ecoinvent	Oil	OI	Unknown	995.374	g/kWh	De-regionalized (Steubing et al 2022)
Ecoinvent	Oil	OI	Unknown	795.938	g/kWh	De-regionalized (Steubing et al 2022)
Ecoinvent	Oil	OI	Unknown	1076.05	g/kWh	De-regionalized (Steubing et al 2022)
Ecoinvent	Oil	OI	Unknown	485.359	g/kWh	De-regionalized (Steubing et al 2022)
Ecoinvent	Oil	OI	Unknown	858.334	g/kWh	De-regionalized (Steubing et al 2022)
Ecoinvent	Oil	OI	Unknown	880.144	g/kWh	De-regionalized (Steubing et al 2022)
Ecoinvent	Oil	OI	Unknown	833.606	g/kWh	De-regionalized (Steubing et al 2022)
Ecoinvent	Oil	OI	Unknown	610.223	g/kWh	De-regionalized (Steubing et al 2022)
Ecoinvent	Oil	OI	Unknown	999.364	g/kWh	De-regionalized (Steubing et al 2022)
Ecoinvent	Oil	OI	Unknown	1257.23	g/kWh	De-regionalized (Steubing et al 2022)
Ecoinvent	Oil	OI	Unknown	1687.4	g/kWh	De-regionalized (Steubing et al 2022)
Ecoinvent	Oil	OI	Unknown	1155.69	g/kWh	De-regionalized (Steubing et al 2022)
Ecoinvent	Oil	OI	Unknown	960.315	g/kWh	De-regionalized (Steubing et al 2022)
Ecoinvent	Oil	OI	Unknown	1396.54	g/kWh	De-regionalized (Steubing et al 2022)
Ecoinvent	Oil	OI	Unknown	1386.67	g/kWh	De-regionalized (Steubing et al 2022)
Ecoinvent	Oil	OI	Unknown	873.295	g/kWh	De-regionalized (Steubing et al 2022)
Ecoinvent	Oil	OI	Unknown	1097.07	g/kWh	De-regionalized (Steubing et al 2022)
Ecoinvent	Oil	OI	Unknown	1051.49	g/kWh	De-regionalized (Steubing et al 2022)
Ecoinvent	Oil	OI	Unknown	1420.5	g/kWh	De-regionalized (Steubing et al 2022)
Ecoinvent	Oil	OI	Unknown	866.144	g/kWh	De-regionalized (Steubing et al 2022)
Ecoinvent	Oil	OI	Unknown	599.515	g/kWh	De-regionalized (Steubing et al 2022)
Ecoinvent	Oil	OI	Unknown	854.188	g/kWh	De-regionalized (Steubing et al 2022)
Ecoinvent	Oil	OI	Unknown	836.88	g/kWh	De-regionalized (Steubing et al 2022)
Ecoinvent	Oil	OI	Unknown	694.819	g/kWh	De-regionalized (Steubing et al 2022)
Ecoinvent	Oil	OI	Unknown	131.367	g/kWh	De-regionalized (Steubing et al 2022)
Ecoinvent	Oil	OI	Unknown	947.468	g/kWh	De-regionalized (Steubing et al 2022)
Ecoinvent	Oil	OI	Unknown	1063.15	g/kWh	De-regionalized (Steubing et al 2022)
Ecoinvent	Oil	OI	Unknown	1322.28	g/kWh	De-regionalized (Steubing et al 2022)
Ecoinvent	Oil	OI	Unknown	650.87	g/kWh	De-regionalized (Steubing et al 2022)
Ecoinvent	Oil	OI	Unknown	862.173	g/kWh	De-regionalized (Steubing et al 2022)
Ecoinvent	Oil	OI	Unknown	644.776	g/kWh	De-regionalized (Steubing et al 2022)
Ecoinvent	Oil	OI	Unknown	1060.94	g/kWh	De-regionalized (Steubing et al 2022)
Ecoinvent	Oil	OI	Unknown	913.255	g/kWh	De-regionalized (Steubing et al 2022)
Ecoinvent	Oil	OI	Unknown	960.307	g/kWh	De-regionalized (Steubing et al 2022)
Ecoinvent	Oil	OI	Unknown	684.759	g/kWh	De-regionalized (Steubing et al 2022)
Ecoinvent	Oil	OI	Unknown	1312.42	g/kWh	De-regionalized (Steubing et al 2022)
Ecoinvent	Oil	OI	Unknown	841.788	g/kWh	De-regionalized (Steubing et al 2022)
Ecoinvent	Oil	OI	Unknown	1221.91	g/kWh	De-regionalized (Steubing et al 2022)
Ecoinvent	Oil	OI	Unknown	757.857	g/kWh	De-regionalized (Steubing et al 2022)
Ecoinvent	Oil	OI	Unknown	1265.55	g/kWh	De-regionalized (Steubing et al 2022)
Ecoinvent	Oil	OI	Unknown	729.871	g/kWh	De-regionalized (Steubing et al 2022)
Ecoinvent	Oil	OI	Unknown	1064.12	g/kWh	De-regionalized (Steubing et al 2022)
Ecoinvent	Oil	OI	Unknown	926.711	g/kWh	De-regionalized (Steubing et al 2022)
Ecoinvent	Oil	OI	Unknown	1789.66	g/kWh	De-regionalized (Steubing et al 2022)
Ecoinvent	Oil	OI	Unknown	760.702	g/kWh	De-regionalized (Steubing et al 2022)
Ecoinvent	Oil	OI	Unknown	1139.4	g/kWh	De-regionalized (Steubing et al 2022)
Ecoinvent	Oil	OI	Unknown	1000.72	g/kWh	De-regionalized (Steubing et al 2022)
Ecoinvent	Oil	OI	Unknown	1925.83	g/kWh	De-regionalized (Steubing et al 2022)
Ecoinvent	Oil	OI	Unknown	751.11	g/kWh	De-regionalized (Steubing et al 2022)
Ecoinvent	Oil	OI	Unknown	1021.19	g/kWh	De-regionalized (Steubing et al 2022)
Ecoinvent	Oil	OI	Unknown	957.711	g/kWh	De-regionalized (Steubing et al 2022)
Ecoinvent	Oil	OI	Unknown	952.562	g/kWh	De-regionalized (Steubing et al 2022)
Ecoinvent	Oil	OI	Unknown	1357.67	g/kWh	De-regionalized (Steubing et al 2022)
Ecoinvent	Oil	OI	Unknown	1288.56	g/kWh	De-regionalized (Steubing et al 2022)
Ecoinvent	Oil	OI	Unknown	1102.42	g/kWh	De-regionalized (Steubing et al 2022)
Ecoinvent	Oil	OI	Unknown	1175.92	g/kWh	De-regionalized (Steubing et al 2022)
Ecoinvent	Oil	OI	Unknown	1017.03	g/kWh	De-regionalized (Steubing et al 2022)
Ecoinvent	Oil	OI	Unknown	886.072	g/kWh	De-regionalized (Steubing et al 2022)
Ecoinvent	Oil	OI	Unknown	1378.03	g/kWh	De-regionalized (Steubing et al 2022)
Ecoinvent	Oil	OI	Unknown	1147.64	g/kWh	De-regionalized (Steubing et al 2022)
Ecoinvent	Oil	OI	Unknown	1464.27	g/kWh	De-regionalized (Steubing et al 2022)
Ecoinvent	Oil	OI	Unknown	1270.08	g/kWh	De-regionalized (Steubing et al 2022)
Ecoinvent	Oil	OI	Unknown	1185.13	g/kWh	De-regionalized (Steubing et al 2022)
Ecoinvent	Oil	OI	Unknown	181.563	g/kWh	De-regionalized (Steubing et al 2022)
Ecoinvent	Biomass and waste	BW	Unknown	171.873	g/kWh	De-regionalized (Steubing et al 2022)
Ecoinvent	Biomass and waste	BW	Unknown	46.5625	g/kWh	De-regionalized (Steubing et al 2022)
Ecoinvent	Biomass and waste	BW	Unknown	0	g/kWh	De-regionalized (Steubing et al 2022)
Ecoinvent	Biomass and waste	BW	Unknown	172.109	g/kWh	De-regionalized (Steubing et al 2022)
Ecoinvent	Biomass and waste	BW	Unknown	49.0498	g/kWh	De-regionalized (Steubing et al 2022)
Ecoinvent	Biomass and waste	BW	Unknown	0	g/kWh	De-regionalized (Steubing et al 2022)
Ecoinvent	Biomass and waste	BW	Unknown	172.109	g/kWh	De-regionalized (Steubing et al 2022)
Ecoinvent	Biomass and waste	BW	Unknown	49.0498	g/kWh	De-regionalized (Steubing et al 2022)
Ecoinvent	Biomass and waste	BW	Unknown	84.3963	g/kWh	De-regionalized (Steubing et al 2022)
Ecoinvent	Biomass and waste	BW	Unknown	220.482	g/kWh	De-regionalized (Steubing et al 2022)
Ecoinvent	Biomass and waste	BW	Unknown	171.873	g/kWh	De-regionalized (Steubing et al 2022)
Ecoinvent	Biomass and waste	BW	Unknown	46.5625	g/kWh	De-regionalized (Steubing et al 2022)
Ecoinvent	Biomass and waste	BW	Unknown	410.91	g/kWh	De-regionalized (Steubing et al 2022)
Ecoinvent	Biomass and waste	BW	Unknown	4.72223	g/kWh	De-regionalized (Steubing et al 2022)
Ecoinvent	Biomass and waste	BW	Unknown	171.873	g/kWh	De-regionalized (Steubing et al 2022)
Ecoinvent	Biomass and waste	BW	Unknown	46.5625	g/kWh	De-regionalized (Steubing et al 2022)
Ecoinvent	Biomass and waste	BW	Unknown	46.5625	g/kWh	De-regionalized (Steubing et al 2022)
Ecoinvent	Biomass and waste	BW	Unknown	4.72223	g/kWh	De-regionalized (Steubing et al 2022)
Ecoinvent	Biomass and waste	BW	Unknown	171.873	g/kWh	De-regionalized (Steubing et al 2022)
Ecoinvent	Biomass and waste	BW	Unknown	4.72223	g/kWh	De-regionalized (Steubing et al 2022)
Ecoinvent	Biomass and waste	BW	Unknown	171.873	g/kWh	De-regionalized (Steubing et al 2022)
Ecoinvent	Biomass and waste	BW	Unknown	46.5625	g/kWh	De-regionalized (Steubing et al 2022)
Ecoinvent	Biomass and waste	BW	Unknown	4.72223	g/kWh	De-regionalized (Steubing et al 2022)
Ecoinvent	Biomass and waste	BW	Unknown	171.873	g/kWh	De-regionalized (Steubing et al 2022)
Ecoinvent	Biomass and waste	BW	Unknown	46.5625	g/kWh	De-regionalized (Steubing et al 2022)
Ecoinvent	Biomass and waste	BW	Unknown	4.72223	g/kWh	De-regionalized (Steubing et al 2022)
Ecoinvent	Biomass and waste	BW	Unknown	171.873	g/kWh	De-regionalized (Steubing et al 2022)
Ecoinvent	Biomass and waste	BW	Unknown	46.5625	g/kWh	De-regionalized (Steubing et al 2022)
Ecoinvent	Biomass and waste	BW	Unknown	171.873	g/kWh	De-regionalized (Steubing et al 2022)
Ecoinvent	Biomass and waste	BW	Unknown	63.8728	g/kWh	De-regionalized (Steubing et al 2022)
Ecoinvent	Biomass and waste	BW	Unknown	174.821	g/kWh	De-regionalized (Steubing et al 2022)
Ecoinvent	Biomass and waste	BW	Unknown	46.5625	g/kWh	De-regionalized (Steubing et al 2022)
Ecoinvent	Biomass and waste	BW	Unknown	46.5625	g/kWh	De-regionalized (Steubing et al 2022)
Ecoinvent	Biomass and waste	BW	Unknown	0	g/kWh	De-regionalized (Steubing et al 2022)
Ecoinvent	Biomass and waste	BW	Unknown	172.109	g/kWh	De-regionalized (Steubing et al 2022)
Ecoinvent	Biomass and waste	BW	Unknown	49.0498	g/kWh	De-regionalized (Steubing et al 2022)
Ecoinvent	Biomass and waste	BW	Unknown	0	g/kWh	De-regionalized (Steubing et al 2022)
Ecoinvent	Biomass and waste	BW	Unknown	172.109	g/kWh	De-regionalized (Steubing et al 2022)
Ecoinvent	Biomass and waste	BW	Unknown	49.0498	g/kWh	De-regionalized (Steubing et al 2022)
Ecoinvent	Biomass and waste	BW	Unknown	172.109	g/kWh	De-regionalized (Steubing et al 2022)
Ecoinvent	Biomass and waste	BW	Unknown	48.1228	g/kWh	De-regionalized (Steubing et al 2022)
Ecoinvent	Biomass and waste	BW	Unknown	49.0498	g/kWh	De-regionalized (Steubing et al 2022)
Ecoinvent	Biomass and waste	BW	Unknown	0	g/kWh	De-regionalized (Steubing et al 2022)
Ecoinvent	Biomass and waste	BW	Unknown	172.109	g/kWh	De-regionalized (Steubing et al 2022)
Ecoinvent	Biomass and waste	BW	Unknown	49.0498	g/kWh	De-regionalized (Steubing et al 2022)
Ecoinvent	Biomass and waste	BW	Unknown	0	g/kWh	De-regionalized (Steubing et al 2022)
Ecoinvent	Biomass and waste	BW	Unknown	172.109	g/kWh	De-regionalized (Steubing et al 2022)
Ecoinvent	Biomass and waste	BW	Unknown	49.0498	g/kWh	De-regionalized (Steubing et al 2022)
Ecoinvent	Biomass and waste	BW	Unknown	0	g/kWh	De-regionalized (Steubing et al 2022)
Ecoinvent	Biomass and waste	BW	Unknown	172.109	g/kWh	De-regionalized (Steubing et al 2022)
Ecoinvent	Biomass and waste	BW	Unknown	49.0498	g/kWh	De-regionalized (Steubing et al 2022)
Ecoinvent	Biomass and waste	BW	Unknown	0	g/kWh	De-regionalized (Steubing et al 2022)
Ecoinvent	Biomass and waste	BW	Unknown	172.109	g/kWh	De-regionalized (Steubing et al 2022)
Ecoinvent	Biomass and waste	BW	Unknown	49.0498	g/kWh	De-regionalized (Steubing et al 2022)
Ecoinvent	Biomass and waste	BW	Unknown	172.109	g/kWh	De-regionalized (Steubing et al 2022)
Ecoinvent	Biomass and waste	BW	Unknown	48.1228	g/kWh	De-regionalized (Steubing et al 2022)
Ecoinvent	Biomass and waste	BW	Unknown	49.0498	g/kWh	De-regionalized (Steubing et al 2022)
Ecoinvent	Biomass and waste	BW	Unknown	46.5625	g/kWh	De-regionalized (Steubing et al 2022)
Ecoinvent	Biomass and waste	BW	Unknown	4.72223	g/kWh	De-regionalized (Steubing et al 2022)
Ecoinvent	Biomass and waste	BW	Unknown	171.873	g/kWh	De-regionalized (Steubing et al 2022)
Ecoinvent	Biomass and waste	BW	Unknown	45.6355	g/kWh	De-regionalized (Steubing et al 2022)
Ecoinvent	Biomass and waste	BW	Unknown	4.72223	g/kWh	De-regionalized (Steubing et al 2022)
Ecoinvent	Biomass and waste	BW	Unknown	172.109	g/kWh	De-regionalized (Steubing et al 2022)
Ecoinvent	Biomass and waste	BW	Unknown	49.0498	g/kWh	De-regionalized (Steubing et al 2022)
Ecoinvent	Biomass and waste	BW	Unknown	0	g/kWh	De-regionalized (Steubing et al 2022)
Ecoinvent	Biomass and waste	BW	Unknown	172.109	g/kWh	De-regionalized (Steubing et al 2022)
Ecoinvent	Biomass and waste	BW	Unknown	49.0498	g/kWh	De-regionalized (Steubing et al 2022)
Ecoinvent	Biomass and waste	BW	Unknown	0	g/kWh	De-regionalized (Steubing et al 2022)
Ecoinvent	Biomass and waste	BW	Unknown	46.5625	g/kWh	De-regionalized (Steubing et al 2022)
Ecoinvent	Biomass and waste	BW	Unknown	172.109	g/kWh	De-regionalized (Steubing et al 2022)
Ecoinvent	Biomass and waste	BW	Unknown	48.1228	g/kWh	De-regionalized (Steubing et al 2022)
Ecoinvent	Biomass and waste	BW	Unknown	49.0498	g/kWh	De-regionalized (Steubing et al 2022)
Ecoinvent	Biomass and waste	BW	Unknown	172.109	g/kWh	De-regionalized (Steubing et al 2022)
Ecoinvent	Biomass and waste	BW	Unknown	48.1228	g/kWh	De-regionalized (Steubing et al 2022)
Ecoinvent	Biomass and waste	BW	Unknown	171.873	g/kWh	De-regionalized (Steubing et al 2022)
Ecoinvent	Biomass and waste	BW	Unknown	45.6355	g/kWh	De-regionalized (Steubing et al 2022)
Ecoinvent	Biomass and waste	BW	Unknown	0	g/kWh	De-regionalized (Steubing et al 2022)
Ecoinvent	Biomass and waste	BW	Unknown	172.109	g/kWh	De-regionalized (Steubing et al 2022)
Ecoinvent	Biomass and waste	BW	Unknown	49.0498	g/kWh	De-regionalized (Steubing et al 2022)
Ecoinvent	Biomass and waste	BW	Unknown	0	g/kWh	De-regionalized (Steubing et al 2022)
Ecoinvent	Biomass and waste	BW	Unknown	172.109	g/kWh	De-regionalized (Steubing et al 2022)
Ecoinvent	Biomass and waste	BW	Unknown	49.0498	g/kWh	De-regionalized (Steubing et al 2022)
Ecoinvent	Biomass and waste	BW	Unknown	0	g/kWh	De-regionalized (Steubing et al 2022)
Ecoinvent	Biomass and waste	BW	Unknown	172.109	g/kWh	De-regionalized (Steubing et al 2022)
Ecoinvent	Biomass and waste	BW	Unknown	49.0498	g/kWh	De-regionalized (Steubing et al 2022)
Ecoinvent	Biomass and waste	BW	Unknown	0	g/kWh	De-regionalized (Steubing et al 2022)
Ecoinvent	Biomass and waste	BW	Unknown	172.109	g/kWh	De-regionalized (Steubing et al 2022)
Ecoinvent	Biomass and waste	BW	Unknown	49.0498	g/kWh	De-regionalized (Steubing et al 2022)
Ecoinvent	Biomass and waste	BW	Unknown	172.109	g/kWh	De-regionalized (Steubing et al 2022)
Ecoinvent	Biomass and waste	BW	Unknown	49.0498	g/kWh	De-regionalized (Steubing et al 2022)
Ecoinvent	Biomass and waste	BW	Unknown	0	g/kWh	De-regionalized (Steubing et al 2022)
Ecoinvent	Biomass and waste	BW	Unknown	45.6355	g/kWh	De-regionalized (Steubing et al 2022)
Ecoinvent	Biomass and waste	BW	Unknown	46.5625	g/kWh	De-regionalized (Steubing et al 2022)
Ecoinvent	Biomass and waste	BW	Unknown	0	g/kWh	De-regionalized (Steubing et al 2022)
Ecoinvent	Biomass and waste	BW	Unknown	172.109	g/kWh	De-regionalized (Steubing et al 2022)
Ecoinvent	Biomass and waste	BW	Unknown	49.0498	g/kWh	De-regionalized (Steubing et al 2022)
Ecoinvent	Biomass and waste	BW	Unknown	4.72223	g/kWh	De-regionalized (Steubing et al 2022)
Ecoinvent	Biomass and waste	BW	Unknown	172.109	g/kWh	De-regionalized (Steubing et al 2022)
Ecoinvent	Biomass and waste	BW	Unknown	49.0498	g/kWh	De-regionalized (Steubing et al 2022)
Ecoinvent	Biomass and waste	BW	Unknown	45.6355	g/kWh	De-regionalized (Steubing et al 2022)
Ecoinvent	Biomass and waste	BW	Unknown	46.5625	g/kWh	De-regionalized (Steubing et al 2022)
Ecoinvent	Biomass and waste	BW	Unknown	0	g/kWh	De-regionalized (Steubing et al 2022)
Ecoinvent	Biomass and waste	BW	Unknown	171.873	g/kWh	De-regionalized (Steubing et al 2022)
Ecoinvent	Biomass and waste	BW	Unknown	46.5625	g/kWh	De-regionalized (Steubing et al 2022)
Ecoinvent	Biomass and waste	BW	Unknown	0	g/kWh	De-regionalized (Steubing et al 2022)
Ecoinvent	Biomass and waste	BW	Unknown	172.109	g/kWh	De-regionalized (Steubing et al 2022)
Ecoinvent	Biomass and waste	BW	Unknown	49.0498	g/kWh	De-regionalized (Steubing et al 2022)
Ecoinvent	Biomass and waste	BW	Unknown	0	g/kWh	De-regionalized (Steubing et al 2022)
Ecoinvent	Biomass and waste	BW	Unknown	156.687	g/kWh	De-regionalized (Steubing et al 2022)
Ecoinvent	Biomass and waste	BW	Unknown	172.109	g/kWh	De-regionalized (Steubing et al 2022)
Ecoinvent	Biomass and waste	BW	Unknown	49.0498	g/kWh	De-regionalized (Steubing et al 2022)
Ecoinvent	Biomass and waste	BW	Unknown	450.334	g/kWh	De-regionalized (Steubing et al 2022)
Ecoinvent	Biomass and waste	BW	Unknown	422.235	g/kWh	De-regionalized (Steubing et al 2022)
Ecoinvent	Biomass and waste	BW	Unknown	362.432	g/kWh	De-regionalized (Steubing et al 2022)
Ecoinvent	Biomass and waste	BW	Unknown	323.082	g/kWh	De-regionalized (Steubing et al 2022)
Ecoinvent	Biomass and waste	BW	Unknown	3.86142	g/kWh	De-regionalized (Steubing et al 2022)
Ecoinvent	Biomass and waste	BW	Unknown	148.403	g/kWh	De-regionalized (Steubing et al 2022)
Ecoinvent	Biomass and waste	BW	Unknown	172.185	g/kWh	De-regionalized (Steubing et al 2022)
Ecoinvent	Biomass and waste	BW	Unknown	56.011	g/kWh	De-regionalized (Steubing et al 2022)
Ecoinvent	Biomass and waste	BW	Unknown	55.9193	g/kWh	De-regionalized (Steubing et al 2022)
Ecoinvent	Biomass and waste	BW	Unknown	44.3391	g/kWh	De-regionalized (Steubing et al 2022)
Ecoinvent	Biomass and waste	BW	Unknown	45.2661	g/kWh	De-regionalized (Steubing et al 2022)
Ecoinvent	Biomass and waste	BW	Unknown	807.469	g/kWh	De-regionalized (Steubing et al 2022)
Ecoinvent	Biomass and waste	BW	Unknown	114.144	g/kWh	De-regionalized (Steubing et al 2022)
Ecoinvent	Biomass and waste	BW	Unknown	0	g/kWh	De-regionalized (Steubing et al 2022)
Ecoinvent	Biomass and waste	BW	Unknown	171.873	g/kWh	De-regionalized (Steubing et al 2022)
Ecoinvent	Biomass and waste	BW	Unknown	45.6355	g/kWh	De-regionalized (Steubing et al 2022)
Ecoinvent	Biomass and waste	BW	Unknown	0	g/kWh	De-regionalized (Steubing et al 2022)
Ecoinvent	Biomass and waste	BW	Unknown	172.109	g/kWh	De-regionalized (Steubing et al 2022)
Ecoinvent	Biomass and waste	BW	Unknown	49.0498	g/kWh	De-regionalized (Steubing et al 2022)
Ecoinvent	Biomass and waste	BW	Unknown	46.5625	g/kWh	De-regionalized (Steubing et al 2022)
Ecoinvent	Biomass and waste	BW	Unknown	171.873	g/kWh	De-regionalized (Steubing et al 2022)
Ecoinvent	Biomass and waste	BW	Unknown	46.5625	g/kWh	De-regionalized (Steubing et al 2022)
Ecoinvent	Biomass and waste	BW	Unknown	171.873	g/kWh	De-regionalized (Steubing et al 2022)
Ecoinvent	Biomass and waste	BW	Unknown	46.5625	g/kWh	De-regionalized (Steubing et al 2022)
Ecoinvent	Biomass and waste	BW	Unknown	171.873	g/kWh	De-regionalized (Steubing et al 2022)
Ecoinvent	Biomass and waste	BW	Unknown	46.5625	g/kWh	De-regionalized (Steubing et al 2022)
Ecoinvent	Biomass and waste	BW	Unknown	171.873	g/kWh	De-regionalized (Steubing et al 2022)
Ecoinvent	Biomass and waste	BW	Unknown	46.5625	g/kWh	De-regionalized (Steubing et al 2022)
Ecoinvent	Biomass and waste	BW	Unknown	171.873	g/kWh	De-regionalized (Steubing et al 2022)
Ecoinvent	Biomass and waste	BW	Unknown	46.5625	g/kWh	De-regionalized (Steubing et al 2022)
Ecoinvent	Biomass and waste	BW	Unknown	171.873	g/kWh	De-regionalized (Steubing et al 2022)
Ecoinvent	Biomass and waste	BW	Unknown	46.5625	g/kWh	De-regionalized (Steubing et al 2022)
Ecoinvent	Biomass and waste	BW	Unknown	171.873	g/kWh	De-regionalized (Steubing et al 2022)
Ecoinvent	Biomass and waste	BW	Unknown	46.5625	g/kWh	De-regionalized (Steubing et al 2022)
Ecoinvent	Biomass and waste	BW	Unknown	171.873	g/kWh	De-regionalized (Steubing et al 2022)
Ecoinvent	Biomass and waste	BW	Unknown	46.5625	g/kWh	De-regionalized (Steubing et al 2022)
Ecoinvent	Biomass and waste	BW	Unknown	171.873	g/kWh	De-regionalized (Steubing et al 2022)
Ecoinvent	Biomass and waste	BW	Unknown	46.5625	g/kWh	De-regionalized (Steubing et al 2022)
Ecoinvent	Biomass and waste	BW	Unknown	4.72223	g/kWh	De-regionalized (Steubing et al 2022)
Ecoinvent	Biomass and waste	BW	Unknown	171.873	g/kWh	De-regionalized (Steubing et al 2022)
Ecoinvent	Biomass and waste	BW	Unknown	45.6355	g/kWh	De-regionalized (Steubing et al 2022)
Ecoinvent	Biomass and waste	BW	Unknown	171.873	g/kWh	De-regionalized (Steubing et al 2022)
Ecoinvent	Biomass and waste	BW	Unknown	45.6355	g/kWh	De-regionalized (Steubing et al 2022)
Ecoinvent	Biomass and waste	BW	Unknown	171.873	g/kWh	De-regionalized (Steubing et al 2022)
Ecoinvent	Biomass and waste	BW	Unknown	45.6355	g/kWh	De-regionalized (Steubing et al 2022)
Ecoinvent	Biomass and waste	BW	Unknown	46.5625	g/kWh	De-regionalized (Steubing et al 2022)
Ecoinvent	Biomass and waste	BW	Unknown	171.873	g/kWh	De-regionalized (Steubing et al 2022)
Ecoinvent	Biomass and waste	BW	Unknown	45.6355	g/kWh	De-regionalized (Steubing et al 2022)
Ecoinvent	Biomass and waste	BW	Unknown	4.72223	g/kWh	De-regionalized (Steubing et al 2022)
Ecoinvent	Biomass and waste	BW	Unknown	4.72223	g/kWh	De-regionalized (Steubing et al 2022)
Ecoinvent	Biomass and waste	BW	Unknown	172.109	g/kWh	De-regionalized (Steubing et al 2022)
Ecoinvent	Biomass and waste	BW	Unknown	48.1228	g/kWh	De-regionalized (Steubing et al 2022)
Ecoinvent	Biomass and waste	BW	Unknown	45.6355	g/kWh	De-regionalized (Steubing et al 2022)
Ecoinvent	Biomass and waste	BW	Unknown	33.189	g/kWh	De-regionalized (Steubing et al 2022)
Ecoinvent	Biomass and waste	BW	Unknown	29.9009	g/kWh	De-regionalized (Steubing et al 2022)
Ecoinvent	Biomass and waste	BW	Unknown	48.3507	g/kWh	De-regionalized (Steubing et al 2022)
Ecoinvent	Biomass and waste	BW	Unknown	109.505	g/kWh	De-regionalized (Steubing et al 2022)
Ecoinvent	Biomass and waste	BW	Unknown	109.753	g/kWh	De-regionalized (Steubing et al 2022)
Ecoinvent	Solar	PV	Unknown	63.225	g/kWh	De-regionalized (Steubing et al 2022)
Ecoinvent	Solar	PV	Unknown	74.9009	g/kWh	De-regionalized (Steubing et al 2022)
Ecoinvent	Solar	PV	Unknown	66.6625	g/kWh	De-regionalized (Steubing et al 2022)
Ecoinvent	Solar	PV	Unknown	97.1662	g/kWh	De-regionalized (Steubing et al 2022)
Ecoinvent	Solar	PV	Unknown	115.111	g/kWh	De-regionalized (Steubing et al 2022)
Ecoinvent	Solar	PV	Unknown	102.451	g/kWh	De-regionalized (Steubing et al 2022)
Ecoinvent	Solar	PV	Unknown	111.432	g/kWh	De-regionalized (Steubing et al 2022)
Ecoinvent	Solar	PV	Unknown	131.989	g/kWh	De-regionalized (Steubing et al 2022)
Ecoinvent	Solar	PV	Unknown	85.0984	g/kWh	De-regionalized (Steubing et al 2022)
Ecoinvent	Solar	PV	Unknown	70.8741	g/kWh	De-regionalized (Steubing et al 2022)
Ecoinvent	Solar	PV	Unknown	83.963	g/kWh	De-regionalized (Steubing et al 2022)
Ecoinvent	Solar	PV	Unknown	80.8649	g/kWh	De-regionalized (Steubing et al 2022)
Ecoinvent	Solar	PV	Unknown	90.8344	g/kWh	De-regionalized (Steubing et al 2022)
Ecoinvent	Solar	PV	Unknown	80.8435	g/kWh	De-regionalized (Steubing et al 2022)
Ecoinvent	Solar	PV	Unknown	80.8649	g/kWh	De-regionalized (Steubing et al 2022)
Ecoinvent	Solar	PV	Unknown	90.8344	g/kWh	De-regionalized (Steubing et al 2022)
Ecoinvent	Solar	PV	Unknown	80.8435	g/kWh	De-regionalized (Steubing et al 2022)
Ecoinvent	Solar	PV	Unknown	80.8649	g/kWh	De-regionalized (Steubing et al 2022)
Ecoinvent	Solar	PV	Unknown	90.8344	g/kWh	De-regionalized (Steubing et al 2022)
Ecoinvent	Solar	PV	Unknown	80.8435	g/kWh	De-regionalized (Steubing et al 2022)
Ecoinvent	Solar	PV	Unknown	80.8649	g/kWh	De-regionalized (Steubing et al 2022)
Ecoinvent	Solar	PV	Unknown	90.8344	g/kWh	De-regionalized (Steubing et al 2022)
Ecoinvent	Solar	PV	Unknown	80.8435	g/kWh	De-regionalized (Steubing et al 2022)
Ecoinvent	Solar	PV	Unknown	80.8649	g/kWh	De-regionalized (Steubing et al 2022)
Ecoinvent	Solar	PV	Unknown	90.8344	g/kWh	De-regionalized (Steubing et al 2022)
Ecoinvent	Solar	PV	Unknown	80.8435	g/kWh	De-regionalized (Steubing et al 2022)
Ecoinvent	Solar	PV	Unknown	80.8649	g/kWh	De-regionalized (Steubing et al 2022)
Ecoinvent	Solar	PV	Unknown	90.8344	g/kWh	De-regionalized (Steubing et al 2022)
Ecoinvent	Solar	PV	Unknown	80.8435	g/kWh	De-regionalized (Steubing et al 2022)
Ecoinvent	Solar	PV	Unknown	80.8649	g/kWh	De-regionalized (Steubing et al 2022)
Ecoinvent	Solar	PV	Unknown	90.8344	g/kWh	De-regionalized (Steubing et al 2022)
Ecoinvent	Solar	PV	Unknown	80.8435	g/kWh	De-regionalized (Steubing et al 2022)
Ecoinvent	Solar	PV	Unknown	80.8649	g/kWh	De-regionalized (Steubing et al 2022)
Ecoinvent	Solar	PV	Unknown	87.4172	g/kWh	De-regionalized (Steubing et al 2022)
Ecoinvent	Solar	PV	Unknown	80.8435	g/kWh	De-regionalized (Steubing et al 2022)
Ecoinvent	Solar	PV	Unknown	80.8649	g/kWh	De-regionalized (Steubing et al 2022)
Ecoinvent	Solar	PV	Unknown	90.8344	g/kWh	De-regionalized (Steubing et al 2022)
Ecoinvent	Solar	PV	Unknown	80.8435	g/kWh	De-regionalized (Steubing et al 2022)
Ecoinvent	Solar	PV	Unknown	80.8623	g/kWh	De-regionalized (Steubing et al 2022)
Ecoinvent	Solar	PV	Unknown	90.8319	g/kWh	De-regionalized (Steubing et al 2022)
Ecoinvent	Solar	PV	Unknown	80.8435	g/kWh	De-regionalized (Steubing et al 2022)
Ecoinvent	Solar	PV	Unknown	80.8649	g/kWh	De-regionalized (Steubing et al 2022)
Ecoinvent	Solar	PV	Unknown	90.8344	g/kWh	De-regionalized (Steubing et al 2022)
Ecoinvent	Solar	PV	Unknown	80.8435	g/kWh	De-regionalized (Steubing et al 2022)
Ecoinvent	Solar	PV	Unknown	80.8649	g/kWh	De-regionalized (Steubing et al 2022)
Ecoinvent	Solar	PV	Unknown	90.8344	g/kWh	De-regionalized (Steubing et al 2022)
Ecoinvent	Solar	PV	Unknown	80.8435	g/kWh	De-regionalized (Steubing et al 2022)
Ecoinvent	Solar	PV	Unknown	81.0982	g/kWh	De-regionalized (Steubing et al 2022)
Ecoinvent	Solar	PV	Unknown	96.0748	g/kWh	De-regionalized (Steubing et al 2022)
Ecoinvent	Solar	PV	Unknown	80.8649	g/kWh	De-regionalized (Steubing et al 2022)
Ecoinvent	Solar	PV	Unknown	95.7985	g/kWh	De-regionalized (Steubing et al 2022)
Ecoinvent	Solar	PV	Unknown	85.0984	g/kWh	De-regionalized (Steubing et al 2022)
Ecoinvent	Solar	PV	Unknown	80.8649	g/kWh	De-regionalized (Steubing et al 2022)
Ecoinvent	Solar	PV	Unknown	95.7985	g/kWh	De-regionalized (Steubing et al 2022)
Ecoinvent	Solar	PV	Unknown	85.0984	g/kWh	De-regionalized (Steubing et al 2022)
Ecoinvent	Solar	PV	Unknown	101.029	g/kWh	De-regionalized (Steubing et al 2022)
Ecoinvent	Solar	PV	Unknown	81.0982	g/kWh	De-regionalized (Steubing et al 2022)
Ecoinvent	Solar	PV	Unknown	96.0748	g/kWh	De-regionalized (Steubing et al 2022)
Ecoinvent	Solar	PV	Unknown	85.0984	g/kWh	De-regionalized (Steubing et al 2022)
Ecoinvent	Solar	PV	Unknown	65.8923	g/kWh	De-regionalized (Steubing et al 2022)
Ecoinvent	Solar	PV	Unknown	78.0608	g/kWh	De-regionalized (Steubing et al 2022)
Ecoinvent	Solar	PV	Unknown	85.0984	g/kWh	De-regionalized (Steubing et al 2022)
Ecoinvent	Solar	PV	Unknown	80.8649	g/kWh	De-regionalized (Steubing et al 2022)
Ecoinvent	Solar	PV	Unknown	95.7985	g/kWh	De-regionalized (Steubing et al 2022)
Ecoinvent	Solar	PV	Unknown	85.0984	g/kWh	De-regionalized (Steubing et al 2022)
Ecoinvent	Solar	PV	Unknown	83.5071	g/kWh	De-regionalized (Steubing et al 2022)
Ecoinvent	Solar	PV	Unknown	98.9285	g/kWh	De-regionalized (Steubing et al 2022)
Ecoinvent	Solar	PV	Unknown	85.0984	g/kWh	De-regionalized (Steubing et al 2022)
Ecoinvent	Solar	PV	Unknown	80.8649	g/kWh	De-regionalized (Steubing et al 2022)
Ecoinvent	Solar	PV	Unknown	95.7985	g/kWh	De-regionalized (Steubing et al 2022)
Ecoinvent	Solar	PV	Unknown	85.0984	g/kWh	De-regionalized (Steubing et al 2022)
Ecoinvent	Solar	PV	Unknown	80.8649	g/kWh	De-regionalized (Steubing et al 2022)
Ecoinvent	Solar	PV	Unknown	95.7985	g/kWh	De-regionalized (Steubing et al 2022)
Ecoinvent	Solar	PV	Unknown	85.0984	g/kWh	De-regionalized (Steubing et al 2022)
Ecoinvent	Solar	PV	Unknown	80.8649	g/kWh	De-regionalized (Steubing et al 2022)
Ecoinvent	Solar	PV	Unknown	95.7985	g/kWh	De-regionalized (Steubing et al 2022)
Ecoinvent	Solar	PV	Unknown	85.0984	g/kWh	De-regionalized (Steubing et al 2022)
Ecoinvent	Solar	PV	Unknown	80.8649	g/kWh	De-regionalized (Steubing et al 2022)
Ecoinvent	Solar	PV	Unknown	95.7985	g/kWh	De-regionalized (Steubing et al 2022)
Ecoinvent	Solar	PV	Unknown	85.0984	g/kWh	De-regionalized (Steubing et al 2022)
Ecoinvent	Solar	PV	Unknown	84.5112	g/kWh	De-regionalized (Steubing et al 2022)
Ecoinvent	Solar	PV	Unknown	100.118	g/kWh	De-regionalized (Steubing et al 2022)
Ecoinvent	Solar	PV	Unknown	80.8649	g/kWh	De-regionalized (Steubing et al 2022)
Ecoinvent	Solar	PV	Unknown	95.7985	g/kWh	De-regionalized (Steubing et al 2022)
Ecoinvent	Solar	PV	Unknown	85.0984	g/kWh	De-regionalized (Steubing et al 2022)
Ecoinvent	Solar	PV	Unknown	78.8244	g/kWh	De-regionalized (Steubing et al 2022)
Ecoinvent	Solar	PV	Unknown	93.3811	g/kWh	De-regionalized (Steubing et al 2022)
Ecoinvent	Solar	PV	Unknown	85.0984	g/kWh	De-regionalized (Steubing et al 2022)
Ecoinvent	Solar	PV	Unknown	85.1941	g/kWh	De-regionalized (Steubing et al 2022)
Ecoinvent	Solar	PV	Unknown	100.927	g/kWh	De-regionalized (Steubing et al 2022)
Ecoinvent	Solar	PV	Unknown	80.8649	g/kWh	De-regionalized (Steubing et al 2022)
Ecoinvent	Solar	PV	Unknown	90.917	g/kWh	De-regionalized (Steubing et al 2022)
Ecoinvent	Solar	PV	Unknown	85.0984	g/kWh	De-regionalized (Steubing et al 2022)
Ecoinvent	Solar	PV	Unknown	61.1175	g/kWh	De-regionalized (Steubing et al 2022)
Ecoinvent	Solar	PV	Unknown	72.4042	g/kWh	De-regionalized (Steubing et al 2022)
Ecoinvent	Solar	PV	Unknown	85.0984	g/kWh	De-regionalized (Steubing et al 2022)
Ecoinvent	Solar	PV	Unknown	59.8171	g/kWh	De-regionalized (Steubing et al 2022)
Ecoinvent	Solar	PV	Unknown	70.8637	g/kWh	De-regionalized (Steubing et al 2022)
Ecoinvent	Solar	PV	Unknown	85.0984	g/kWh	De-regionalized (Steubing et al 2022)
Ecoinvent	Solar	PV	Unknown	57.7686	g/kWh	De-regionalized (Steubing et al 2022)
Ecoinvent	Solar	PV	Unknown	68.4369	g/kWh	De-regionalized (Steubing et al 2022)
Ecoinvent	Solar	PV	Unknown	85.0984	g/kWh	De-regionalized (Steubing et al 2022)
Ecoinvent	Solar	PV	Unknown	77.3781	g/kWh	De-regionalized (Steubing et al 2022)
Ecoinvent	Solar	PV	Unknown	91.6677	g/kWh	De-regionalized (Steubing et al 2022)
Ecoinvent	Solar	PV	Unknown	85.0984	g/kWh	De-regionalized (Steubing et al 2022)
Ecoinvent	Solar	PV	Unknown	80.8649	g/kWh	De-regionalized (Steubing et al 2022)
Ecoinvent	Solar	PV	Unknown	95.7985	g/kWh	De-regionalized (Steubing et al 2022)
Ecoinvent	Solar	PV	Unknown	85.0984	g/kWh	De-regionalized (Steubing et al 2022)
Ecoinvent	Solar	PV	Unknown	70.8757	g/kWh	De-regionalized (Steubing et al 2022)
Ecoinvent	Solar	PV	Unknown	83.9645	g/kWh	De-regionalized (Steubing et al 2022)
Ecoinvent	Solar	PV	Unknown	85.0984	g/kWh	De-regionalized (Steubing et al 2022)
Ecoinvent	Solar	PV	Unknown	80.8649	g/kWh	De-regionalized (Steubing et al 2022)
Ecoinvent	Solar	PV	Unknown	94.2621	g/kWh	De-regionalized (Steubing et al 2022)
Ecoinvent	Solar	PV	Unknown	65.3815	g/kWh	De-regionalized (Steubing et al 2022)
Ecoinvent	Solar	PV	Unknown	77.4557	g/kWh	De-regionalized (Steubing et al 2022)
Ecoinvent	Solar	PV	Unknown	80.8649	g/kWh	De-regionalized (Steubing et al 2022)
Ecoinvent	Solar	PV	Unknown	95.7985	g/kWh	De-regionalized (Steubing et al 2022)
Ecoinvent	Solar	PV	Unknown	85.0984	g/kWh	De-regionalized (Steubing et al 2022)
Ecoinvent	Solar	PV	Unknown	65.3815	g/kWh	De-regionalized (Steubing et al 2022)
Ecoinvent	Solar	PV	Unknown	77.4557	g/kWh	De-regionalized (Steubing et al 2022)
Ecoinvent	Solar	PV	Unknown	85.0984	g/kWh	De-regionalized (Steubing et al 2022)
Ecoinvent	Solar	PV	Unknown	50.2037	g/kWh	De-regionalized (Steubing et al 2022)
Ecoinvent	Solar	PV	Unknown	59.4749	g/kWh	De-regionalized (Steubing et al 2022)
Ecoinvent	Solar	PV	Unknown	85.0984	g/kWh	De-regionalized (Steubing et al 2022)
Ecoinvent	Solar	PV	Unknown	68.0179	g/kWh	De-regionalized (Steubing et al 2022)
Ecoinvent	Solar	PV	Unknown	80.5789	g/kWh	De-regionalized (Steubing et al 2022)
Ecoinvent	Solar	PV	Unknown	85.0984	g/kWh	De-regionalized (Steubing et al 2022)
Ecoinvent	Solar	PV	Unknown	84.766	g/kWh	De-regionalized (Steubing et al 2022)
[truncated: 229 more rows]

## Sheet: Stat analysis CF by tech
Technology	Source	n	Lower whisker (g/kWh)	Q1 (g/kWh)	Median (g/kWh)	Q3 (g/kWh)	Upper whisker (g/kWh)	IQR (g/kWh)	Mean (g/kWh)	Std Dev (g/kWh)	CV%
Biomass and waste	EXIO Hybrid	23	22.5517	35.5157	51.282	154.214	306.945	118.698	110.045	109.894	0.998628
Biomass and waste	Ecoinvent	169	0	45.6355	49.0498	171.873	323.082	126.238	95.1965	101.935	1.07079
Biomass and waste	Electricity Maps	28	230	230	230	230	230	0	231.994	10.553	0.0454882
Biomass and waste	IPCC	3	130	180	230	560	890	380	416.667	412.957	0.991096
Coal	EXIO Hybrid	23	1174.36	1346.16	1651.72	1752.99	2103.59	406.823	1602.61	256.675	0.16016
Coal	Ecoinvent	161	926.377	1166.94	1269.03	1496.99	1926.11	330.05	1353.02	256.628	0.18967
Coal	Electricity Maps	28	983.04	1074.53	1097.31	1174.78	1291.95	100.258	1094.25	141.583	0.129388
Coal	IPCC	3	740	780	820	865	910	85	823.333	85.049	0.103298
Coal	NREL	3	930	955	980	1015	1050	60	986.667	60.2771	0.0610917
Geothermal	EXIO Hybrid	5	10.6781	13.5642	58.0824	85.4663	94.7948	71.9021	52.5171	39.2806	0.747958
Geothermal	Ecoinvent	17	81.7095	81.7095	81.7095	81.7095	81.7095	0	81.7095	0	0
Geothermal	Electricity Maps	28	38	38	38	38	38	0	40.5314	13.395	0.330485
Geothermal	IPCC	3	6	22	38	58.5	79	36.5	41	36.5923	0.892496
Hydro	EXIO Hybrid	26	1.37772	12.6807	26.6058	54.8355	98.5003	42.1548	40.8368	42.9153	1.0509
Hydro	Ecoinvent	251	3.95689	4.40444	6.95427	88.1275	176.977	83.7231	291.858	568.351	1.94735
Hydro	Electricity Maps	28	10.7	10.7	10.7	10.7	10.7	0	11.175	2.51346	0.224918
Hydro	IPCC	3	1	12.5	24	1112	2200	1099.5	741.667	1263.01	1.70293
Natural Gas	EXIO Hybrid	26	730.508	852.03	988.089	1336.93	2043.28	484.896	1318.11	935.843	0.709988
Natural Gas	Ecoinvent	321	209.319	498.575	598.831	707.266	990.849	208.692	612.566	157.642	0.257347
Natural Gas	Electricity Maps	28	484.25	508.842	529.295	530.39	561.99	21.5475	529.025	52.659	0.0995397
Natural Gas	IPCC	3	410	450	490	570	650	120	516.667	122.202	0.23652
Natural Gas	NREL	3	427	456.5	486	522	558	65.5	490.333	65.6074	0.133802
Nec	EXIO Hybrid	6	53.5515	89.889	218.628	296.082	352.688	206.193	202.062	128.716	0.637011
Nuclear	EXIO Hybrid	14	3.73533	12.2706	23.2792	44.4666	84.582	32.196	29.7967	22.55	0.756796
Nuclear	Ecoinvent	67	10.1025	11.0512	11.379	11.8362	12.6127	0.78504	15.8707	29.9881	1.88952
Nuclear	Electricity Maps	28	5.13	5.13	5.13	5.13	5.13	0	5.37536	1.29831	0.24153
Nuclear	IPCC	3	3.7	7.85	12	61	110	53.15	41.9	59.1222	1.41103
Nuclear	NREL	3	10	11.5	13	26	39	14.5	20.6667	15.9478	0.771669
Oil	EXIO Hybrid	28	1209.84	1604.44	1775.24	1896.93	1943.35	292.49	1841.11	391.279	0.212524
Oil	Ecoinvent	155	446.809	875.038	1058.21	1165.8	1540.67	290.764	1055.3	328.179	0.310981
Oil	Electricity Maps	28	617.49	885.08	885.08	1121.04	1169.95	235.955	960.971	143.166	0.148981
Solar	EXIO Hybrid	24	4.1116	25.4582	48.4479	73.8021	99.1202	48.344	57.8193	56.4822	0.976875
Solar	Ecoinvent	260	49.9431	74.4166	80.8649	90.8344	115.111	16.4178	83.2023	16.4533	0.197751
Solar	Electricity Maps	28	25.6	28.7083	33.6667	36.55	45	7.84167	33.543	6.13702	0.18296
Solar	IPCC	6	8.8	20.25	37.5	59.25	63	39	57.4667	63.2281	1.10026
Solar	NREL	6	14	29	33.5	41	50	12	33.6667	12.4686	0.370355
Tide and wave	EXIO Hybrid	3	64.014	94.1139	124.214	277.224	430.235	183.111	206.154	196.38	0.952588
Tide and wave	IPCC	3	5.6	11.3	17	22.5	28	11.2	16.8667	11.2006	0.664067
Wind	EXIO Hybrid	26	2.58466	13.0377	22.6017	41.6965	71.4709	28.6588	39.3603	45.7481	1.16229
Wind	Ecoinvent	303	10.956	15.7107	20.6641	23.6567	34.6285	7.94597	22.1707	10.0722	0.454301
Wind	Electricity Maps	28	12.62	12.62	12.62	12.62	12.62	0	12.5621	0.306151	0.0243709
Wind	IPCC	3	7	9	11	33.5	56	24.5	24.6667	27.2091	1.10307
Wind	NREL	3	8	10.5	13	16.5	20	6	13.6667	6.02771	0.441052

## Sheet: Intensity by country
Country	Year	DB type	Source	GWP100	Unit	Notes	Data from figure 2 in manuscript
BE	2017	Physical	JRC	217.128	g/kWh
BG	2017	Physical	JRC	658.428	g/kWh
CZ	2017	Physical	JRC	659.619	g/kWh
DK	2017	Physical	JRC	140.558	g/kWh
DE	2017	Physical	JRC	474.827	g/kWh
EE	2017	Physical	JRC	1032.47	g/kWh
IE	2017	Physical	JRC	422.844	g/kWh
GR	2017	Physical	JRC	615.218	g/kWh
ES	2017	Physical	JRC	338.13	g/kWh
FR	2017	Physical	JRC	87.2297	g/kWh
HR	2017	Physical	JRC	418.883	g/kWh
IT	2017	Physical	JRC	327.67	g/kWh
CY	2017	Physical	JRC	722.279	g/kWh
LV	2017	Physical	JRC	370.214	g/kWh
LT	2017	Physical	JRC	70.6746	g/kWh
LU	2017	Physical	JRC	437.211	g/kWh
HU	2017	Physical	JRC	282.303	g/kWh
MT	2017	Physical	JRC	423.599	g/kWh
NL	2017	Physical	JRC	466.042	g/kWh
AT	2017	Physical	JRC	315.531	g/kWh
PL	2017	Physical	JRC	867.558	g/kWh
PT	2017	Physical	JRC	423.487	g/kWh
RO	2017	Physical	JRC	471.222	g/kWh
SI	2017	Physical	JRC	235.522	g/kWh
SK	2017	Physical	JRC	429.076	g/kWh
FI	2017	Physical	JRC	98.4943	g/kWh
SE	2017	Physical	JRC	17.047	g/kWh
AT	2017	Physical	Electricity Maps	90.4851	g/kWh	generation shares from ENTSO-E
AT	2017	Hybrid	EXIO Hybrid	154.309	g/kWh	generation shares from ENTSO-E
BE	2017	Physical	Electricity Maps	141.315	g/kWh	generation shares from ENTSO-E
BE	2017	Hybrid	EXIO Hybrid	185.214	g/kWh	generation shares from ENTSO-E
BG	2017	Physical	Electricity Maps	545.012	g/kWh	generation shares from ENTSO-E
BG	2017	Hybrid	EXIO Hybrid	542.046	g/kWh	generation shares from ENTSO-E
CZ	2017	Physical	Electricity Maps	553.2	g/kWh	generation shares from ENTSO-E
CZ	2017	Hybrid	EXIO Hybrid	558.408	g/kWh	generation shares from ENTSO-E
DE	2017	Physical	Electricity Maps	448.703	g/kWh	generation shares from ENTSO-E
DE	2017	Hybrid	EXIO Hybrid	454.991	g/kWh	generation shares from ENTSO-E
DK	2017	Physical	Electricity Maps	173.257	g/kWh	generation shares from ENTSO-E
DK	2017	Hybrid	EXIO Hybrid	229.582	g/kWh	generation shares from ENTSO-E
EE	2017	Physical	Electricity Maps	574.275	g/kWh	generation shares from ENTSO-E
EE	2017	Hybrid	EXIO Hybrid	544.22	g/kWh	generation shares from ENTSO-E
GR	2017	Physical	Electricity Maps	604.555	g/kWh	generation shares from ENTSO-E
GR	2017	Hybrid	EXIO Hybrid	599.792	g/kWh	generation shares from ENTSO-E
ES	2017	Physical	Electricity Maps	314.685	g/kWh	generation shares from ENTSO-E
ES	2017	Hybrid	EXIO Hybrid	299.239	g/kWh	generation shares from ENTSO-E
FI	2017	Physical	Electricity Maps	155.89	g/kWh	generation shares from ENTSO-E
FI	2017	Hybrid	EXIO Hybrid	246.013	g/kWh	generation shares from ENTSO-E
FR	2017	Physical	Electricity Maps	51.0338	g/kWh	generation shares from ENTSO-E
FR	2017	Hybrid	EXIO Hybrid	71.5099	g/kWh	generation shares from ENTSO-E
HR	2017	Physical	Electricity Maps	229.137	g/kWh	generation shares from ENTSO-E
HR	2017	Hybrid	EXIO Hybrid	270.189	g/kWh	generation shares from ENTSO-E
HU	2017	Physical	Electricity Maps	320.612	g/kWh	generation shares from ENTSO-E
HU	2017	Hybrid	EXIO Hybrid	317.412	g/kWh	generation shares from ENTSO-E
IE	2017	Physical	Electricity Maps	505.248	g/kWh	generation shares from ENTSO-E
IE	2017	Hybrid	EXIO Hybrid	453.891	g/kWh	generation shares from ENTSO-E
IT	2017	Physical	Electricity Maps	384.552	g/kWh	generation shares from ENTSO-E
IT	2017	Hybrid	EXIO Hybrid	345.193	g/kWh	generation shares from ENTSO-E
LT	2017	Physical	Electricity Maps	104.417	g/kWh	generation shares from ENTSO-E
LT	2017	Hybrid	EXIO Hybrid	120.289	g/kWh	generation shares from ENTSO-E
LV	2017	Physical	Electricity Maps	134.805	g/kWh	generation shares from ENTSO-E
LV	2017	Hybrid	EXIO Hybrid	144.456	g/kWh	generation shares from ENTSO-E
NL	2017	Physical	Electricity Maps	527.982	g/kWh	generation shares from ENTSO-E
NL	2017	Hybrid	EXIO Hybrid	395.235	g/kWh	generation shares from ENTSO-E
PL	2017	Physical	Electricity Maps	916.434	g/kWh	generation shares from ENTSO-E
PL	2017	Hybrid	EXIO Hybrid	760.243	g/kWh	generation shares from ENTSO-E
PT	2017	Physical	Electricity Maps	393.22	g/kWh	generation shares from ENTSO-E
PT	2017	Hybrid	EXIO Hybrid	398.856	g/kWh	generation shares from ENTSO-E
RO	2017	Physical	Electricity Maps	430.136	g/kWh	generation shares from ENTSO-E
RO	2017	Hybrid	EXIO Hybrid	400.543	g/kWh	generation shares from ENTSO-E
SE	2017	Physical	Electricity Maps	1.52382	g/kWh	generation shares from ENTSO-E
SE	2017	Hybrid	EXIO Hybrid	0.0181888	g/kWh	generation shares from ENTSO-E
SI	2017	Physical	Electricity Maps	305.808	g/kWh	generation shares from ENTSO-E
SI	2017	Hybrid	EXIO Hybrid	292.216	g/kWh	generation shares from ENTSO-E
SK	2017	Physical	Electricity Maps	169.084	g/kWh	generation shares from ENTSO-E
SK	2017	Hybrid	EXIO Hybrid	138.96	g/kWh	generation shares from ENTSO-E
US	2017	Physical	Electricity Maps	438.912	g/kWh	generation shares from ENTSO-E
US	2017	Hybrid	EXIO Hybrid	441.135	g/kWh	generation shares from ENTSO-E
AT	2017	Monetary	EORA	47.7124	g/kWh
BE	2017	Monetary	EORA	159.508	g/kWh
BG	2017	Monetary	EORA	217.288	g/kWh
CY	2017	Monetary	EORA	454.296	g/kWh
CZ	2017	Monetary	EORA	165.323	g/kWh
DE	2017	Monetary	EORA	141.561	g/kWh
DK	2017	Monetary	EORA	163.339	g/kWh
ES	2017	Monetary	EORA	172.577	g/kWh
EE	2017	Monetary	EORA	351.577	g/kWh
FI	2017	Monetary	EORA	189.922	g/kWh
FR	2017	Monetary	EORA	39.9508	g/kWh
GR	2017	Monetary	EORA	492.56	g/kWh
HR	2017	Monetary	EORA	120.422	g/kWh
HU	2017	Monetary	EORA	113.956	g/kWh
IE	2017	Monetary	EORA	277.487	g/kWh
IT	2017	Monetary	EORA	170.17	g/kWh
LT	2017	Monetary	EORA	93.4895	g/kWh
LU	2017	Monetary	EORA	62.354	g/kWh
LV	2017	Monetary	EORA	113.062	g/kWh
MT	2017	Monetary	EORA	430.806	g/kWh
NL	2017	Monetary	EORA	131.931	g/kWh
PL	2017	Monetary	EORA	279.232	g/kWh
PT	2017	Monetary	EORA	159.877	g/kWh
RO	2017	Monetary	EORA	120.637	g/kWh
SK	2017	Monetary	EORA	47.0966	g/kWh
SI	2017	Monetary	EORA	240.44	g/kWh
SE	2017	Monetary	EORA	37.5882	g/kWh
US	2017	Monetary	EORA	322.472	g/kWh
AT	2017	Monetary	GLORIA act	54.6251	g/kWh
BE	2017	Monetary	GLORIA act	140.961	g/kWh
BG	2017	Monetary	GLORIA act	597.028	g/kWh
CY	2017	Monetary	GLORIA act	497.205	g/kWh
CZ	2017	Monetary	GLORIA act	333.156	g/kWh
DE	2017	Monetary	GLORIA act	217.133	g/kWh
DK	2017	Monetary	GLORIA act	127.202	g/kWh
ES	2017	Monetary	GLORIA act	174.399	g/kWh
EE	2017	Monetary	GLORIA act	450.158	g/kWh
FI	2017	Monetary	GLORIA act	128.648	g/kWh
FR	2017	Monetary	GLORIA act	40.5713	g/kWh
GR	2017	Monetary	GLORIA act	251.467	g/kWh
HR	2017	Monetary	GLORIA act	99.9135	g/kWh
HU	2017	Monetary	GLORIA act	197.181	g/kWh
IE	2017	Monetary	GLORIA act	310.203	g/kWh
IT	2017	Monetary	GLORIA act	151.118	g/kWh
LT	2017	Monetary	GLORIA act	57.6241	g/kWh
LU	2017	Monetary	GLORIA act	14.0905	g/kWh
LV	2017	Monetary	GLORIA act	62.3172	g/kWh
MT	2017	Monetary	GLORIA act	82.1957	g/kWh
NL	2017	Monetary	GLORIA act	239.178	g/kWh
PL	2017	Monetary	GLORIA act	551.566	g/kWh
PT	2017	Monetary	GLORIA act	149.693	g/kWh
RO	2017	Monetary	GLORIA act	223.129	g/kWh
SK	2017	Monetary	GLORIA act	86.1862	g/kWh
SI	2017	Monetary	GLORIA act	160.864	g/kWh
SE	2017	Monetary	GLORIA act	36.3745	g/kWh
US	2017	Monetary	GLORIA act	380.968	g/kWh
AT	2017	Monetary	EXIOBASE ixi	24.8677	g/kWh
BE	2017	Monetary	EXIOBASE ixi	120.054	g/kWh
BG	2017	Monetary	EXIOBASE ixi	379.965	g/kWh
CY	2017	Monetary	EXIOBASE ixi	441.622	g/kWh
CZ	2017	Monetary	EXIOBASE ixi	249.897	g/kWh
DE	2017	Monetary	EXIOBASE ixi	171.673	g/kWh
DK	2017	Monetary	EXIOBASE ixi	11.1562	g/kWh
EE	2017	Monetary	EXIOBASE ixi	266.076	g/kWh
ES	2017	Monetary	EXIOBASE ixi	232.698	g/kWh
FI	2017	Monetary	EXIOBASE ixi	60.2133	g/kWh
FR	2017	Monetary	EXIOBASE ixi	37.8066	g/kWh
GR	2017	Monetary	EXIOBASE ixi	251.428	g/kWh
HR	2017	Monetary	EXIOBASE ixi	98.733	g/kWh
HU	2017	Monetary	EXIOBASE ixi	126.91	g/kWh
IE	2017	Monetary	EXIOBASE ixi	318.413	g/kWh
IT	2017	Monetary	EXIOBASE ixi	189.689	g/kWh
LT	2017	Monetary	EXIOBASE ixi	14.3544	g/kWh
LU	2017	Monetary	EXIOBASE ixi	13.3493	g/kWh
LV	2017	Monetary	EXIOBASE ixi	26.1845	g/kWh
MT	2017	Monetary	EXIOBASE ixi	83.0254	g/kWh
NL	2017	Monetary	EXIOBASE ixi	220.722	g/kWh
PL	2017	Monetary	EXIOBASE ixi	427.726	g/kWh
PT	2017	Monetary	EXIOBASE ixi	168.878	g/kWh
RO	2017	Monetary	EXIOBASE ixi	291.775	g/kWh
SE	2017	Monetary	EXIOBASE ixi	1.69458	g/kWh
SI	2017	Monetary	EXIOBASE ixi	188.997	g/kWh
SK	2017	Monetary	EXIOBASE ixi	86.1193	g/kWh
US	2017	Monetary	EXIOBASE ixi	457.322	g/kWh
AT	2017	Monetary	EXIOBASE pxp	35.7095	g/kWh
BE	2017	Monetary	EXIOBASE pxp	200.247	g/kWh
BG	2017	Monetary	EXIOBASE pxp	615.315	g/kWh
CY	2017	Monetary	EXIOBASE pxp	547.802	g/kWh
CZ	2017	Monetary	EXIOBASE pxp	384.755	g/kWh
DE	2017	Monetary	EXIOBASE pxp	263.736	g/kWh
DK	2017	Monetary	EXIOBASE pxp	9.64601	g/kWh
EE	2017	Monetary	EXIOBASE pxp	288.796	g/kWh
ES	2017	Monetary	EXIOBASE pxp	383.343	g/kWh
FI	2017	Monetary	EXIOBASE pxp	70.2215	g/kWh
FR	2017	Monetary	EXIOBASE pxp	49.6596	g/kWh
GR	2017	Monetary	EXIOBASE pxp	379.904	g/kWh
HR	2017	Monetary	EXIOBASE pxp	139.039	g/kWh
HU	2017	Monetary	EXIOBASE pxp	162.662	g/kWh
IE	2017	Monetary	EXIOBASE pxp	452.27	g/kWh
IT	2017	Monetary	EXIOBASE pxp	265.848	g/kWh
LT	2017	Monetary	EXIOBASE pxp	18.6493	g/kWh
LU	2017	Monetary	EXIOBASE pxp	4.10902	g/kWh
LV	2017	Monetary	EXIOBASE pxp	21.4197	g/kWh
MT	2017	Monetary	EXIOBASE pxp	125.986	g/kWh
NL	2017	Monetary	EXIOBASE pxp	266.424	g/kWh
PL	2017	Monetary	EXIOBASE pxp	577.243	g/kWh
PT	2017	Monetary	EXIOBASE pxp	254.549	g/kWh
RO	2017	Monetary	EXIOBASE pxp	425.48	g/kWh
SE	2017	Monetary	EXIOBASE pxp	1.18422	g/kWh
SI	2017	Monetary	EXIOBASE pxp	171.877	g/kWh
SK	2017	Monetary	EXIOBASE pxp	56.4883	g/kWh
US	2017	Monetary	EXIOBASE pxp	675.655	g/kWh
AT	2017	Monetary	EMERGING	24.5662	g/kWh
BE	2017	Monetary	EMERGING	20.6669	g/kWh
BG	2017	Monetary	EMERGING	488.435	g/kWh
CY	2017	Monetary	EMERGING	263.724	g/kWh
CZ	2017	Monetary	EMERGING	169.774	g/kWh
DE	2017	Monetary	EMERGING	288.79	g/kWh
DK	2017	Monetary	EMERGING	48.1378	g/kWh
ES	2017	Monetary	EMERGING	58.8313	g/kWh
EE	2017	Monetary	EMERGING	561.787	g/kWh
FI	2017	Monetary	EMERGING	116.685	g/kWh
FR	2017	Monetary	EMERGING	25.3326	g/kWh
GR	2017	Monetary	EMERGING	356.693	g/kWh
HR	2017	Monetary	EMERGING	42.2704	g/kWh
HU	2017	Monetary	EMERGING	83.9646	g/kWh
IE	2017	Monetary	EMERGING	208.023	g/kWh
IT	2017	Monetary	EMERGING	86.2969	g/kWh
LT	2017	Monetary	EMERGING	5.86163	g/kWh
LU	2017	Monetary	EMERGING	310.776	g/kWh
LV	2017	Monetary	EMERGING	36.8783	g/kWh
MT	2017	Monetary	EMERGING	219.379	g/kWh
NL	2017	Monetary	EMERGING	242.474	g/kWh
PL	2017	Monetary	EMERGING	357.07	g/kWh
PT	2017	Monetary	EMERGING	255.448	g/kWh
RO	2017	Monetary	EMERGING	128.633	g/kWh
SK	2017	Monetary	EMERGING	52.6804	g/kWh
SI	2017	Monetary	EMERGING	200.623	g/kWh
SE	2017	Monetary	EMERGING	7.31368	g/kWh
US	2017	Monetary	EMERGING	359.144	g/kWh
AT	2017	Monetary	GTAP	198.515	g/kWh
BE	2017	Monetary	GTAP	188.047	g/kWh
BG	2017	Monetary	GTAP	403.522	g/kWh
CY	2017	Monetary	GTAP	117.121	g/kWh
CZ	2017	Monetary	GTAP	528.348	g/kWh
DE	2017	Monetary	GTAP	630.869	g/kWh
DK	2017	Monetary	GTAP	174.412	g/kWh
ES	2017	Monetary	GTAP	289.997	g/kWh
EE	2017	Monetary	GTAP	211.541	g/kWh
FI	2017	Monetary	GTAP	187.848	g/kWh
FR	2017	Monetary	GTAP	103.063	g/kWh
GR	2017	Monetary	GTAP	706.28	g/kWh
HR	2017	Monetary	GTAP	302.975	g/kWh
HU	2017	Monetary	GTAP	265.832	g/kWh
IE	2017	Monetary	GTAP	582.572	g/kWh
IT	2017	Monetary	GTAP	315.837	g/kWh
LT	2017	Monetary	GTAP	64.0431	g/kWh
LU	2017	Monetary	GTAP	172.776	g/kWh
LV	2017	Monetary	GTAP	148.877	g/kWh
MT	2017	Monetary	GTAP	518.857	g/kWh
NL	2017	Monetary	GTAP	444.74	g/kWh
PL	2017	Monetary	GTAP	726.978	g/kWh
PT	2017	Monetary	GTAP	481.551	g/kWh
RO	2017	Monetary	GTAP	369.798	g/kWh
SK	2017	Monetary	GTAP	267.394	g/kWh
SI	2017	Monetary	GTAP	335.984	g/kWh
SE	2017	Monetary	GTAP	28.6009	g/kWh
US	2017	Monetary	GTAP	425.422	g/kWh
AT	2023	Physical	Electricity Maps	43.1471	g/kWh
AT	2023	Hybrid	EXIO Hybrid	86.7787	g/kWh	generation shares from ENTSO-E
BE	2023	Physical	Electricity Maps	121.142	g/kWh
BE	2023	Hybrid	EXIO Hybrid	135.436	g/kWh	generation shares from ENTSO-E
BG	2023	Physical	Electricity Maps	405.077	g/kWh
BG	2023	Hybrid	EXIO Hybrid	405.835	g/kWh	generation shares from ENTSO-E
CZ	2023	Physical	Electricity Maps	440.538	g/kWh
CZ	2023	Hybrid	EXIO Hybrid	443.855	g/kWh	generation shares from ENTSO-E
DE	2023	Physical	Electricity Maps	328.284	g/kWh
DE	2023	Hybrid	EXIO Hybrid	335.989	g/kWh	generation shares from ENTSO-E
DK	2023	Physical	Electricity Maps	97.3162	g/kWh
DK	2023	Hybrid	EXIO Hybrid	133.422	g/kWh	generation shares from ENTSO-E
EE	2023	Physical	Electricity Maps	382.459	g/kWh
EE	2023	Hybrid	EXIO Hybrid	381.457	g/kWh	generation shares from ENTSO-E
GR	2023	Physical	Electricity Maps	277.55	g/kWh
GR	2023	Hybrid	EXIO Hybrid	313.166	g/kWh	generation shares from ENTSO-E
ES	2023	Physical	Electricity Maps	108.388	g/kWh
ES	2023	Hybrid	EXIO Hybrid	137.248	g/kWh	generation shares from ENTSO-E
FI	2023	Physical	Electricity Maps	47.6016	g/kWh
FI	2023	Hybrid	EXIO Hybrid	76.671	g/kWh	generation shares from ENTSO-E
FR	2023	Physical	Electricity Maps	26.9109	g/kWh
FR	2023	Hybrid	EXIO Hybrid	43.7587	g/kWh	generation shares from ENTSO-E
HR	2023	Physical	Electricity Maps	164.677	g/kWh
HR	2023	Hybrid	EXIO Hybrid	198.039	g/kWh	generation shares from ENTSO-E
HU	2023	Physical	Electricity Maps	210.959	g/kWh
HU	2023	Hybrid	EXIO Hybrid	219.841	g/kWh	generation shares from ENTSO-E
IE	2023	Physical	Electricity Maps	299.496	g/kWh
IE	2023	Hybrid	EXIO Hybrid	304.419	g/kWh	generation shares from ENTSO-E
IT	2023	Physical	Electricity Maps	294.727	g/kWh
IT	2023	Hybrid	EXIO Hybrid	331.748	g/kWh	generation shares from ENTSO-E
LT	2023	Physical	Electricity Maps	57.436	g/kWh
LT	2023	Hybrid	EXIO Hybrid	77.9803	g/kWh	generation shares from ENTSO-E
LV	2023	Physical	Electricity Maps	103.634	g/kWh
LV	2023	Hybrid	EXIO Hybrid	159.562	g/kWh	generation shares from ENTSO-E
NL	2023	Physical	Electricity Maps	405.87	g/kWh
NL	2023	Hybrid	EXIO Hybrid	261.453	g/kWh	generation shares from ENTSO-E
PL	2023	Physical	Electricity Maps	728.438	g/kWh
PL	2023	Hybrid	EXIO Hybrid	620.893	g/kWh	generation shares from ENTSO-E
PT	2023	Physical	Electricity Maps	86.6269	g/kWh
PT	2023	Hybrid	EXIO Hybrid	120.92	g/kWh	generation shares from ENTSO-E
RO	2023	Physical	Electricity Maps	272.785	g/kWh
RO	2023	Hybrid	EXIO Hybrid	265.598	g/kWh	generation shares from ENTSO-E
SE	2023	Physical	Electricity Maps	1.34286	g/kWh
SE	2023	Hybrid	EXIO Hybrid	0.0325183	g/kWh	generation shares from ENTSO-E
SI	2023	Physical	Electricity Maps	220.885	g/kWh
SI	2023	Hybrid	EXIO Hybrid	213.259	g/kWh	generation shares from ENTSO-E
SK	2023	Physical	Electricity Maps	97.6116	g/kWh
SK	2023	Hybrid	EXIO Hybrid	91.1406	g/kWh	generation shares from ENTSO-E
US	2023	Physical	Electricity Maps	341.319	g/kWh
US	2023	Hybrid	EXIO Hybrid	359.447	g/kWh	generation shares from ENTSO-E
AT	2023	Monetary	EMERGING	221.659	g/kWh
BE	2023	Monetary	EMERGING	35.453	g/kWh
BG	2023	Monetary	EMERGING	216.677	g/kWh
CY	2023	Monetary	EMERGING	559.896	g/kWh
CZ	2023	Monetary	EMERGING	999.972	g/kWh
DE	2023	Monetary	EMERGING	176.832	g/kWh
DK	2023	Monetary	EMERGING	147.105	g/kWh
ES	2023	Monetary	EMERGING	135.768	g/kWh
EE	2023	Monetary	EMERGING	611.589	g/kWh
FI	2023	Monetary	EMERGING	78.3888	g/kWh
FR	2023	Monetary	EMERGING	62.1562	g/kWh
GR	2023	Monetary	EMERGING	447.512	g/kWh
HR	2023	Monetary	EMERGING	184.12	g/kWh
HU	2023	Monetary	EMERGING	1104.21	g/kWh
IE	2023	Monetary	EMERGING	302.029	g/kWh
IT	2023	Monetary	EMERGING	163.959	g/kWh
LT	2023	Monetary	EMERGING	5.94325	g/kWh
LU	2023	Monetary	EMERGING	921.514	g/kWh
LV	2023	Monetary	EMERGING	194.106	g/kWh
MT	2023	Monetary	EMERGING	301.506	g/kWh
NL	2023	Monetary	EMERGING	90.4718	g/kWh
PL	2023	Monetary	EMERGING	1013.64	g/kWh
PT	2023	Monetary	EMERGING	129.917	g/kWh
RO	2023	Monetary	EMERGING	631.22	g/kWh
SK	2023	Monetary	EMERGING	207.611	g/kWh
SI	2023	Monetary	EMERGING	480.129	g/kWh
SE	2023	Monetary	EMERGING	12.438	g/kWh
US	2023	Monetary	EMERGING	583.129	g/kWh

## Sheet: Footprint by country
Country	Year	DB type	Source	GWP100	Unit	Notes	Data from figure 2 in manuscript
BE	2017	Physical	JRC	230.389	g/kWh
BG	2017	Physical	JRC	573.846	g/kWh
CZ	2017	Physical	JRC	624.09	g/kWh
DK	2017	Physical	JRC	170.597	g/kWh
DE	2017	Physical	JRC	441.606	g/kWh
EE	2017	Physical	JRC	725.162	g/kWh
IE	2017	Physical	JRC	401.095	g/kWh
GR	2017	Physical	JRC	651.403	g/kWh
ES	2017	Physical	JRC	301.475	g/kWh
FR	2017	Physical	JRC	86.1058	g/kWh
HR	2017	Physical	JRC	385.977	g/kWh
IT	2017	Physical	JRC	381.987	g/kWh
CY	2017	Physical	JRC	858.812	g/kWh
LV	2017	Physical	JRC	477.039	g/kWh
LT	2017	Physical	JRC	89.0415	g/kWh
LU	2017	Physical	JRC	363.384	g/kWh
HU	2017	Physical	JRC	289.247	g/kWh
MT	2017	Physical	JRC	492.487	g/kWh
NL	2017	Physical	JRC	476.348	g/kWh
AT	2017	Physical	JRC	292.545	g/kWh
PL	2017	Physical	JRC	872.772	g/kWh
PT	2017	Physical	JRC	352.699	g/kWh
RO	2017	Physical	JRC	503.368	g/kWh
SI	2017	Physical	JRC	249.586	g/kWh
SK	2017	Physical	JRC	397.299	g/kWh
FI	2017	Physical	JRC	95.4828	g/kWh
SE	2017	Physical	JRC	27.4909	g/kWh
AT	2017	Physical	Electricity Maps	156	g/kWh
BE	2017	Physical	Electricity Maps	203	g/kWh
BG	2017	Physical	Electricity Maps	552	g/kWh
CY	2017	Physical	Electricity Maps	897	g/kWh
CZ	2017	Physical	Electricity Maps	601	g/kWh
DE	2017	Physical	Electricity Maps	520	g/kWh
DK	2017	Physical	Electricity Maps	294	g/kWh
EE	2017	Physical	Electricity Maps	778	g/kWh
ES	2017	Physical	Electricity Maps	329	g/kWh
FI	2017	Physical	Electricity Maps	229	g/kWh
FR	2017	Physical	Electricity Maps	72	g/kWh
GR	2017	Physical	Electricity Maps	776	g/kWh
HR	2017	Physical	Electricity Maps	261	g/kWh
HU	2017	Physical	Electricity Maps	354	g/kWh
IE	2017	Physical	Electricity Maps	409	g/kWh
IT	2017	Physical	Electricity Maps	456	g/kWh
LT	2017	Physical	Electricity Maps	190	g/kWh
LV	2017	Physical	Electricity Maps	211	g/kWh
NL	2017	Physical	Electricity Maps	579	g/kWh
PL	2017	Physical	Electricity Maps	956	g/kWh
PT	2017	Physical	Electricity Maps	476	g/kWh
RO	2017	Physical	Electricity Maps	488	g/kWh
SE	2017	Physical	Electricity Maps	20	g/kWh
SI	2017	Physical	Electricity Maps	327	g/kWh
SK	2017	Physical	Electricity Maps	234	g/kWh
US	2017	Physical	Electricity Maps	468	g/kWh
AT	2017	Physical	EMBER	163	g/kWh
BE	2017	Physical	EMBER	159	g/kWh
BG	2017	Physical	EMBER	503	g/kWh
CY	2017	Physical	EMBER	606	g/kWh
CZ	2017	Physical	EMBER	542	g/kWh
DE	2017	Physical	EMBER	470	g/kWh
DK	2017	Physical	EMBER	283	g/kWh
EE	2017	Physical	EMBER	583	g/kWh
ES	2017	Physical	EMBER	329	g/kWh
FI	2017	Physical	EMBER	186	g/kWh
FR	2017	Physical	EMBER	78.3	g/kWh
GR	2017	Physical	EMBER	580	g/kWh
HR	2017	Physical	EMBER	256	g/kWh
HU	2017	Physical	EMBER	291	g/kWh
IE	2017	Physical	EMBER	404	g/kWh
IT	2017	Physical	EMBER	393	g/kWh
LT	2017	Physical	EMBER	183	g/kWh
LV	2017	Physical	EMBER	141	g/kWh
NL	2017	Physical	EMBER	490	g/kWh
PL	2017	Physical	EMBER	806	g/kWh
PT	2017	Physical	EMBER	434	g/kWh
RO	2017	Physical	EMBER	369	g/kWh
SE	2017	Physical	EMBER	42.5	g/kWh
SI	2017	Physical	EMBER	318	g/kWh
SK	2017	Physical	EMBER	183	g/kWh
US	2017	Physical	EMBER	469	g/kWh
AT	2017	Hybrid	EXIO Hybrid	430.335	g/kWh	generation shares from ENTSO-E
AT	2017	Physical	NREL	126.763	g/kWh	generation shares from ENTSO-E
AT	2017	Physical	IPCC	131.243	g/kWh	generation shares from ENTSO-E
BE	2017	Hybrid	EXIO Hybrid	322.755	g/kWh	generation shares from ENTSO-E
BE	2017	Physical	NREL	163.018	g/kWh	generation shares from ENTSO-E
BE	2017	Physical	IPCC	163.105	g/kWh	generation shares from ENTSO-E
BG	2017	Hybrid	EXIO Hybrid	816.819	g/kWh	generation shares from ENTSO-E
BG	2017	Physical	NREL	489.599	g/kWh	generation shares from ENTSO-E
BG	2017	Physical	IPCC	414.849	g/kWh	generation shares from ENTSO-E
CZ	2017	Hybrid	EXIO Hybrid	1164.76	g/kWh	generation shares from ENTSO-E
CZ	2017	Physical	NREL	533.732	g/kWh	generation shares from ENTSO-E
CZ	2017	Physical	IPCC	452.13	g/kWh	generation shares from ENTSO-E
DE	2017	Hybrid	EXIO Hybrid	761.224	g/kWh	generation shares from ENTSO-E
DE	2017	Physical	NREL	470.795	g/kWh	generation shares from ENTSO-E
DE	2017	Physical	IPCC	409.88	g/kWh	generation shares from ENTSO-E
DK	2017	Hybrid	EXIO Hybrid	471.12	g/kWh	generation shares from ENTSO-E
DK	2017	Physical	NREL	293.692	g/kWh	generation shares from ENTSO-E
DK	2017	Physical	IPCC	262.812	g/kWh	generation shares from ENTSO-E
EE	2017	Hybrid	EXIO Hybrid	1406.68	g/kWh	generation shares from ENTSO-E
EE	2017	Physical	NREL	789.088	g/kWh	generation shares from ENTSO-E
EE	2017	Physical	IPCC	782.286	g/kWh	generation shares from ENTSO-E
GR	2017	Hybrid	EXIO Hybrid	831.496	g/kWh	generation shares from ENTSO-E
GR	2017	Physical	NREL	553.867	g/kWh	generation shares from ENTSO-E
GR	2017	Physical	IPCC	494.791	g/kWh	generation shares from ENTSO-E
ES	2017	Hybrid	EXIO Hybrid	599.671	g/kWh	generation shares from ENTSO-E
ES	2017	Physical	NREL	307.652	g/kWh	generation shares from ENTSO-E
ES	2017	Physical	IPCC	280.243	g/kWh	generation shares from ENTSO-E
FI	2017	Hybrid	EXIO Hybrid	627.107	g/kWh	generation shares from ENTSO-E
FI	2017	Physical	NREL	223.21	g/kWh	generation shares from ENTSO-E
FI	2017	Physical	IPCC	200.906	g/kWh	generation shares from ENTSO-E
FR	2017	Hybrid	EXIO Hybrid	199.538	g/kWh	generation shares from ENTSO-E
FR	2017	Physical	NREL	74.7434	g/kWh	generation shares from ENTSO-E
FR	2017	Physical	IPCC	72.3444	g/kWh	generation shares from ENTSO-E
HR	2017	Hybrid	EXIO Hybrid	432.947	g/kWh	generation shares from ENTSO-E
HR	2017	Physical	NREL	259.009	g/kWh	generation shares from ENTSO-E
HR	2017	Physical	IPCC	246.688	g/kWh	generation shares from ENTSO-E
HU	2017	Hybrid	EXIO Hybrid	454.57	g/kWh	generation shares from ENTSO-E
HU	2017	Physical	NREL	296.504	g/kWh	generation shares from ENTSO-E
HU	2017	Physical	IPCC	270.04	g/kWh	generation shares from ENTSO-E
IE	2017	Hybrid	EXIO Hybrid	775.997	g/kWh	generation shares from ENTSO-E
IE	2017	Physical	NREL	488.425	g/kWh	generation shares from ENTSO-E
IE	2017	Physical	IPCC	453.497	g/kWh	generation shares from ENTSO-E
IT	2017	Hybrid	EXIO Hybrid	720.438	g/kWh	generation shares from ENTSO-E
IT	2017	Physical	NREL	339.897	g/kWh	generation shares from ENTSO-E
IT	2017	Physical	IPCC	322.423	g/kWh	generation shares from ENTSO-E
LT	2017	Hybrid	EXIO Hybrid	284.476	g/kWh	generation shares from ENTSO-E
LT	2017	Physical	NREL	142.556	g/kWh	generation shares from ENTSO-E
LT	2017	Physical	IPCC	146.581	g/kWh	generation shares from ENTSO-E
LV	2017	Hybrid	EXIO Hybrid	252.124	g/kWh	generation shares from ENTSO-E
LV	2017	Physical	NREL	139.732	g/kWh	generation shares from ENTSO-E
LV	2017	Physical	IPCC	149.212	g/kWh	generation shares from ENTSO-E
NL	2017	Hybrid	EXIO Hybrid	663.794	g/kWh	generation shares from ENTSO-E
NL	2017	Physical	NREL	618.265	g/kWh	generation shares from ENTSO-E
NL	2017	Physical	IPCC	560.591	g/kWh	generation shares from ENTSO-E
PL	2017	Hybrid	EXIO Hybrid	1641.53	g/kWh	generation shares from ENTSO-E
PL	2017	Physical	NREL	843.815	g/kWh	generation shares from ENTSO-E
PL	2017	Physical	IPCC	711.591	g/kWh	generation shares from ENTSO-E
PT	2017	Hybrid	EXIO Hybrid	724.825	g/kWh	generation shares from ENTSO-E
PT	2017	Physical	NREL	420.916	g/kWh	generation shares from ENTSO-E
PT	2017	Physical	IPCC	383.216	g/kWh	generation shares from ENTSO-E
RO	2017	Hybrid	EXIO Hybrid	547.703	g/kWh	generation shares from ENTSO-E
RO	2017	Physical	NREL	358.499	g/kWh	generation shares from ENTSO-E
RO	2017	Physical	IPCC	317.847	g/kWh	generation shares from ENTSO-E
SE	2017	Hybrid	EXIO Hybrid	10.4414	g/kWh	generation shares from ENTSO-E
SE	2017	Physical	NREL	11.9712	g/kWh	generation shares from ENTSO-E
SE	2017	Physical	IPCC	17.2487	g/kWh	generation shares from ENTSO-E
SI	2017	Hybrid	EXIO Hybrid	383.772	g/kWh	generation shares from ENTSO-E
SI	2017	Physical	NREL	302.363	g/kWh	generation shares from ENTSO-E
SI	2017	Physical	IPCC	259.25	g/kWh	generation shares from ENTSO-E
SK	2017	Hybrid	EXIO Hybrid	272.577	g/kWh	generation shares from ENTSO-E
SK	2017	Physical	NREL	147.152	g/kWh	generation shares from ENTSO-E
SK	2017	Physical	IPCC	133.473	g/kWh	generation shares from ENTSO-E
US	2017	Hybrid	EXIO Hybrid	842.675	g/kWh	generation shares from ENTSO-E
US	2017	Physical	NREL	473.879	g/kWh	generation shares from ENTSO-E
US	2017	Physical	IPCC	423.825	g/kWh	generation shares from ENTSO-E
AT	2017	Monetary	EXIOBASE pxp	76.3788	g/kWh
BE	2017	Monetary	EXIOBASE pxp	222.262	g/kWh
BG	2017	Monetary	EXIOBASE pxp	672.128	g/kWh
CY	2017	Monetary	EXIOBASE pxp	630.826	g/kWh
CZ	2017	Monetary	EXIOBASE pxp	428.794	g/kWh
DE	2017	Monetary	EXIOBASE pxp	285.731	g/kWh
DK	2017	Monetary	EXIOBASE pxp	20.5539	g/kWh
EE	2017	Monetary	EXIOBASE pxp	310.317	g/kWh
ES	2017	Monetary	EXIOBASE pxp	407.481	g/kWh
FI	2017	Monetary	EXIOBASE pxp	81.492	g/kWh
FR	2017	Monetary	EXIOBASE pxp	67.8777	g/kWh
GR	2017	Monetary	EXIOBASE pxp	417.254	g/kWh
HR	2017	Monetary	EXIOBASE pxp	167.305	g/kWh
HU	2017	Monetary	EXIOBASE pxp	185.33	g/kWh
IE	2017	Monetary	EXIOBASE pxp	470.328	g/kWh
IT	2017	Monetary	EXIOBASE pxp	288.75	g/kWh
LT	2017	Monetary	EXIOBASE pxp	37.3756	g/kWh
LU	2017	Monetary	EXIOBASE pxp	20.3824	g/kWh
LV	2017	Monetary	EXIOBASE pxp	38.8274	g/kWh
MT	2017	Monetary	EXIOBASE pxp	188.384	g/kWh
NL	2017	Monetary	EXIOBASE pxp	301.218	g/kWh
PL	2017	Monetary	EXIOBASE pxp	618.994	g/kWh
PT	2017	Monetary	EXIOBASE pxp	307.141	g/kWh
RO	2017	Monetary	EXIOBASE pxp	477.965	g/kWh
SE	2017	Monetary	EXIOBASE pxp	9.09625	g/kWh
SI	2017	Monetary	EXIOBASE pxp	187.876	g/kWh
SK	2017	Monetary	EXIOBASE pxp	118.744	g/kWh
US	2017	Monetary	EXIOBASE pxp	684.7	g/kWh
AT	2017	Monetary	EXIOBASE ixi	73.4073	g/kWh
BE	2017	Monetary	EXIOBASE ixi	150.762	g/kWh
BG	2017	Monetary	EXIOBASE ixi	428.404	g/kWh
CY	2017	Monetary	EXIOBASE ixi	506.671	g/kWh
CZ	2017	Monetary	EXIOBASE ixi	303.604	g/kWh
DE	2017	Monetary	EXIOBASE ixi	206.476	g/kWh
DK	2017	Monetary	EXIOBASE ixi	30.126	g/kWh
EE	2017	Monetary	EXIOBASE ixi	290.81	g/kWh
ES	2017	Monetary	EXIOBASE ixi	259.778	g/kWh
FI	2017	Monetary	EXIOBASE ixi	70.8303	g/kWh
FR	2017	Monetary	EXIOBASE ixi	62.991	g/kWh
GR	2017	Monetary	EXIOBASE ixi	338.175	g/kWh
HR	2017	Monetary	EXIOBASE ixi	149.268	g/kWh
HU	2017	Monetary	EXIOBASE ixi	152.576	g/kWh
IE	2017	Monetary	EXIOBASE ixi	343.191	g/kWh
IT	2017	Monetary	EXIOBASE ixi	243.172	g/kWh
LT	2017	Monetary	EXIOBASE ixi	44.5277	g/kWh
LU	2017	Monetary	EXIOBASE ixi	74.2625	g/kWh
LV	2017	Monetary	EXIOBASE ixi	54.6097	g/kWh
MT	2017	Monetary	EXIOBASE ixi	190.046	g/kWh
NL	2017	Monetary	EXIOBASE ixi	257.743	g/kWh
PL	2017	Monetary	EXIOBASE ixi	461.036	g/kWh
PT	2017	Monetary	EXIOBASE ixi	290.833	g/kWh
RO	2017	Monetary	EXIOBASE ixi	360.282	g/kWh
SE	2017	Monetary	EXIOBASE ixi	9.47145	g/kWh
SI	2017	Monetary	EXIOBASE ixi	213.603	g/kWh
SK	2017	Monetary	EXIOBASE ixi	167.09	g/kWh
US	2017	Monetary	EXIOBASE ixi	464.366	g/kWh
AT	2017	Monetary	EORA	103.247	g/kWh
BE	2017	Monetary	EORA	209.198	g/kWh
BG	2017	Monetary	EORA	386.526	g/kWh
CY	2017	Monetary	EORA	789.361	g/kWh
CZ	2017	Monetary	EORA	471.241	g/kWh
DE	2017	Monetary	EORA	198.769	g/kWh
DK	2017	Monetary	EORA	216.457	g/kWh
ES	2017	Monetary	EORA	236.532	g/kWh
EE	2017	Monetary	EORA	582.444	g/kWh
FI	2017	Monetary	EORA	247.193	g/kWh
FR	2017	Monetary	EORA	78.0973	g/kWh
GR	2017	Monetary	EORA	587.489	g/kWh
HR	2017	Monetary	EORA	237.545	g/kWh
HU	2017	Monetary	EORA	239.446	g/kWh
IE	2017	Monetary	EORA	381.488	g/kWh
IT	2017	Monetary	EORA	246.164	g/kWh
LT	2017	Monetary	EORA	247.291	g/kWh
LU	2017	Monetary	EORA	108.26	g/kWh
LV	2017	Monetary	EORA	249.344	g/kWh
MT	2017	Monetary	EORA	586.744	g/kWh
NL	2017	Monetary	EORA	215.609	g/kWh
PL	2017	Monetary	EORA	374.555	g/kWh
PT	2017	Monetary	EORA	243.255	g/kWh
RO	2017	Monetary	EORA	404.052	g/kWh
SK	2017	Monetary	EORA	163.427	g/kWh
SI	2017	Monetary	EORA	416.41	g/kWh
SE	2017	Monetary	EORA	44.292	g/kWh
US	2017	Monetary	EORA	362.401	g/kWh
AT	2017	Monetary	GLORIA act	155.194	g/kWh
BE	2017	Monetary	GLORIA act	187.506	g/kWh
BG	2017	Monetary	GLORIA act	731.603	g/kWh
CY	2017	Monetary	GLORIA act	554.388	g/kWh
CZ	2017	Monetary	GLORIA act	461.594	g/kWh
DE	2017	Monetary	GLORIA act	270.343	g/kWh
DK	2017	Monetary	GLORIA act	154.371	g/kWh
ES	2017	Monetary	GLORIA act	270.716	g/kWh
EE	2017	Monetary	GLORIA act	647.295	g/kWh
FI	2017	Monetary	GLORIA act	157.884	g/kWh
FR	2017	Monetary	GLORIA act	105.607	g/kWh
GR	2017	Monetary	GLORIA act	329.062	g/kWh
HR	2017	Monetary	GLORIA act	155.282	g/kWh
HU	2017	Monetary	GLORIA act	234.327	g/kWh
IE	2017	Monetary	GLORIA act	395.584	g/kWh
IT	2017	Monetary	GLORIA act	284.711	g/kWh
LT	2017	Monetary	GLORIA act	93.3643	g/kWh
LU	2017	Monetary	GLORIA act	38.6954	g/kWh
LV	2017	Monetary	GLORIA act	147.129	g/kWh
MT	2017	Monetary	GLORIA act	246.171	g/kWh
NL	2017	Monetary	GLORIA act	305.623	g/kWh
PL	2017	Monetary	GLORIA act	629.195	g/kWh
PT	2017	Monetary	GLORIA act	282.518	g/kWh
RO	2017	Monetary	GLORIA act	311.928	g/kWh
SK	2017	Monetary	GLORIA act	238.949	g/kWh
SI	2017	Monetary	GLORIA act	211.22	g/kWh
SE	2017	Monetary	GLORIA act	48.3267	g/kWh
US	2017	Monetary	GLORIA act	412.99	g/kWh
AT	2017	Monetary	GLORIA 0.6 com	155.192	g/kWh
BE	2017	Monetary	GLORIA 0.6 com	187.509	g/kWh
BG	2017	Monetary	GLORIA 0.6 com	731.594	g/kWh
CY	2017	Monetary	GLORIA 0.6 com	554.384	g/kWh
CZ	2017	Monetary	GLORIA 0.6 com	461.585	g/kWh
DE	2017	Monetary	GLORIA 0.6 com	270.352	g/kWh
DK	2017	Monetary	GLORIA 0.6 com	154.371	g/kWh
ES	2017	Monetary	GLORIA 0.6 com	270.72	g/kWh
EE	2017	Monetary	GLORIA 0.6 com	647.292	g/kWh
FI	2017	Monetary	GLORIA 0.6 com	157.883	g/kWh
FR	2017	Monetary	GLORIA 0.6 com	105.604	g/kWh
GR	2017	Monetary	GLORIA 0.6 com	329.071	g/kWh
HR	2017	Monetary	GLORIA 0.6 com	155.284	g/kWh
HU	2017	Monetary	GLORIA 0.6 com	234.329	g/kWh
IE	2017	Monetary	GLORIA 0.6 com	395.586	g/kWh
IT	2017	Monetary	GLORIA 0.6 com	284.71	g/kWh
LT	2017	Monetary	GLORIA 0.6 com	93.366	g/kWh
LU	2017	Monetary	GLORIA 0.6 com	38.6955	g/kWh
LV	2017	Monetary	GLORIA 0.6 com	147.127	g/kWh
MT	2017	Monetary	GLORIA 0.6 com	246.17	g/kWh
NL	2017	Monetary	GLORIA 0.6 com	305.631	g/kWh
PL	2017	Monetary	GLORIA 0.6 com	629.195	g/kWh
PT	2017	Monetary	GLORIA 0.6 com	282.51	g/kWh
RO	2017	Monetary	GLORIA 0.6 com	311.936	g/kWh
SK	2017	Monetary	GLORIA 0.6 com	238.95	g/kWh
SI	2017	Monetary	GLORIA 0.6 com	211.217	g/kWh
SE	2017	Monetary	GLORIA 0.6 com	48.3255	g/kWh
US	2017	Monetary	GLORIA 0.6 com	412.997	g/kWh
AT	2017	Monetary	EMERGING	67.2117	g/kWh
BE	2017	Monetary	EMERGING	81.1658	g/kWh
BG	2017	Monetary	EMERGING	758.463	g/kWh
CY	2017	Monetary	EMERGING	445.308	g/kWh
CZ	2017	Monetary	EMERGING	248.016	g/kWh
DE	2017	Monetary	EMERGING	398.418	g/kWh
DK	2017	Monetary	EMERGING	71.3635	g/kWh
ES	2017	Monetary	EMERGING	139.616	g/kWh
EE	2017	Monetary	EMERGING	755.413	g/kWh
FI	2017	Monetary	EMERGING	154.194	g/kWh
FR	2017	Monetary	EMERGING	59.8673	g/kWh
GR	2017	Monetary	EMERGING	598.954	g/kWh
HR	2017	Monetary	EMERGING	82.6701	g/kWh
HU	2017	Monetary	EMERGING	124.635	g/kWh
IE	2017	Monetary	EMERGING	271.702	g/kWh
IT	2017	Monetary	EMERGING	149.079	g/kWh
LT	2017	Monetary	EMERGING	30.7932	g/kWh
LU	2017	Monetary	EMERGING	563.154	g/kWh
LV	2017	Monetary	EMERGING	83.3432	g/kWh
MT	2017	Monetary	EMERGING	264.372	g/kWh
NL	2017	Monetary	EMERGING	333.733	g/kWh
PL	2017	Monetary	EMERGING	434.137	g/kWh
PT	2017	Monetary	EMERGING	462.992	g/kWh
RO	2017	Monetary	EMERGING	239.705	g/kWh
SK	2017	Monetary	EMERGING	155.321	g/kWh
SI	2017	Monetary	EMERGING	255.724	g/kWh
SE	2017	Monetary	EMERGING	16.4394	g/kWh
US	2017	Monetary	EMERGING	410.718	g/kWh
AT	2017	Monetary	GTAP 11	252.466	g/kWh
BE	2017	Monetary	GTAP 11	235.624	g/kWh
BG	2017	Monetary	GTAP 11	507.906	g/kWh
CY	2017	Monetary	GTAP 11	170.423	g/kWh
CZ	2017	Monetary	GTAP 11	622.231	g/kWh
DE	2017	Monetary	GTAP 11	705.13	g/kWh
DK	2017	Monetary	GTAP 11	208.347	g/kWh
ES	2017	Monetary	GTAP 11	367.274	g/kWh
EE	2017	Monetary	GTAP 11	961.081	g/kWh
FI	2017	Monetary	GTAP 11	226.871	g/kWh
FR	2017	Monetary	GTAP 11	134.655	g/kWh
GR	2017	Monetary	GTAP 11	840.275	g/kWh
HR	2017	Monetary	GTAP 11	376.695	g/kWh
HU	2017	Monetary	GTAP 11	318.188	g/kWh
IE	2017	Monetary	GTAP 11	637.918	g/kWh
IT	2017	Monetary	GTAP 11	392.24	g/kWh
LT	2017	Monetary	GTAP 11	93.1428	g/kWh
LU	2017	Monetary	GTAP 11	242.108	g/kWh
LV	2017	Monetary	GTAP 11	200.074	g/kWh
MT	2017	Monetary	GTAP 11	641.992	g/kWh
NL	2017	Monetary	GTAP 11	516.678	g/kWh
PL	2017	Monetary	GTAP 11	865.994	g/kWh
PT	2017	Monetary	GTAP 11	566.003	g/kWh
RO	2017	Monetary	GTAP 11	451.277	g/kWh
SK	2017	Monetary	GTAP 11	350.909	g/kWh
SI	2017	Monetary	GTAP 11	433.734	g/kWh
SE	2017	Monetary	GTAP 11	38.4258	g/kWh
US	2017	Monetary	GTAP 11	494.159	g/kWh
AT	2023	Physical	Electricity Maps	76	g/kWh
BE	2023	Physical	Electricity Maps	171	g/kWh
BG	2023	Physical	Electricity Maps	412	g/kWh
CY	2023	Physical	Electricity Maps	831	g/kWh
CZ	2023	Physical	Electricity Maps	506	g/kWh
DE	2023	Physical	Electricity Maps	405	g/kWh
DK	2023	Physical	Electricity Maps	166	g/kWh
EE	2023	Physical	Electricity Maps	572	g/kWh
ES	2023	Physical	Electricity Maps	155	g/kWh
FI	2023	Physical	Electricity Maps	92	g/kWh
FR	2023	Physical	Electricity Maps	42	g/kWh
GR	2023	Physical	Electricity Maps	305	g/kWh
HR	2023	Physical	Electricity Maps	238	g/kWh
HU	2023	Physical	Electricity Maps	246	g/kWh
IE	2023	Physical	Electricity Maps	415	g/kWh
IT	2023	Physical	Electricity Maps	362	g/kWh
LT	2023	Physical	Electricity Maps	127	g/kWh
LV	2023	Physical	Electricity Maps	157	g/kWh
NL	2023	Physical	Electricity Maps	288	g/kWh
PL	2023	Physical	Electricity Maps	777	g/kWh
PT	2023	Physical	Electricity Maps	152	g/kWh
RO	2023	Physical	Electricity Maps	280	g/kWh
SE	2023	Physical	Electricity Maps	21	g/kWh
SI	2023	Physical	Electricity Maps	251	g/kWh
SK	2023	Physical	Electricity Maps	139	g/kWh
US	2023	Physical	Electricity Maps	421	g/kWh
AT	2023	Physical	EMBER	112	g/kWh
BE	2023	Physical	EMBER	135	g/kWh
BG	2023	Physical	EMBER	338	g/kWh
CY	2023	Physical	EMBER	533	g/kWh
CZ	2023	Physical	EMBER	443	g/kWh
DE	2023	Physical	EMBER	363	g/kWh
DK	2023	Physical	EMBER	152	g/kWh
EE	2023	Physical	EMBER	395	g/kWh
ES	2023	Physical	EMBER	170	g/kWh
FI	2023	Physical	EMBER	81.2	g/kWh
FR	2023	Physical	EMBER	53.3	g/kWh
GR	2023	Physical	EMBER	336	g/kWh
HR	2023	Physical	EMBER	195	g/kWh
HU	2023	Physical	EMBER	196	g/kWh
IE	2023	Physical	EMBER	282	g/kWh
IT	2023	Physical	EMBER	323	g/kWh
LT	2023	Physical	EMBER	119	g/kWh
LV	2023	Physical	EMBER	119	g/kWh
NL	2023	Physical	EMBER	268	g/kWh
PL	2023	Physical	EMBER	651	g/kWh
PT	2023	Physical	EMBER	158	g/kWh
RO	2023	Physical	EMBER	243	g/kWh
SE	2023	Physical	EMBER	38.4	g/kWh
SI	2023	Physical	EMBER	225	g/kWh
SK	2023	Physical	EMBER	115	g/kWh
US	2023	Physical	EMBER	393	g/kWh
AT	2023	Hybrid	EXIO Hybrid	273.628	g/kWh	generation shares from ENTSO-E
AT	2023	Physical	NREL	72.5382	g/kWh	generation shares from ENTSO-E
AT	2023	Physical	IPCC	81.0171	g/kWh	generation shares from ENTSO-E
BE	2023	Hybrid	EXIO Hybrid	250.159	g/kWh	generation shares from ENTSO-E
BE	2023	Physical	NREL	125.393	g/kWh	generation shares from ENTSO-E
BE	2023	Physical	IPCC	124.021	g/kWh	generation shares from ENTSO-E
BG	2023	Hybrid	EXIO Hybrid	615.065	g/kWh	generation shares from ENTSO-E
BG	2023	Physical	NREL	371.443	g/kWh	generation shares from ENTSO-E
BG	2023	Physical	IPCC	316.456	g/kWh	generation shares from ENTSO-E
CZ	2023	Hybrid	EXIO Hybrid	941.034	g/kWh	generation shares from ENTSO-E
CZ	2023	Physical	NREL	428.498	g/kWh	generation shares from ENTSO-E
CZ	2023	Physical	IPCC	365.006	g/kWh	generation shares from ENTSO-E
DE	2023	Hybrid	EXIO Hybrid	570.279	g/kWh	generation shares from ENTSO-E
DE	2023	Physical	NREL	359.284	g/kWh	generation shares from ENTSO-E
DE	2023	Physical	IPCC	314.533	g/kWh	generation shares from ENTSO-E
DK	2023	Hybrid	EXIO Hybrid	282.309	g/kWh	generation shares from ENTSO-E
DK	2023	Physical	NREL	181.851	g/kWh	generation shares from ENTSO-E
DK	2023	Physical	IPCC	163.074	g/kWh	generation shares from ENTSO-E
EE	2023	Hybrid	EXIO Hybrid	853.893	g/kWh	generation shares from ENTSO-E
EE	2023	Physical	NREL	522.642	g/kWh	generation shares from ENTSO-E
EE	2023	Physical	IPCC	504.358	g/kWh	generation shares from ENTSO-E
GR	2023	Hybrid	EXIO Hybrid	470.118	g/kWh	generation shares from ENTSO-E
GR	2023	Physical	NREL	297.605	g/kWh	generation shares from ENTSO-E
GR	2023	Physical	IPCC	279.361	g/kWh	generation shares from ENTSO-E
ES	2023	Hybrid	EXIO Hybrid	256.019	g/kWh	generation shares from ENTSO-E
ES	2023	Physical	NREL	141.268	g/kWh	generation shares from ENTSO-E
ES	2023	Physical	IPCC	137.992	g/kWh	generation shares from ENTSO-E
FI	2023	Hybrid	EXIO Hybrid	227.223	g/kWh	generation shares from ENTSO-E
FI	2023	Physical	NREL	81.8746	g/kWh	generation shares from ENTSO-E
FI	2023	Physical	IPCC	76.4562	g/kWh	generation shares from ENTSO-E
FR	2023	Hybrid	EXIO Hybrid	137.1	g/kWh	generation shares from ENTSO-E
FR	2023	Physical	NREL	48.4817	g/kWh	generation shares from ENTSO-E
FR	2023	Physical	IPCC	48.3793	g/kWh	generation shares from ENTSO-E
HR	2023	Hybrid	EXIO Hybrid	314.715	g/kWh	generation shares from ENTSO-E
HR	2023	Physical	NREL	189.759	g/kWh	generation shares from ENTSO-E
HR	2023	Physical	IPCC	186.132	g/kWh	generation shares from ENTSO-E
HU	2023	Hybrid	EXIO Hybrid	335.345	g/kWh	generation shares from ENTSO-E
HU	2023	Physical	NREL	211.646	g/kWh	generation shares from ENTSO-E
HU	2023	Physical	IPCC	195.52	g/kWh	generation shares from ENTSO-E
IE	2023	Hybrid	EXIO Hybrid	521.607	g/kWh	generation shares from ENTSO-E
IE	2023	Physical	NREL	313.122	g/kWh	generation shares from ENTSO-E
IE	2023	Physical	IPCC	303.068	g/kWh	generation shares from ENTSO-E
IT	2023	Hybrid	EXIO Hybrid	698.125	g/kWh	generation shares from ENTSO-E
IT	2023	Physical	NREL	320.815	g/kWh	generation shares from ENTSO-E
IT	2023	Physical	IPCC	310.139	g/kWh	generation shares from ENTSO-E
LT	2023	Hybrid	EXIO Hybrid	193.15	g/kWh	generation shares from ENTSO-E
LT	2023	Physical	NREL	101.62	g/kWh	generation shares from ENTSO-E
LT	2023	Physical	IPCC	101.54	g/kWh	generation shares from ENTSO-E
LV	2023	Hybrid	EXIO Hybrid	271.85	g/kWh	generation shares from ENTSO-E
LV	2023	Physical	NREL	135.746	g/kWh	generation shares from ENTSO-E
LV	2023	Physical	IPCC	145.546	g/kWh	generation shares from ENTSO-E
NL	2023	Hybrid	EXIO Hybrid	427.612	g/kWh	generation shares from ENTSO-E
NL	2023	Physical	NREL	396.041	g/kWh	generation shares from ENTSO-E
NL	2023	Physical	IPCC	369.895	g/kWh	generation shares from ENTSO-E
PL	2023	Hybrid	EXIO Hybrid	1359.37	g/kWh	generation shares from ENTSO-E
PL	2023	Physical	NREL	684.99	g/kWh	generation shares from ENTSO-E
PL	2023	Physical	IPCC	582.42	g/kWh	generation shares from ENTSO-E
PT	2023	Hybrid	EXIO Hybrid	218.322	g/kWh	generation shares from ENTSO-E
PT	2023	Physical	NREL	135.265	g/kWh	generation shares from ENTSO-E
PT	2023	Physical	IPCC	138.716	g/kWh	generation shares from ENTSO-E
RO	2023	Hybrid	EXIO Hybrid	385.312	g/kWh	generation shares from ENTSO-E
RO	2023	Physical	NREL	234.18	g/kWh	generation shares from ENTSO-E
RO	2023	Physical	IPCC	215.203	g/kWh	generation shares from ENTSO-E
SE	2023	Hybrid	EXIO Hybrid	12.6965	g/kWh	generation shares from ENTSO-E
SE	2023	Physical	NREL	12.2489	g/kWh	generation shares from ENTSO-E
SE	2023	Physical	IPCC	17.2553	g/kWh	generation shares from ENTSO-E
SI	2023	Hybrid	EXIO Hybrid	292.257	g/kWh	generation shares from ENTSO-E
SI	2023	Physical	NREL	223.489	g/kWh	generation shares from ENTSO-E
SI	2023	Physical	IPCC	195.364	g/kWh	generation shares from ENTSO-E
SK	2023	Hybrid	EXIO Hybrid	199.824	g/kWh	generation shares from ENTSO-E
SK	2023	Physical	NREL	99.7096	g/kWh	generation shares from ENTSO-E
SK	2023	Physical	IPCC	95.9357	g/kWh	generation shares from ENTSO-E
US	2023	Hybrid	EXIO Hybrid	643.929	g/kWh	generation shares from ENTSO-E
US	2023	Physical	NREL	385.615	g/kWh	generation shares from ENTSO-E
US	2023	Physical	IPCC	359.52	g/kWh	generation shares from ENTSO-E
AT	2023	Monetary	GLORIA com	292.828	g/kWh
BE	2023	Monetary	GLORIA com	191.243	g/kWh
BG	2023	Monetary	GLORIA com	472.234	g/kWh
CY	2023	Monetary	GLORIA com	1341.33	g/kWh
CZ	2023	Monetary	GLORIA com	597.607	g/kWh
DE	2023	Monetary	GLORIA com	224.009	g/kWh
DK	2023	Monetary	GLORIA com	138.871	g/kWh
ES	2023	Monetary	GLORIA com	242.247	g/kWh
EE	2023	Monetary	GLORIA com	435.404	g/kWh
FI	2023	Monetary	GLORIA com	136.639	g/kWh
FR	2023	Monetary	GLORIA com	89.3439	g/kWh
GR	2023	Monetary	GLORIA com	463.622	g/kWh
HR	2023	Monetary	GLORIA com	256.517	g/kWh
HU	2023	Monetary	GLORIA com	308.245	g/kWh
IE	2023	Monetary	GLORIA com	499.611	g/kWh
IT	2023	Monetary	GLORIA com	382.864	g/kWh
LT	2023	Monetary	GLORIA com	99.6202	g/kWh
LU	2023	Monetary	GLORIA com	48.9736	g/kWh
LV	2023	Monetary	GLORIA com	121.37	g/kWh
MT	2023	Monetary	GLORIA com	328.028	g/kWh
NL	2023	Monetary	GLORIA com	402.258	g/kWh
PL	2023	Monetary	GLORIA com	797.06	g/kWh
PT	2023	Monetary	GLORIA com	308.534	g/kWh
RO	2023	Monetary	GLORIA com	125.427	g/kWh
SK	2023	Monetary	GLORIA com	312.515	g/kWh
SI	2023	Monetary	GLORIA com	259.343	g/kWh
SE	2023	Monetary	GLORIA com	37.7501	g/kWh
US	2023	Monetary	GLORIA com	649.686	g/kWh
AT	2023	Monetary	GLORIA act	292.822	g/kWh
BE	2023	Monetary	GLORIA act	191.246	g/kWh
BG	2023	Monetary	GLORIA act	472.235	g/kWh
CY	2023	Monetary	GLORIA act	1341.33	g/kWh
CZ	2023	Monetary	GLORIA act	597.612	g/kWh
DE	2023	Monetary	GLORIA act	224.004	g/kWh
DK	2023	Monetary	GLORIA act	138.873	g/kWh
ES	2023	Monetary	GLORIA act	242.247	g/kWh
EE	2023	Monetary	GLORIA act	435.412	g/kWh
FI	2023	Monetary	GLORIA act	136.643	g/kWh
FR	2023	Monetary	GLORIA act	89.3429	g/kWh
GR	2023	Monetary	GLORIA act	463.632	g/kWh
HR	2023	Monetary	GLORIA act	256.517	g/kWh
HU	2023	Monetary	GLORIA act	308.246	g/kWh
IE	2023	Monetary	GLORIA act	499.609	g/kWh
IT	2023	Monetary	GLORIA act	382.863	g/kWh
LT	2023	Monetary	GLORIA act	99.6211	g/kWh
LU	2023	Monetary	GLORIA act	48.974	g/kWh
LV	2023	Monetary	GLORIA act	121.371	g/kWh
MT	2023	Monetary	GLORIA act	328.033	g/kWh
NL	2023	Monetary	GLORIA act	402.259	g/kWh
PL	2023	Monetary	GLORIA act	797.063	g/kWh
PT	2023	Monetary	GLORIA act	308.544	g/kWh
RO	2023	Monetary	GLORIA act	125.428	g/kWh
SK	2023	Monetary	GLORIA act	312.528	g/kWh
SI	2023	Monetary	GLORIA act	259.347	g/kWh
SE	2023	Monetary	GLORIA act	37.7495	g/kWh
US	2023	Monetary	GLORIA act	649.695	g/kWh
AT	2023	Monetary	EMERGING	468.659	g/kWh
BE	2023	Monetary	EMERGING	91.4609	g/kWh
BG	2023	Monetary	EMERGING	355.637	g/kWh
CY	2023	Monetary	EMERGING	624.149	g/kWh
CZ	2023	Monetary	EMERGING	1248.5	g/kWh
DE	2023	Monetary	EMERGING	262.896	g/kWh
DK	2023	Monetary	EMERGING	210.978	g/kWh
ES	2023	Monetary	EMERGING	259.963	g/kWh
EE	2023	Monetary	EMERGING	750.294	g/kWh
FI	2023	Monetary	EMERGING	115.1	g/kWh
FR	2023	Monetary	EMERGING	194.826	g/kWh
GR	2023	Monetary	EMERGING	733.876	g/kWh
HR	2023	Monetary	EMERGING	237.956	g/kWh
HU	2023	Monetary	EMERGING	1445.46	g/kWh
IE	2023	Monetary	EMERGING	413.029	g/kWh
IT	2023	Monetary	EMERGING	309.226	g/kWh
LT	2023	Monetary	EMERGING	46.6114	g/kWh
LU	2023	Monetary	EMERGING	1239.79	g/kWh
LV	2023	Monetary	EMERGING	274.98	g/kWh
MT	2023	Monetary	EMERGING	436.933	g/kWh
NL	2023	Monetary	EMERGING	90.4667	g/kWh
PL	2023	Monetary	EMERGING	1143.17	g/kWh
PT	2023	Monetary	EMERGING	236.018	g/kWh
RO	2023	Monetary	EMERGING	766.308	g/kWh
SK	2023	Monetary	EMERGING	319.42	g/kWh
SI	2023	Monetary	EMERGING	739.709	g/kWh
SE	2023	Monetary	EMERGING	32.2503	g/kWh
US	2023	Monetary	EMERGING	654.238	g/kWh

## Sheet: Stat analysis CI 2017
	Physical	Physical	Hybrid	Monetary	Monetary	Monetary	Monetary	Monetary	Monetary	Stats										Sources comparison
Paese	Electricity Maps	JRC	EXIO Hybrid	EORA 199.82	EXIOBASE 3.10 ixi	EXIOBASE 3.10 pxp	GLORIA 0.6 act	GTAP 11	EMERGING 1	Median	Mean	Standard dev	CV%	Min	Max	Relative dispersion%	Q1	Q2	IQR	Source min	Source max
AT	90.4851	315.531	154.309	47.7124	24.8677	35.7095	54.6251	198.515	24.5662	54.6251	105.147	99.5124	0.946414	24.5662	315.531	5.32658	35.7095	154.309	109.597	EMERGING 1	JRC
BE	141.315	217.128	185.214	159.508	120.054	200.247	140.961	188.047	20.6669	159.508	152.571	58.6626	0.384493	20.6669	217.128	1.23167	140.961	188.047	46.8208	EMERGING 1	JRC
BG	545.012	658.428	542.046	217.288	379.965	615.315	597.028	403.522	488.435	542.046	494.116	139.226	0.281767	217.288	658.428	0.813842	403.522	597.028	199.396	EORA 199.82	JRC
CY		722.279		454.296	441.622	547.802	497.205	117.121	263.724	454.296	434.864	195.756	0.450154	117.121	722.279	1.33208	352.673	522.504	77.7128	GTAP 11	JRC
CZ	553.2	659.619	558.408	165.323	249.897	384.755	333.156	528.348	169.774	384.755	400.276	182.944	0.457044	165.323	659.619	1.2847	249.897	553.2	240.859	EORA 199.82	JRC
DE	448.703	474.827	454.991	141.561	171.673	263.736	217.133	630.869	288.79	288.79	343.587	165.436	0.481497	141.561	630.869	1.69434	217.133	454.991	249.223	EORA 199.82	GTAP 11
DK	173.257	140.558	229.582	163.339	11.1562	9.64601	127.202	174.412	48.1378	140.558	119.699	78.5384	0.656133	9.64601	229.582	1.56473	48.1378	173.257	75.0661	EXIOBASE 3.10 pxp	EXIO Hybrid
EE	574.275	1032.47	544.22	351.577	266.076	288.796	450.158	211.541	561.787	450.158	475.655	249.13	0.523761	211.541	1032.47	1.82364	288.796	561.787	278.671	GTAP 11	JRC
ES	314.685	338.13	299.239	172.577	232.698	383.343	174.399	289.997	58.8313	289.997	251.544	101.42	0.403191	58.8313	383.343	1.11902	174.399	314.685	96.562	EMERGING 1	EXIOBASE 3.10 pxp
FI	155.89	98.4943	246.013	189.922	60.2133	70.2215	128.648	187.848	116.685	128.648	139.326	61.134	0.438783	60.2133	246.013	1.44425	98.4943	187.848	96.4224	EXIOBASE 3.10 ixi	EXIO Hybrid
FR	51.0338	87.2297	71.5099	39.9508	37.8066	49.6596	40.5713	103.063	25.3326	49.6596	56.2397	25.6472	0.456034	25.3326	103.063	1.56526	39.9508	71.5099	31.0938	EMERGING 1	GTAP 11
GR	604.555	615.218	599.792	492.56	251.428	379.904	251.467	706.28	356.693	492.56	473.1	169.106	0.357443	251.428	706.28	0.923443	356.693	604.555	256.76	EXIOBASE 3.10 ixi	GTAP 11
HR	229.137	418.883	270.189	120.422	98.733	139.039	99.9135	302.975	42.2704	139.039	191.285	121.863	0.637078	42.2704	418.883	2.70868	99.9135	270.189	154.894	EMERGING 1	JRC
HU	320.612	282.303	317.412	113.956	126.91	162.662	197.181	265.832	83.9646	197.181	207.87	91.1695	0.438588	83.9646	320.612	1.20015	126.91	282.303	128.579	EMERGING 1	Electricity Maps
IE	505.248	422.844	453.891	277.487	318.413	452.27	310.203	582.572	208.023	422.844	392.328	120.739	0.307749	208.023	582.572	0.885785	310.203	453.891	137.531	EMERGING 1	GTAP 11
IT	384.552	327.67	345.193	170.17	189.689	265.848	151.118	315.837	86.2969	265.848	248.486	102.683	0.413235	86.2969	384.552	1.1219	170.17	327.67	142.861	EMERGING 1	Electricity Maps
LT	104.417	70.6746	120.289	93.4895	14.3544	18.6493	57.6241	64.0431	5.86163	64.0431	61.0448	41.2003	0.674919	5.86163	120.289	1.78673	18.6493	93.4895	45.609	EMERGING 1	EXIO Hybrid
LU		437.211		62.354	13.3493	4.10902	14.0905	172.776	310.776	62.354	144.952	170.68	1.17749	4.10902	437.211	6.94586	13.7199	241.776	228.242	EXIOBASE 3.10 pxp	JRC
LV	134.805	370.214	144.456	113.062	26.1845	21.4197	62.3172	148.877	36.8783	113.062	117.579	107.825	0.91704	21.4197	370.214	3.08499	36.8783	144.456	91.172	EXIOBASE 3.10 pxp	JRC
MT		423.599		430.806	83.0254	125.986	82.1957	518.857	219.379	219.379	269.121	184.801	0.686683	82.1957	518.857	1.99044	104.505	427.203	333.437	GLORIA 0.6 act	GTAP 11
NL	527.982	466.042	395.235	131.931	220.722	266.424	239.178	444.74	242.474	266.424	326.081	135.144	0.41445	131.931	527.982	1.48655	239.178	444.74	210.176	EORA 199.82	Electricity Maps
PL	916.434	867.558	760.243	279.232	427.726	577.243	551.566	726.978	357.07	577.243	607.117	225.697	0.371752	279.232	916.434	1.10387	427.726	760.243	239.637	EORA 199.82	Electricity Maps
PT	393.22	423.487	398.856	159.877	168.878	254.549	149.693	481.551	255.448	255.448	298.395	127.534	0.4274	149.693	481.551	1.29912	168.878	398.856	232.228	GLORIA 0.6 act	GTAP 11
RO	430.136	471.222	400.543	120.637	291.775	425.48	223.129	369.798	128.633	369.798	317.928	133.041	0.418464	120.637	471.222	0.948043	223.129	425.48	150.866	EORA 199.82	JRC
SE	1.52382	17.047	0.0181888	37.5882	1.69458	1.18422	36.3745	28.6009	7.31368	7.31368	14.5939	15.7632	1.08013	0.0181888	37.5882	5.13695	1.52382	28.6009	27.162	EXIO Hybrid	EORA 199.82
SI	305.808	235.522	292.216	240.44	188.997	171.877	160.864	335.984	200.623	235.522	236.926	62.5103	0.263839	160.864	335.984	0.743539	188.997	292.216	107.499	GLORIA 0.6 act	GTAP 11
SK	169.084	429.076	138.96	47.0966	86.1193	56.4883	86.1862	267.394	52.6804	86.1862	148.121	127.022	0.857558	47.0966	429.076	4.43202	56.4883	169.084	90.3729	EORA 199.82	JRC
US	438.912		441.135	322.472	457.322	675.655	380.968	425.422	359.144	432.167	437.629	106.797	0.244035	322.472	675.655	0.817238	375.512	445.182	41.9868	EORA 199.82	EXIOBASE 3.10 pxp

## Sheet: Stat analysis CI 2023
	Physical	Hybrid	Monetary	Monetary	Stats										Sources comparison
Paese	Electricity Maps	EXIO Hybrid	GLORIA 0.6 act	EMERGING 1	Median	Mean	Standard dev	CV%	Min	Max	Relative dispersion%	Q1	Q2	IQR	Source min	Source max
AT	43.1471	86.7787	127.905	221.659	107.342	119.872	76.1729	0.63545	43.1471	221.659	1.66302	75.8708	151.344	86.3807	Electricity Maps	EMERGING 1
BE	121.142	135.436	146.678	35.453	128.289	109.677	50.5742	0.461118	35.453	146.678	0.866986	99.7195	138.247	9.95776	EMERGING 1	GLORIA 0.6 act
BG	405.077	405.835	371.412	216.677	388.244	349.75	90.1562	0.257773	216.677	405.835	0.487215	332.728	405.267	17.0222	EMERGING 1	EXIO Hybrid
CY			1061.71	559.896	810.803	810.803	354.835	0.437635	559.896	1061.71	0.618909	685.35	936.256	-125.453	EMERGING 1	GLORIA 0.6 act
CZ	440.538	443.855	468.956	999.972	456.405	588.33	274.721	0.466951	440.538	999.972	1.22574	443.026	601.71	159.513	Electricity Maps	EMERGING 1
DE	328.284	335.989	180.819	176.832	254.551	255.481	88.5849	0.346738	176.832	335.989	0.625246	179.822	330.21	75.6587	EMERGING 1	EXIO Hybrid
DK	97.3162	133.422	112.305	147.105	122.863	122.537	22.0822	0.180208	97.3162	147.105	0.40524	108.557	136.842	32.0321	Electricity Maps	EMERGING 1
EE	382.459	381.457	248.208	611.589	381.958	405.928	150.91	0.371765	248.208	611.589	0.951363	348.145	439.741	124.909	GLORIA 0.6 act	EMERGING 1
ES	108.388	137.248	135.526	135.768	135.647	129.233	13.9171	0.10769	108.388	137.248	0.212757	128.742	136.138	14.1808	Electricity Maps	EXIO Hybrid
FI	47.6016	76.671	104.187	78.3888	77.5299	76.712	23.1307	0.301526	47.6016	104.187	0.729847	69.4036	84.8382	22.702	Electricity Maps	GLORIA 0.6 act
FR	26.9109	43.7587	41.8426	62.1562	42.8006	43.6671	14.4448	0.330794	26.9109	62.1562	0.823478	38.1097	48.358	13.9813	Electricity Maps	EMERGING 1
GR	277.55	313.166	355.414	447.512	334.29	348.411	73.334	0.210482	277.55	447.512	0.508428	304.262	378.439	83.081	Electricity Maps	EMERGING 1
HR	164.677	198.039	154.576	184.12	174.398	175.353	19.4695	0.11103	154.576	198.039	0.249218	162.152	187.6	27.9731	GLORIA 0.6 act	EXIO Hybrid
HU	210.959	219.841	269.228	1104.21	244.535	451.06	436.189	0.96703	210.959	1104.21	3.65287	217.621	477.975	262.574	Electricity Maps	EMERGING 1
IE	299.496	304.419	409.404	302.029	303.224	328.837	53.7488	0.163451	299.496	409.404	0.362463	301.396	330.665	28.7076	Electricity Maps	GLORIA 0.6 act
IT	294.727	331.748	177.59	163.959	236.159	242.006	83.8132	0.346327	163.959	331.748	0.710494	174.182	303.982	67.8238	EMERGING 1	EXIO Hybrid
LT	57.436	77.9803	68.4393	5.94325	62.9376	52.4497	32.1206	0.612407	5.94325	77.9803	1.14458	44.5628	70.8245	7.88689	EMERGING 1	EXIO Hybrid
LU			25.2874	921.514	473.401	473.401	633.728	1.33867	25.2874	921.514	1.89317	249.344	697.457	672.17	GLORIA 0.6 act	EMERGING 1
LV	103.634	159.562	30.3846	194.106	131.598	121.922	71.5094	0.58652	30.3846	194.106	1.2441	85.3217	168.198	101.189	GLORIA 0.6 act	EMERGING 1
MT			114.355	301.506	207.93	207.93	132.336	0.636443	114.355	301.506	0.900067	161.142	254.718	140.363	GLORIA 0.6 act	EMERGING 1
NL	405.87	261.453	323.493	90.4718	292.473	270.322	133.698	0.494587	90.4718	405.87	1.07838	218.707	344.088	51.6145	EMERGING 1	Electricity Maps
PL	728.438	620.893	735.69	1013.64	732.064	774.666	167.742	0.216535	620.893	1013.64	0.536496	701.552	805.178	130.513	EXIO Hybrid	EMERGING 1
PT	86.6269	120.92	124.764	129.917	122.842	115.557	19.6356	0.169922	86.6269	129.917	0.352403	112.347	126.052	22.2784	Electricity Maps	EMERGING 1
RO	272.785	265.598	89.5011	631.22	269.192	314.776	227.352	0.722267	89.5011	631.22	2.01239	221.574	362.394	184.845	GLORIA 0.6 act	EMERGING 1
SE	1.34286	0.0325183	28.2697	12.438	6.89044	10.5208	13.0759	1.24286	0.0325183	28.2697	4.09802	1.01527	16.3959	15.7083	EXIO Hybrid	GLORIA 0.6 act
SI	220.885	213.259	173.123	480.129	217.072	271.849	140.425	0.516554	173.123	480.129	1.4143	203.225	285.696	92.5046	GLORIA 0.6 act	EMERGING 1
SK	97.6116	91.1406	123.445	207.611	110.528	129.952	53.6208	0.41262	91.1406	207.611	1.05377	95.9938	144.487	50.1104	EXIO Hybrid	EMERGING 1
US	341.319	359.447	604.76	583.129	471.288	472.164	141.091	0.298819	341.319	604.76	0.55898	354.915	588.537	238.154	Electricity Maps	GLORIA 0.6 act

## Sheet: Stat analysis CF 2017
	Physical	Physical	Physical	Physical	Physical	Hybrid	Monetary	Monetary	Monetary	Monetary	Monetary	Monetary	Monetary	Stats										Sources comparison
Paese	Electricity Maps	EMBER	IPCC	JRC	NREL	EXIO Hybrid	EORA 199.82	EXIOBASE 3.10 ixi	EXIOBASE 3.10 pxp	GLORIA 0.6 act	GLORIA 0.6 com	GTAP 11	EMERGING 1	Median	Mean	Standard dev	CV%	Min	Max	Relative dispersion%	Q1	Q2	IQR	Source min	Source max
AT	156	163	131.243	292.545	126.763	430.335	103.247	73.4073	76.3788	155.194	155.192	252.466	67.2117	155.193	176.314	102.567	0.581728	73.4073	430.335	2.2999	120.884	185.367	64.4824	EXIOBASE 3.10 ixi	EXIO Hybrid
BE	203	159	163.105	230.389	163.018	322.755	209.198	150.762	222.262	187.506	187.509	235.624	81.1658	195.254	202.844	47.5775	0.234552	150.762	322.755	0.880865	163.084	224.294	61.2103	EXIOBASE 3.10 ixi	EXIO Hybrid
BG	552	503	414.849	573.846	489.599	816.819	386.526	428.404	672.128	731.603	731.594	507.906	758.463	529.953	567.356	140.268	0.247231	386.526	816.819	0.811945	474.3	686.994	212.694	EORA 199.82	EXIO Hybrid
CY	897	606	0	858.812			789.361	506.671	630.826	554.388	554.384	170.423	445.308	580.194	556.786	284.95	0.511777	0	897	1.54603	518.599	749.727	231.128	IPCC	Electricity Maps
CZ	601	542	452.13	624.09	533.732	1164.76	471.241	303.604	428.794	461.594	461.585	622.231	248.016	502.487	555.563	212.776	0.382992	303.604	1164.76	1.71379	459.221	606.308	147.087	EXIOBASE 3.10 ixi	EXIO Hybrid
DE	520	470	409.88	441.606	470.795	761.224	198.769	206.476	285.731	270.343	270.352	705.13	398.418	425.743	417.526	183.567	0.439654	198.769	761.224	1.32111	270.35	483.096	212.746	EORA 199.82	EXIO Hybrid
DK	294	283	262.812	170.597	293.692	471.12	216.457	30.126	20.5539	154.371	154.371	208.347	71.3635	212.402	213.287	122.942	0.576417	20.5539	471.12	2.12129	154.371	285.673	131.302	EXIOBASE 3.10 pxp	EXIO Hybrid
EE	778	583	782.286	725.162	789.088	1406.68	582.444	290.81	310.317	647.295	647.292	961.081	755.413	686.228	708.621	292.396	0.412627	290.81	1406.68	1.6261	582.861	783.987	201.126	EXIOBASE 3.10 ixi	EXIO Hybrid
ES	329	329	280.243	301.475	307.652	599.671	236.532	259.778	407.481	270.716	270.72	367.274	139.616	304.564	329.962	97.5157	0.295536	236.532	599.671	1.19233	270.719	338.568	67.8498	EORA 199.82	EXIO Hybrid
FI	229	186	200.906	95.4828	223.21	627.107	247.193	70.8303	81.492	157.884	157.883	226.871	154.194	193.453	208.655	144.991	0.694887	70.8303	627.107	2.87552	142.283	227.403	85.1205	EXIOBASE 3.10 ixi	EXIO Hybrid
FR	72	78.3	72.3444	86.1058	74.7434	199.538	78.0973	62.991	67.8777	105.607	105.604	134.655	59.8673	78.1986	94.8219	38.8257	0.409459	62.991	199.538	1.74616	72.2583	105.605	33.3463	EXIOBASE 3.10 ixi	EXIO Hybrid
GR	776	580	494.791	651.403	553.867	831.496	587.489	338.175	417.254	329.062	329.071	840.275	598.954	566.933	560.74	188.042	0.335346	329.062	840.275	0.901715	397.484	682.553	285.068	GLORIA 0.6 act	GTAP 11
HR	261	256	246.688	385.977	259.009	432.947	237.545	149.268	167.305	155.282	155.284	376.695	82.6701	251.344	256.917	96.6575	0.376221	149.268	432.947	1.12865	164.3	289.924	125.624	EXIOBASE 3.10 ixi	EXIO Hybrid
HU	354	291	270.04	289.247	296.504	454.57	239.446	152.576	185.33	234.327	234.329	318.188	124.635	279.644	276.63	79.1238	0.286028	152.576	454.57	1.07992	234.329	301.925	67.5959	EXIOBASE 3.10 ixi	EXIO Hybrid
IE	409	404	453.497	401.095	488.425	775.997	381.488	343.191	470.328	395.584	395.586	637.918	271.702	406.5	463.009	124.196	0.268236	343.191	775.997	1.06471	395.585	474.852	79.2666	EXIOBASE 3.10 ixi	EXIO Hybrid
IT	456	393	322.423	381.987	339.897	720.438	246.164	243.172	288.75	284.711	284.71	392.24	149.079	331.16	362.791	130.205	0.358898	243.172	720.438	1.4412	284.711	392.43	107.719	EXIOBASE 3.10 ixi	EXIO Hybrid
LT	190	183	146.581	89.0415	142.556	284.476	247.291	44.5277	37.3756	93.3643	93.366	93.1428	30.7932	117.961	137.06	77.1472	0.562871	37.3756	284.476	2.09476	92.1175	184.75	92.6325	EXIOBASE 3.10 pxp	EXIO Hybrid
LU				363.384			108.26	74.2625	20.3824	38.6954	38.6955	242.108	563.154	74.2625	126.541	128.596	1.01624	20.3824	363.384	4.61877	38.6954	175.184	136.489	EXIOBASE 3.10 pxp	JRC
LV	211	141	149.212	477.039	139.732	252.124	249.344	54.6097	38.8274	147.129	147.127	200.074	83.3432	148.171	183.935	113.348	0.616238	38.8274	477.039	2.95748	140.683	220.586	79.903	EXIOBASE 3.10 pxp	JRC
MT				492.487			586.744	190.046	188.384	246.171	246.17	641.992	264.372	246.171	370.285	196.637	0.531041	188.384	641.992	1.84266	218.108	539.615	321.507	EXIOBASE 3.10 pxp	GTAP 11
NL	579	490	560.591	476.348	618.265	663.794	215.609	257.743	301.218	305.623	305.631	516.678	333.733	483.174	440.875	155.025	0.351629	215.609	663.794	0.927585	304.522	565.193	260.672	EORA 199.82	EXIO Hybrid
PL	956	806	711.591	872.772	843.815	1641.53	374.555	461.036	618.994	629.195	629.195	865.994	434.137	758.795	784.223	321.354	0.409773	374.555	1641.53	1.66971	626.645	867.688	241.044	EORA 199.82	EXIO Hybrid
PT	476	434	383.216	352.699	420.916	724.825	243.255	290.833	307.141	282.518	282.51	566.003	462.992	367.958	396.993	139.988	0.352621	243.255	724.825	1.30877	288.755	444.5	155.745	EORA 199.82	EXIO Hybrid
RO	488	369	317.847	503.368	358.499	547.703	404.052	360.282	477.965	311.928	311.936	451.277	239.705	386.526	408.488	82.3665	0.201637	311.928	547.703	0.609983	348.336	480.474	132.138	GLORIA 0.6 act	EXIO Hybrid
SE	20	42.5	17.2487	27.4909	11.9712	10.4414	44.292	9.47145	9.09625	48.3267	48.3255	38.4258	16.4394	23.7454	27.2992	16.0978	0.58968	9.09625	48.3267	1.65212	11.5887	42.948	31.3593	EXIOBASE 3.10 pxp	GLORIA 0.6 act
SI	327	318	259.25	249.586	302.363	383.772	416.41	213.603	187.876	211.22	211.217	433.734	255.724	280.807	292.836	84.6916	0.289212	187.876	433.734	0.875542	213.008	341.193	128.186	EXIOBASE 3.10 pxp	GTAP 11
SK	234	183	133.473	397.299	147.152	272.577	163.427	167.09	118.744	238.949	238.95	350.909	155.321	208.5	220.464	86.6883	0.393208	118.744	397.299	1.336	159.358	247.357	87.9991	EXIOBASE 3.10 pxp	JRC
US	468	469	423.825		473.879	842.675	362.401	464.366	684.7	412.99	412.997	494.159	410.718	468	500.818	139.779	0.279101	362.401	842.675	1.02623	418.411	484.019	65.6075	EORA 199.82	EXIO Hybrid

[truncated: 2 more sheets: Stat analysis CF 2023, Data Sources' Details]
